# Supplementary material for: Satellite tagging highlights the importance of productive Mozambican coastal waters to the ecology and conservation of whale sharks
Source: PeerJ. 2018 Jan 2;6:e4161. doi: 10.7717/peerj.4161 (PMC5755488; doi:10.7717/peerj.4161)
Supplement: Data S1 [file peerj-06-4161-s003.xlsx]

## Sheet: Aerial surveys
Start	End	Flight section														Total flights		wsharks	lon	lat	index	Section	flights	Shark per flight
Durban	Maputo	1	1	1				1						1		3		1	32.44	-28.4	1	1	3	0.333333
Maputo	Inhambane	2			1	1	1	1	1	1		1	1	1		9		1	32.62	-27.8	2	1	3	0.333333
Inhambane	Vilankulo	3			1		1		1	1	1	1	1	1		8		4	32.69	-27.52	3	1	3	1.33333
Vilankulo	Beira	4			1									1		1		1	32.6727	-27.5175	4	1	3	0.333333
																		1	32.91	-26.75	5	1	3	0.333333
																		1	34.587	-24.8392	6	2	9	0.111111
																		11	35.21	-24.51	7	2	9	1.22222
Location	lat	lon																15	35.21	-24.51	8	2	9	1.66667
Durban	-29.8587	31.0218																1	35.21	-24.51	9	2	9	0.111111
Maputo	-25.892	32.6051																1	35.21	-24.51	10	2	9	0.111111
Zavora	-24.52	35.2036																1	35.4435	-24.215	11	2	9	0.111111
Praia do Tofo	-23.8569	35.548																2	35.452	-24.2113	12	2	9	0.222222
Pomene	-22.9052	35.5565																1	35.4542	-24.204	13	2	9	0.111111
Vilankulo	-21.9997	35.3192																1	35.484	-24.1888	14	2	9	0.111111
																		1	35.4717	-24.1775	15	2	9	0.111111
																		1	35.4945	-24.1363	16	2	9	0.111111
																		6	35.48	-24.056	17	2	9	0.666667
																		2	35.48	-24.056	18	2	9	0.222222
																		4	35.5042	-24.0507	19	2	9	0.444444
																		2	35.5115	-24.033	20	2	9	0.222222
																		2	35.5187	-23.985	21	2	9	0.222222
																		25	35.5255	-23.9713	22	2	9	2.77778
																		5	35.5602	-23.8842	23	2	9	0.555556
																		25	35.5698	-23.8822	24	2	9	2.77778
																		2	35.555	-23.88	25	2	9	0.222222
																		7	35.555	-23.88	26	2	9	0.777778
																		50	35.5477	-23.8445	27	2	9	5.55556
																		1	35.5395	-23.7908	28	2	9	0.111111
																		1	35.4412	-23.6433	29	3	8	0.125
																		1	35.45	-23.6	30	3	8	0.125
																		2	35.4768	-23.393	31	3	8	0.25
																		1	35.484	-23.3685	32	3	8	0.125
																		1	35.5027	-23.309	33	3	8	0.125
																		4	35.5025	-23.2903	34	3	8	0.5
																		1	35.5083	-23.2792	35	3	8	0.125
																		1	35.5042	-23.194	36	3	8	0.125
																		3	35.577	-23.0012	37	3	8	0.375
																		16	35.6208	-22.9583	38	3	8	2
																		1	35.63	-22.915	39	3	8	0.125
																		1	35.6055	-22.9113	40	3	8	0.125
																		2	35.134	-21.2368	41	4	1	2

## Sheet: Gill nets in Tofo
wkt_geom	Date	name	type	gpxx_Waypo	wptx1_Wayp	ctx_Creati	XCOORD	YCOORD	year			year	count	surveys	net per survey	%		year	nets	km	nets per km	kms per net
Point (35.54742998443543911 -23.84489597752690315)	2012-03-21	Gill net, Jellyfish	user	<gpxx:DisplayMode>SymbolAndName</gpxx:DisplayMode>	<wptx1:DisplayMode>SymbolAndName</wptx1:DisplayMode>		35.5474	-23.8449	2012			2012	7	256	0.0273438	2.73438		2012	7	7336.05	0.000954192	1048.01	0.954192
Point (35.54707098752260208 -23.84399550966918468)	2012-03-23	Gill net x2	user	<gpxx:DisplayMode>SymbolAndName</gpxx:DisplayMode>	<wptx1:DisplayMode>SymbolAndName</wptx1:DisplayMode>		35.5471	-23.844	2012			2013	8	321	0.0249221	2.49221		2013	8	8910.39	0.000897828	1113.8	0.897828
Point (35.54708573967218399 -23.85224699042737484)	2012-07-23	Gill net	user	<gpxx:DisplayMode>SymbolAndName</gpxx:DisplayMode>	<wptx1:DisplayMode>SymbolAndName</wptx1:DisplayMode>	<ctx:CreationTime>2012-07-23T12:26:10Z</ctx:CreationTime>	35.5471	-23.8522	2012			2014	15	464	0.0323276	3.23276		2014	15	6391.73	0.00234678	426.115	2.34678
Point (35.52956588566303253 -23.9203885942697525)	2012-08-16	Gill net	user	<gpxx:DisplayMode>SymbolAndName</gpxx:DisplayMode>	<wptx1:DisplayMode>SymbolAndName</wptx1:DisplayMode>		35.5296	-23.9204	2012			2015	36	282	0.12766	12.766		2015	36	5593.36	0.0064362	155.371	6.4362	6.74519
Point (35.53003703244030476 -23.91669795848429203)	2012-10-22	Gill net	user	<gpxx:DisplayMode>SymbolAndName</gpxx:DisplayMode>	<wptx1:DisplayMode>SymbolAndName</wptx1:DisplayMode>	<ctx:CreationTime>2012-10-22T16:04:34Z</ctx:CreationTime>	35.53	-23.9167	2012
Point (35.53216100670397282 -23.92659204080700874)	2012-11-19	Gill net	user	<gpxx:DisplayMode>SymbolAndName</gpxx:DisplayMode>	<wptx1:DisplayMode>SymbolAndName</wptx1:DisplayMode>	<ctx:CreationTime>2012-11-19T16:21:20Z</ctx:CreationTime>	35.5322	-23.9266	2012
Point (35.53125115111470222 -23.92625659704208374)	2012-12-20	Gill net	user	<gpxx:DisplayMode>SymbolAndName</gpxx:DisplayMode>	<wptx1:DisplayMode>SymbolAndName</wptx1:DisplayMode>	<ctx:CreationTime>2012-12-20T13:17:21Z</ctx:CreationTime>	35.5313	-23.9263	2012
Point (35.51790003664791584 -23.95675959996879101)	2013-07-02	Gill net		<gpxx:DisplayMode>SymbolAndName</gpxx:DisplayMode>	<wptx1:DisplayMode>SymbolAndName</wptx1:DisplayMode>	<ctx:CreationTime>2013-07-02T10:36:12Z</ctx:CreationTime>	35.5179	-23.9568	2013
Point (35.54504726082086563 -23.83972291834652424)	2013-09-09	Gill net		<gpxx:DisplayMode>SymbolAndName</gpxx:DisplayMode>	<wptx1:DisplayMode>SymbolAndName</wptx1:DisplayMode>	<ctx:CreationTime>2013-09-09T13:38:18Z</ctx:CreationTime>	35.545	-23.8397	2013
Point (35.53252117708325386 -23.92387035302817822)	2013-11-08	Gill net		<gpxx:DisplayMode>SymbolAndName</gpxx:DisplayMode>	<wptx1:DisplayMode>SymbolAndName</wptx1:DisplayMode>	<ctx:CreationTime>2013-11-08T11:34:46Z</ctx:CreationTime>	35.5325	-23.9239	2013
Point (35.55241051129996777 -23.84831428527832031)	2013-09-17	Gill net		<gpxx:DisplayMode>SymbolAndName</gpxx:DisplayMode>	<wptx1:DisplayMode>SymbolAndName</wptx1:DisplayMode>	<ctx:CreationTime>2013-09-17T13:48:08Z</ctx:CreationTime>	35.5524	-23.8483	2013
Point (35.52971189841628075 -23.92075790092349052)	2013-09-19	Gill net		<gpxx:DisplayMode>SymbolAndName</gpxx:DisplayMode>	<wptx1:DisplayMode>SymbolAndName</wptx1:DisplayMode>	<ctx:CreationTime>2013-09-19T15:03:24Z</ctx:CreationTime>	35.5297	-23.9208	2013
Point (35.53463174030184746 -23.92482555471360683)	2013-11-20	Gill net		<gpxx:DisplayMode>SymbolAndName</gpxx:DisplayMode>	<wptx1:DisplayMode>SymbolAndName</wptx1:DisplayMode>	<ctx:CreationTime>2013-11-20T15:21:12Z</ctx:CreationTime>	35.5346	-23.9248	2013
Point (35.53199026733636856 -23.92421828582882881)	2013-06-27	Gill net		<gpxx:DisplayMode>SymbolAndName</gpxx:DisplayMode>	<wptx1:DisplayMode>SymbolAndName</wptx1:DisplayMode>	<ctx:CreationTime>2013-06-27T12:23:26Z</ctx:CreationTime>	35.532	-23.9242	2013
Point (35.54940844886004925 -23.88156755827367306)	2013-08-16	Gill net & Buoy		<gpxx:DisplayMode>SymbolAndName</gpxx:DisplayMode>	<wptx1:DisplayMode>SymbolAndName</wptx1:DisplayMode>	<ctx:CreationTime>2013-08-16T16:25:59Z</ctx:CreationTime>	35.5494	-23.8816	2013
Point (35.53436527960002422 -23.90806593932211399)	2014-03-07	Gill net	user	<gpxx:DisplayMode>SymbolAndName</gpxx:DisplayMode>	<wptx1:DisplayMode>SymbolAndName</wptx1:DisplayMode>	<ctx:CreationTime>2014-03-07T13:12:29Z</ctx:CreationTime>	35.5344	-23.9081	2014
Point (35.53271446377038956 -23.91266182065010071)	2014-03-20	Gill net	user	<gpxx:DisplayMode>SymbolAndName</gpxx:DisplayMode>	<wptx1:DisplayMode>SymbolAndName</wptx1:DisplayMode>	<ctx:CreationTime>2014-03-20T12:36:59Z</ctx:CreationTime>	35.5327	-23.9127	2014
Point (35.53300539962947369 -23.91293481923639774)	2014-03-07	Gill net	user	<gpxx:DisplayMode>SymbolAndName</gpxx:DisplayMode>	<wptx1:DisplayMode>SymbolAndName</wptx1:DisplayMode>	<ctx:CreationTime>2014-03-07T13:12:46Z</ctx:CreationTime>	35.533	-23.9129	2014
Point (35.53139599040150642 -23.91897641122341156)	2014-03-20	Gill net	user	<gpxx:DisplayMode>SymbolAndName</gpxx:DisplayMode>	<wptx1:DisplayMode>SymbolAndName</wptx1:DisplayMode>	<ctx:CreationTime>2014-03-20T12:37:20Z</ctx:CreationTime>	35.5314	-23.919	2014
Point (35.5312101636081934 -23.92057090066373348)	2014-03-07	Gill net	user	<gpxx:DisplayMode>SymbolAndName</gpxx:DisplayMode>	<wptx1:DisplayMode>SymbolAndName</wptx1:DisplayMode>	<ctx:CreationTime>2014-03-07T13:13:07Z</ctx:CreationTime>	35.5312	-23.9206	2014
Point (35.55547082796692848 -23.8537142425775528)	2014-03-20	Gill net	user	<gpxx:DisplayMode>SymbolAndName</gpxx:DisplayMode>	<wptx1:DisplayMode>SymbolAndName</wptx1:DisplayMode>	<ctx:CreationTime>2014-03-20T12:38:17Z</ctx:CreationTime>	35.5555	-23.8537	2014
Point (35.53052376955747604 -23.92947684042155743)	2014-03-07	Gill net	user	<gpxx:DisplayMode>SymbolAndName</gpxx:DisplayMode>	<wptx1:DisplayMode>SymbolAndName</wptx1:DisplayMode>	<ctx:CreationTime>2014-03-07T13:13:58Z</ctx:CreationTime>	35.5305	-23.9295	2014
Point (35.52443590946495533 -23.94109725952148438)	2014-03-07	Gill net	user	<gpxx:DisplayMode>SymbolAndName</gpxx:DisplayMode>	<wptx1:DisplayMode>SymbolAndName</wptx1:DisplayMode>	<ctx:CreationTime>2014-03-07T13:14:23Z</ctx:CreationTime>	35.5244	-23.9411	2014
Point (35.52132169716060162 -23.94635212607681751)	2014-03-07	Gill net	user	<gpxx:DisplayMode>SymbolAndName</gpxx:DisplayMode>	<wptx1:DisplayMode>SymbolAndName</wptx1:DisplayMode>	<ctx:CreationTime>2014-03-07T13:14:47Z</ctx:CreationTime>	35.5213	-23.9464	2014
Point (35.51711113192141056 -23.95827865228056908)	2014-03-07	Gill net	user	<gpxx:DisplayMode>SymbolAndName</gpxx:DisplayMode>	<wptx1:DisplayMode>SymbolAndName</wptx1:DisplayMode>	<ctx:CreationTime>2014-03-07T13:15:39Z</ctx:CreationTime>	35.5171	-23.9583	2014
Point (35.51511925645172596 -23.96364248357713223)	2014-03-07	Gill net	user	<gpxx:DisplayMode>SymbolAndName</gpxx:DisplayMode>	<wptx1:DisplayMode>SymbolAndName</wptx1:DisplayMode>	<ctx:CreationTime>2014-03-07T13:16:01Z</ctx:CreationTime>	35.5151	-23.9636	2014
Point (35.53011598996818066 -23.9171660877764225)	2014-03-04	Gill net	user	<gpxx:DisplayMode>SymbolAndName</gpxx:DisplayMode>	<wptx1:DisplayMode>SymbolAndName</wptx1:DisplayMode>	<ctx:CreationTime>2014-03-04T11:46:49Z</ctx:CreationTime>	35.5301	-23.9172	2014
Point (35.53263785317540169 -23.90990367159247398)	2014-03-04	Gill net	user	<gpxx:DisplayMode>SymbolAndName</gpxx:DisplayMode>	<wptx1:DisplayMode>SymbolAndName</wptx1:DisplayMode>	<ctx:CreationTime>2014-03-04T11:47:12Z</ctx:CreationTime>	35.5326	-23.9099	2014
Point (35.55829485878348351 -23.84275716729462147)	2014-09-16	Gill net	user	<gpxx:DisplayMode>SymbolAndName</gpxx:DisplayMode>	<wptx1:DisplayMode>SymbolAndName</wptx1:DisplayMode>	<ctx:CreationTime>2014-09-16T15:08:00Z</ctx:CreationTime>	35.5583	-23.8428	2014
Point (35.52992966026067734 -23.92116107046604156)	2014-05-21	Gill net	user	<gpxx:DisplayMode>SymbolAndName</gpxx:DisplayMode>	<wptx1:DisplayMode>SymbolAndName</wptx1:DisplayMode>	<ctx:CreationTime>2014-05-21T15:31:01Z</ctx:CreationTime>	35.5299	-23.9212	2014
Point (35.53004750981926918 -23.92282747663557529)	2015-07-16	Gill net	user	<gpxx:DisplayMode>SymbolAndName</gpxx:DisplayMode>	<wptx1:DisplayMode>SymbolAndName</wptx1:DisplayMode>	<ctx:CreationTime>2015-07-16T06:28:26Z</ctx:CreationTime>	35.53	-23.9228	2015
Point (35.53079115226864815 -23.92463101074099541)	2015-07-16	Gill net	user	<gpxx:DisplayMode>SymbolAndName</gpxx:DisplayMode>	<wptx1:DisplayMode>SymbolAndName</wptx1:DisplayMode>	<ctx:CreationTime>2015-07-16T06:29:13Z</ctx:CreationTime>	35.5308	-23.9246	2015
Point (35.53431750275194645 -23.90745028853416443)	2015-07-16	Gill net	user	<gpxx:DisplayMode>SymbolAndName</gpxx:DisplayMode>	<wptx1:DisplayMode>SymbolAndName</wptx1:DisplayMode>	<ctx:CreationTime>2015-07-16T14:40:51Z</ctx:CreationTime>	35.5343	-23.9075	2015
Point (35.53413595072925091 -23.91556581482291222)	2015-06-25	Gill net	user	<gpxx:DisplayMode>SymbolAndName</gpxx:DisplayMode>	<wptx1:DisplayMode>SymbolAndName</wptx1:DisplayMode>	<ctx:CreationTime>2015-06-25T15:45:50Z</ctx:CreationTime>	35.5341	-23.9156	2015
Point (35.53365424275398254 -23.92146558500826359)	2015-06-26	Gill net	user	<gpxx:DisplayMode>SymbolAndName</gpxx:DisplayMode>	<wptx1:DisplayMode>SymbolAndName</wptx1:DisplayMode>	<ctx:CreationTime>2015-06-26T11:17:55Z</ctx:CreationTime>	35.5337	-23.9215	2015
Point (35.5472099594771862 -23.84338706731796265)	2015-02-27	Gill net	user	<gpxx:DisplayMode>SymbolAndName</gpxx:DisplayMode>	<wptx1:DisplayMode>SymbolAndName</wptx1:DisplayMode>	<ctx:CreationTime>2015-02-27T13:24:36Z</ctx:CreationTime>	35.5472	-23.8434	2015
Point (35.53294186480343342 -23.91010290943086147)	2015-07-16	Gill net	user	<gpxx:DisplayMode>SymbolAndName</gpxx:DisplayMode>	<wptx1:DisplayMode>SymbolAndName</wptx1:DisplayMode>	<ctx:CreationTime>2015-07-16T14:41:15Z</ctx:CreationTime>	35.5329	-23.9101	2015
Point (35.53080263547599316 -23.9222786296159029)	2015-06-25	Gill net	user	<gpxx:DisplayMode>SymbolAndName</gpxx:DisplayMode>	<wptx1:DisplayMode>SymbolAndName</wptx1:DisplayMode>	<ctx:CreationTime>2015-06-25T15:46:15Z</ctx:CreationTime>	35.5308	-23.9223	2015
Point (35.53100371733307838 -23.92314473167061806)	2015-06-26	Gill net	user	<gpxx:DisplayMode>SymbolAndName</gpxx:DisplayMode>	<wptx1:DisplayMode>SymbolAndName</wptx1:DisplayMode>	<ctx:CreationTime>2015-06-26T11:23:21Z</ctx:CreationTime>	35.531	-23.9231	2015
Point (35.53065595217049122 -23.93032223917543888)	2015-02-27	Gill net	user	<gpxx:DisplayMode>SymbolAndName</gpxx:DisplayMode>	<wptx1:DisplayMode>SymbolAndName</wptx1:DisplayMode>	<ctx:CreationTime>2015-02-27T13:25:58Z</ctx:CreationTime>	35.5307	-23.9303	2015
Point (35.52927318960428238 -23.93520981073379517)	2015-02-27	Gill net	user	<gpxx:DisplayMode>SymbolAndName</gpxx:DisplayMode>	<wptx1:DisplayMode>SymbolAndName</wptx1:DisplayMode>	<ctx:CreationTime>2015-02-27T13:26:44Z</ctx:CreationTime>	35.5293	-23.9352	2015
Point (35.54319536313414574 -23.83646604605019093)	2015-04-16	Gill net	user	<gpxx:DisplayMode>SymbolAndName</gpxx:DisplayMode>	<wptx1:DisplayMode>SymbolAndName</wptx1:DisplayMode>	<ctx:CreationTime>2015-04-16T13:01:27Z</ctx:CreationTime>	35.5432	-23.8365	2015
Point (35.54860889911651611 -23.84960182942450047)	2015-04-16	Gill net	user	<gpxx:DisplayMode>SymbolAndName</gpxx:DisplayMode>	<wptx1:DisplayMode>SymbolAndName</wptx1:DisplayMode>	<ctx:CreationTime>2015-04-16T13:02:11Z</ctx:CreationTime>	35.5486	-23.8496	2015
Point (35.53877860307693481 -23.90149469487369061)	2015-01-29	Gill net	user	<gpxx:DisplayMode>SymbolAndName</gpxx:DisplayMode>	<wptx1:DisplayMode>SymbolAndName</wptx1:DisplayMode>	<ctx:CreationTime>2015-01-29T09:28:02Z</ctx:CreationTime>	35.5388	-23.9015	2015
Point (35.53126883693039417 -23.9235195703804493)	2015-07-22	Gill net	user	<gpxx:DisplayMode>SymbolAndName</gpxx:DisplayMode>	<wptx1:DisplayMode>SymbolAndName</wptx1:DisplayMode>	<ctx:CreationTime>2015-07-22T14:00:58Z</ctx:CreationTime>	35.5313	-23.9235	2015
Point (35.55448662489652634 -23.89489025808870792)	2015-10-07	Gill net	user	<gpxx:DisplayMode>SymbolAndName</gpxx:DisplayMode>	<wptx1:DisplayMode>SymbolAndName</wptx1:DisplayMode>	<ctx:CreationTime>2015-10-07T13:19:40Z</ctx:CreationTime>	35.5545	-23.8949	2015
Point (35.55233616381883621 -23.84865853004157543)	2015-05-11	Gill net	user	<gpxx:DisplayMode>SymbolAndName</gpxx:DisplayMode>	<wptx1:DisplayMode>SymbolAndName</wptx1:DisplayMode>	<ctx:CreationTime>2015-05-11T09:10:30Z</ctx:CreationTime>	35.5523	-23.8487	2015
Point (35.54473738186061382 -23.8417875487357378)	2015-08-13	Gill net	user	<gpxx:DisplayMode>SymbolAndName</gpxx:DisplayMode>	<wptx1:DisplayMode>SymbolAndName</wptx1:DisplayMode>	<ctx:CreationTime>2015-08-13T10:25:14Z</ctx:CreationTime>	35.5447	-23.8418	2015
Point (35.53149489685893059 -23.91912695020437241)	2015-02-12	Gill net	user	<gpxx:DisplayMode>SymbolAndName</gpxx:DisplayMode>	<wptx1:DisplayMode>SymbolAndName</wptx1:DisplayMode>	<ctx:CreationTime>2015-02-12T12:07:18Z</ctx:CreationTime>	35.5315	-23.9191	2015
Point (35.54591168649494648 -23.84318615309894085)	2015-04-13	Gill net	user	<gpxx:DisplayMode>SymbolAndName</gpxx:DisplayMode>	<wptx1:DisplayMode>SymbolAndName</wptx1:DisplayMode>	<ctx:CreationTime>2015-04-13T13:55:52Z</ctx:CreationTime>	35.5459	-23.8432	2015
Point (35.53614936769008636 -23.90273471362888813)	2015-05-13	Gill net	user	<gpxx:DisplayMode>SymbolAndName</gpxx:DisplayMode>	<wptx1:DisplayMode>SymbolAndName</wptx1:DisplayMode>	<ctx:CreationTime>2015-05-13T13:14:04Z</ctx:CreationTime>	35.5361	-23.9027	2015
Point (35.54640345275402069 -23.8491968996822834)	2015-07-14	Gill net	user	<gpxx:DisplayMode>SymbolAndName</gpxx:DisplayMode>	<wptx1:DisplayMode>SymbolAndName</wptx1:DisplayMode>	<ctx:CreationTime>2015-07-14T10:01:39Z</ctx:CreationTime>	35.5464	-23.8492	2015
Point (35.53093372844159603 -23.92086644656956196)	2015-06-15	Gill net	user	<gpxx:DisplayMode>SymbolAndName</gpxx:DisplayMode>	<wptx1:DisplayMode>SymbolAndName</wptx1:DisplayMode>	<ctx:CreationTime>2015-06-15T13:56:46Z</ctx:CreationTime>	35.5309	-23.9209	2015
Point (35.53053315728902817 -23.92143993638455868)	2015-07-15	Gill net	user	<gpxx:DisplayMode>SymbolAndName</gpxx:DisplayMode>	<wptx1:DisplayMode>SymbolAndName</wptx1:DisplayMode>	<ctx:CreationTime>2015-07-15T14:42:39Z</ctx:CreationTime>	35.5305	-23.9214	2015
Point (35.53132424131035805 -23.92686604522168636)	2015-10-07	Gill net	user	<gpxx:DisplayMode>SymbolAndName</gpxx:DisplayMode>	<wptx1:DisplayMode>SymbolAndName</wptx1:DisplayMode>	<ctx:CreationTime>2015-10-07T13:20:33Z</ctx:CreationTime>	35.5313	-23.9269	2015
Point (35.54566249251365662 -23.84453069418668747)	2015-06-18	Gill net	user	<gpxx:DisplayMode>SymbolAndName</gpxx:DisplayMode>	<wptx1:DisplayMode>SymbolAndName</wptx1:DisplayMode>	<ctx:CreationTime>2015-06-18T15:07:04Z</ctx:CreationTime>	35.5457	-23.8445	2015
Point (35.56501219980418682 -23.78439456224441528)	2015-02-19	Gill net	user	<gpxx:DisplayMode>SymbolAndName</gpxx:DisplayMode>	<wptx1:DisplayMode>SymbolAndName</wptx1:DisplayMode>	<ctx:CreationTime>2015-02-19T14:05:52Z</ctx:CreationTime>	35.565	-23.7844	2015
Point (35.54640303365886211 -23.84968246333301067)	2015-03-20	Gill net	user	<gpxx:DisplayMode>SymbolAndName</gpxx:DisplayMode>	<wptx1:DisplayMode>SymbolAndName</wptx1:DisplayMode>	<ctx:CreationTime>2015-03-20T11:18:10Z</ctx:CreationTime>	35.5464	-23.8497	2015
Point (35.54766492918133736 -23.84578152559697628)	2015-04-20	Gill net	user	<gpxx:DisplayMode>SymbolAndName</gpxx:DisplayMode>	<wptx1:DisplayMode>SymbolAndName</wptx1:DisplayMode>	<ctx:CreationTime>2015-04-20T13:37:34Z</ctx:CreationTime>	35.5477	-23.8458	2015
Point (35.55057001300156116 -23.84238685481250286)	2015-06-23	Gill net	user	<gpxx:DisplayMode>SymbolAndName</gpxx:DisplayMode>	<wptx1:DisplayMode>SymbolAndName</wptx1:DisplayMode>	<ctx:CreationTime>2015-06-23T14:12:29Z</ctx:CreationTime>	35.5506	-23.8424	2015
Point (35.53184266202151775 -23.91053960658609867)	2015-02-26	Gill net	user	<gpxx:DisplayMode>SymbolAndName</gpxx:DisplayMode>	<wptx1:DisplayMode>SymbolAndName</wptx1:DisplayMode>	<ctx:CreationTime>2015-02-26T13:30:39Z</ctx:CreationTime>	35.5318	-23.9105	2015
Point (35.52709766663610935 -23.93682173453271389)	2015-01-29	Gill net	user	<gpxx:DisplayMode>SymbolAndName</gpxx:DisplayMode>	<wptx1:DisplayMode>SymbolAndName</wptx1:DisplayMode>	<ctx:CreationTime>2015-01-29T09:28:49Z</ctx:CreationTime>	35.5271	-23.9368	2015
Point (35.53490348160266876 -23.92052614130079746)	2015-06-29	Gill net	user	<gpxx:DisplayMode>SymbolAndName</gpxx:DisplayMode>	<wptx1:DisplayMode>SymbolAndName</wptx1:DisplayMode>	<ctx:CreationTime>2015-06-29T15:38:20Z</ctx:CreationTime>	35.5349	-23.9205	2015
Point (35.50363479182124138 -23.98988722823560238)	2015-05-27	Gill net (installed by 2 x spear fishers)	user	<gpxx:DisplayMode>SymbolAndName</gpxx:DisplayMode>	<wptx1:DisplayMode>SymbolAndName</wptx1:DisplayMode>	<ctx:CreationTime>2015-05-27T13:46:45Z</ctx:CreationTime>	35.5036	-23.9899	2015
Point (35.53098879754543304 -23.92081372439861298)	2015-05-27	Gill net perpendicular to shore	user	<gpxx:DisplayMode>SymbolAndName</gpxx:DisplayMode>	<wptx1:DisplayMode>SymbolAndName</wptx1:DisplayMode>	<ctx:CreationTime>2015-05-27T13:45:58Z</ctx:CreationTime>	35.531	-23.9208	2015
Point (35.55268719792366028 -23.8796025887131691)	2015-05-15	Spear fisher + gill nets	user	<gpxx:DisplayMode>SymbolAndName</gpxx:DisplayMode>	<wptx1:DisplayMode>SymbolAndName</wptx1:DisplayMode>	<ctx:CreationTime>2015-05-15T11:12:24Z</ctx:CreationTime>	35.5527	-23.8796	2015

## Sheet: Gill net aerial surveys
Description	lat	lon	index
2 x gill nets	-24.2475	35.4168	flight1
Gill net	-23.3353	35.4932	flight1
Gill Net & turtle	-24.1668	35.4776	flight1
Gill Net & turtle, & shark	-24.1688	35.4754	flight1
Gill Net, 3 x spear fishermen	-23.3772	35.4777	flight1
Gill Nets	-23.8459	35.5503	flight1
Gill nets	-23.7766	35.5187	flight1
Gill Nets setting	-23.844	35.5469	flight1
Gill nets x 2	-24.5164	35.2052	flight1
Gill nets x 2	-24.5269	35.2055	flight1
Gill Nets	-22.8539	35.5507	flight2
Gill nets, 3 Turtles, Eagle Ray, 12 dolphins	-22.7597	35.5185	flight2

## Sheet: Raw tracks
Shark	ECOCEAN	Lat	Long	Date	Time	Date_Time	Quality	LatR	LonR	Step length
70811	MZ-421	-23.8731	35.5569	11.11.10	13:41:43	11.11.10 13:41:43	2	-0.416663	0.620586	NaN
70811	MZ-421	-23.8578	35.5567	11.11.10	14:51:24	11.11.10 14:51:24	2	-0.416397	0.620581	1.69905
70811	MZ-421	-23.86	35.5628	11.11.10	15:08:42	11.11.10 15:08:42	1	-0.416436	0.620688	0.668779
70811	MZ-421	-23.8533	35.5492	11.11.10	16:48:37	11.11.10 16:48:37	1	-0.416319	0.62045	1.57018
70811	MZ-421	-23.8114	35.5344	12.11.10	02:10:46	12.11.10 02:10:46	1	-0.415587	0.620193	4.8985
70811	MZ-421	-23.7658	35.5406	12.11.10	05:56:01	12.11.10 05:56:01	2	-0.414792	0.6203	5.10357
70811	MZ-421	-23.7642	35.5153	12.11.10	06:56:17	12.11.10 06:56:17	3	-0.414763	0.619859	2.57909
70811	MZ-421	-23.7547	35.5194	12.11.10	07:03:39	12.11.10 07:03:39	2	-0.414598	0.619931	1.13255
70811	MZ-421	-23.7767	35.5075	12.11.10	07:37:17	12.11.10 07:37:17	2	-0.414981	0.619723	2.72611
70811	MZ-421	-23.7653	35.5772	13.11.10	02:04:46	13.11.10 02:04:46	1	-0.414782	0.62094	7.20718
70811	MZ-421	-23.7722	35.5406	13.11.10	02:27:59	13.11.10 02:27:59	2	-0.414904	0.6203	3.81038
70811	MZ-421	-23.7956	35.5561	13.11.10	03:32:10	13.11.10 03:32:10	2	-0.415311	0.620571	3.03923
70811	MZ-421	-23.8164	35.5431	13.11.10	05:14:45	13.11.10 05:14:45	2	-0.415674	0.620343	2.67031
70811	MZ-421	-23.8103	35.5478	13.11.10	05:43:55	13.11.10 05:43:55	3	-0.415568	0.620426	0.832179
70811	MZ-421	-23.8067	35.5692	13.11.10	06:33:14	13.11.10 06:33:14	1	-0.415505	0.620799	2.21268
70811	MZ-421	-23.9453	35.5331	14.11.10	02:20:59	14.11.10 02:20:59	1	-0.417924	0.620169	15.8442
70811	MZ-421	-23.9478	35.5281	14.11.10	03:10:10	14.11.10 03:10:10	2	-0.417968	0.620082	0.579191
70811	MZ-421	-24.0114	35.5144	14.11.10	09:44:32	14.11.10 09:44:32	1	-0.419078	0.619844	7.20714
70811	MZ-421	-23.9908	35.5056	14.11.10	12:40:20	14.11.10 12:40:20	2	-0.418719	0.619689	2.45756
70811	MZ-421	-23.9894	35.5022	14.11.10	13:09:41	14.11.10 13:09:41	2	-0.418695	0.619631	0.372186
71223	MZ-562	-23.8697	35.5594	02.02.11	12:55:00	02.02.11 12:55:00	GPS	-0.416605	0.620629	NaN
71223	MZ-562	-24.0683	36.1411	03.02.11	06:13:55	03.02.11 06:13:55	1	-0.420072	0.630781	63.0922
71223	MZ-562	-24.0592	36.1406	03.02.11	06:15:39	03.02.11 06:15:39	1	-0.419912	0.630772	1.02085
71223	MZ-562	-24.0947	36.2014	03.02.11	07:51:58	03.02.11 07:51:58	1	-0.420532	0.631833	7.33294
71223	MZ-562	-24.6025	36.8297	04.02.11	06:03:37	04.02.11 06:03:37	2	-0.429395	0.6428	85.0861
71223	MZ-562	-24.645	36.8797	04.02.11	07:29:13	04.02.11 07:29:13	2	-0.430136	0.643673	6.91936
71223	MZ-562	-24.6506	36.8931	04.02.11	07:45:07	04.02.11 07:45:07	1	-0.430233	0.643905	1.48237
71223	MZ-562	-24.6981	36.925	04.02.11	09:44:43	04.02.11 09:44:43	1	-0.431062	0.644463	6.18993
71223	MZ-562	-25.0764	37.7611	05.02.11	04:54:43	05.02.11 04:54:43	3	-0.437666	0.659056	94.2474
71223	MZ-562	-25.0856	37.7958	05.02.11	05:53:49	05.02.11 05:53:49	2	-0.437826	0.659662	3.64241
71223	MZ-562	-25.0872	37.8214	05.02.11	07:06:14	05.02.11 07:06:14	2	-0.437855	0.660108	2.58026
71223	MZ-562	-25.0836	37.8467	05.02.11	07:32:17	05.02.11 07:32:17	2	-0.437792	0.660549	2.57711
71223	MZ-562	-25.085	37.8556	05.02.11	07:47:32	05.02.11 07:47:32	1	-0.437816	0.660704	0.908403
71223	MZ-562	-25.0917	37.8858	05.02.11	08:47:02	05.02.11 08:47:02	1	-0.437932	0.661233	3.13792
71223	MZ-562	-25.1047	37.9003	05.02.11	09:24:13	05.02.11 09:24:13	1	-0.43816	0.661485	2.055
70810	MZ-286	-23.9061	35.5494	19.07.11	13:49:00	19.07.11 13:49:00	1	-0.41724	0.620455	NaN
70810	MZ-286	-23.9111	35.5414	19.07.11	13:50:37	19.07.11 13:50:37	2	-0.417328	0.620314	0.989781
70810	MZ-286	-23.8892	35.5544	19.07.11	15:29:17	19.07.11 15:29:17	2	-0.416945	0.620542	2.77771
70810	MZ-286	-23.8897	35.5564	19.07.11	16:26:07	19.07.11 16:26:07	1	-0.416954	0.620576	0.207117
70810	MZ-286	-23.8772	35.5569	19.07.11	18:43:51	19.07.11 18:43:51	2	-0.416736	0.620586	1.39108
70810	MZ-286	-23.8611	35.5789	19.07.11	20:21:14	19.07.11 20:21:14	1	-0.416455	0.620969	2.86157
70810	MZ-286	-23.8608	35.5739	19.07.11	20:20:31	19.07.11 20:20:31	1	-0.41645	0.620881	0.509393
70810	MZ-286	-23.8469	35.5736	19.07.11	21:05:39	19.07.11 21:05:39	1	-0.416208	0.620877	1.54463
70810	MZ-286	-23.8442	35.5531	21.07.11	15:01:38	21.07.11 15:01:38	2	-0.416159	0.620518	2.11326
70810	MZ-286	-23.6072	35.5639	22.07.11	16:52:58	22.07.11 16:52:58	2	-0.412024	0.620707	26.3701
70810	MZ-286	-23.4247	35.5422	23.07.11	08:08:45	23.07.11 08:08:45	3	-0.408839	0.620329	20.413
70810	MZ-286	-23.4233	35.5428	23.07.11	08:08:08	23.07.11 08:08:08	3	-0.408814	0.620338	0.164512
70810	MZ-286	-23.3233	35.5019	23.07.11	14:50:10	23.07.11 14:50:10	1	-0.407069	0.619626	11.8749
70810	MZ-286	-23.3239	35.4975	23.07.11	14:52:54	23.07.11 14:52:54	2	-0.407079	0.619548	0.458
70810	MZ-286	-23.2914	35.4778	23.07.11	16:29:23	23.07.11 16:29:23	1	-0.406511	0.619204	4.13717
70810	MZ-286	-23.2419	35.5103	23.07.11	18:34:24	23.07.11 18:34:24	1	-0.405648	0.619771	6.4226
70810	MZ-286	-23.1219	35.5322	24.07.11	01:57:34	24.07.11 01:57:34	2	-0.403554	0.620154	13.5306
70810	MZ-286	-23.1156	35.5297	24.07.11	02:08:05	24.07.11 02:08:05	3	-0.403443	0.620111	0.755015
70810	MZ-286	-23.0953	35.5347	24.07.11	03:43:40	24.07.11 03:43:40	3	-0.403089	0.620198	2.31205
70810	MZ-286	-23.0511	35.5658	24.07.11	07:47:50	24.07.11 07:47:50	2	-0.402318	0.620741	5.85221
70810	MZ-286	-23.0481	35.5658	24.07.11	07:44:58	24.07.11 07:44:58	2	-0.402264	0.620741	0.339762
70810	MZ-286	-23.0275	35.5694	24.07.11	09:27:50	24.07.11 09:27:50	3	-0.401906	0.620804	2.31535
70810	MZ-286	-22.9833	35.5933	24.07.11	12:59:21	24.07.11 12:59:21	2	-0.401135	0.621221	5.4861
70810	MZ-286	-22.9556	35.6186	24.07.11	16:02:19	24.07.11 16:02:19	2	-0.40065	0.621662	4.02959
70810	MZ-286	-22.8536	35.5767	25.07.11	12:50:59	25.07.11 12:50:59	2	-0.398871	0.62093	12.1225
70810	MZ-286	-22.5097	35.5244	26.07.11	12:37:37	26.07.11 12:37:37	2	-0.392869	0.620019	38.6122
70810	MZ-286	-22.2592	35.5492	27.07.11	06:36:44	27.07.11 06:36:44	3	-0.388496	0.62045	27.9762
70810	MZ-286	-22.2542	35.5464	27.07.11	07:01:07	27.07.11 07:01:07	1	-0.388408	0.620402	0.62516
70810	MZ-286	-22.2319	35.5425	27.07.11	08:12:03	27.07.11 08:12:03	2	-0.388021	0.620334	2.5032
70810	MZ-286	-22.2297	35.5444	27.07.11	08:24:02	27.07.11 08:24:02	2	-0.387982	0.620368	0.317985
70810	MZ-286	-22.2286	35.5408	27.07.11	08:40:02	27.07.11 08:40:02	1	-0.387962	0.620305	0.39169
70810	MZ-286	-22.0583	35.5425	27.07.11	20:36:08	27.07.11 20:36:08	2	-0.384991	0.620334	18.9348
70810	MZ-286	-21.9483	35.5336	28.07.11	03:45:20	28.07.11 03:45:20	1	-0.383071	0.620179	12.2657
70810	MZ-286	-21.6728	35.4992	28.07.11	20:14:16	28.07.11 20:14:16	3	-0.378261	0.619577	30.846
71219	MZ-275	-23.9264	35.5336	22.07.11	14:53:09	22.07.11 14:53:09	3	-0.417594	0.620179	NaN
71219	MZ-275	-23.9261	35.5397	22.07.11	15:03:38	22.07.11 15:03:38	1	-0.417589	0.620285	0.621899
71219	MZ-275	-23.9278	35.5411	22.07.11	15:11:27	22.07.11 15:11:27	2	-0.417619	0.620309	0.232966
71219	MZ-275	-23.9214	35.5422	25.07.11	09:09:12	25.07.11 09:09:12	1	-0.417507	0.620329	0.719333
71219	MZ-275	-23.9414	35.5303	25.07.11	12:50:15	25.07.11 12:50:15	3	-0.417856	0.62012	2.53367
71219	MZ-275	-23.9544	35.5161	25.07.11	14:21:48	25.07.11 14:21:48	3	-0.418084	0.619873	2.04452
71219	MZ-275	-23.9908	35.505	25.07.11	15:41:42	25.07.11 15:41:42	3	-0.418719	0.619679	4.2008
71226	MZ-418	-23.8492	35.5558	09.08.11	13:22:28	09.08.11 13:22:28	3	-0.416246	0.620566	NaN
71226	MZ-418	-23.8453	35.5589	09.08.11	13:33:08	09.08.11 13:33:08	1	-0.416179	0.62062	0.532504
71226	MZ-418	-23.8289	35.5447	09.08.11	15:00:17	09.08.11 15:00:17	3	-0.415893	0.620372	2.32318
71226	MZ-418	-23.4744	35.4953	10.08.11	11:41:51	10.08.11 11:41:51	2	-0.409706	0.619509	39.7329
71226	MZ-418	-23.1556	35.5347	11.08.11	02:21:00	11.08.11 02:21:00	2	-0.404141	0.620198	35.6869
71226	MZ-418	-23.1411	35.5508	11.08.11	03:04:59	11.08.11 03:04:59	1	-0.403889	0.620479	2.30068
71226	MZ-418	-22.9664	35.6092	11.08.11	14:54:29	11.08.11 14:54:29	2	-0.400839	0.621497	20.3243
71226	MZ-418	-23.1817	35.5089	12.08.11	07:53:45	12.08.11 07:53:45	3	-0.404596	0.619747	26.0433
71226	MZ-418	-23.2	35.5158	12.08.11	08:37:22	12.08.11 08:37:22	2	-0.404916	0.619868	2.15861
71226	MZ-418	-23.2061	35.5189	12.08.11	08:48:10	12.08.11 08:48:10	2	-0.405023	0.619922	0.747845
71226	MZ-418	-23.7503	35.5158	13.08.11	06:54:51	13.08.11 06:54:51	3	-0.414521	0.619868	60.5094
71226	MZ-418	-23.7725	35.5378	13.08.11	07:29:22	13.08.11 07:29:22	1	-0.414908	0.620251	3.33066
71226	MZ-418	-23.7911	35.5442	13.08.11	08:14:07	13.08.11 08:14:07	3	-0.415233	0.620363	2.16917
71226	MZ-418	-23.7969	35.5425	13.08.11	08:37:01	13.08.11 08:37:01	1	-0.415335	0.620334	0.670436
71226	MZ-418	-23.8128	35.5406	13.08.11	09:08:49	13.08.11 09:08:49	1	-0.415611	0.6203	1.77167
71226	MZ-418	-24.295	35.3828	14.08.11	08:26:47	14.08.11 08:26:47	3	-0.424028	0.617546	55.9628
71226	MZ-418	-24.3022	35.3736	14.08.11	08:51:17	14.08.11 08:51:17	1	-0.424154	0.617386	1.22799
71226	MZ-418	-24.335	35.3572	14.08.11	10:34:32	14.08.11 10:34:32	1	-0.424726	0.6171	4.00522
71226	MZ-418	-24.4317	35.2561	15.08.11	08:11:37	15.08.11 08:11:37	1	-0.426413	0.615335	14.8459
71226	MZ-418	-24.0989	35.5028	16.08.11	02:46:11	16.08.11 02:46:11	2	-0.420605	0.61964	44.6596
71226	MZ-418	-24.09	35.4969	16.08.11	02:58:03	16.08.11 02:58:03	1	-0.42045	0.619539	1.15219
71226	MZ-418	-24.0919	35.5036	16.08.11	04:24:20	16.08.11 04:24:20	3	-0.420484	0.619655	0.710432
71226	MZ-418	-24.055	35.4928	17.08.11	06:06:07	17.08.11 06:06:07	3	-0.419839	0.619466	4.25272
71226	MZ-418	-24.0519	35.4947	18.08.11	03:39:07	18.08.11 03:39:07	3	-0.419786	0.6195	0.392963
71215	MZ-238	-23.87	35.5556	09.08.11	13:22:10	09.08.11 13:22:10	3	-0.41661	0.620562	NaN
71215	MZ-238	-23.8628	35.5653	09.08.11	13:32:57	09.08.11 13:32:57	2	-0.416484	0.620731	1.2737
71215	MZ-238	-23.8492	35.5592	09.08.11	14:58:50	09.08.11 14:58:50	2	-0.416246	0.620625	1.63611
71215	MZ-238	-23.8447	35.5517	09.08.11	15:13:51	09.08.11 15:13:51	1	-0.416169	0.620494	0.90887
71215	MZ-238	-24.2558	35.4569	11.08.11	07:17:08	11.08.11 07:17:08	2	-0.423344	0.61884	46.7144
71215	MZ-238	-24.2714	35.4336	11.08.11	09:00:46	11.08.11 09:00:46	1	-0.423616	0.618433	2.93032
71215	MZ-238	-24.2703	35.4314	11.08.11	09:55:04	11.08.11 09:55:04	3	-0.423596	0.618394	0.256917
71215	MZ-238	-24.1828	35.4519	13.08.11	14:19:38	13.08.11 14:19:38	1	-0.422069	0.618753	9.95032
71215	MZ-238	-24.1789	35.475	13.08.11	14:31:39	13.08.11 14:31:39	2	-0.422001	0.619156	2.37836
71215	MZ-238	-24.3042	35.3897	14.08.11	10:34:00	14.08.11 10:34:00	2	-0.424188	0.617667	16.3954
71215	MZ-238	-24.3	35.3833	14.08.11	12:41:03	14.08.11 12:41:03	3	-0.424115	0.617556	0.796156
71215	MZ-238	-24.2447	35.4503	15.08.11	08:27:12	15.08.11 08:27:12	1	-0.42315	0.618724	9.1558
71215	MZ-238	-24.2561	35.4328	15.08.11	12:29:11	15.08.11 12:29:11	3	-0.423349	0.618419	2.1798
71215	MZ-238	-24.2594	35.4525	16.08.11	06:59:50	16.08.11 06:59:50	2	-0.423407	0.618763	2.03345
71215	MZ-238	-24.1989	35.4569	16.08.11	12:20:36	16.08.11 12:20:36	2	-0.42235	0.61884	6.74853
71215	MZ-238	-24.1153	35.4858	17.08.11	04:00:23	17.08.11 04:00:23	1	-0.420891	0.619345	9.7482
71215	MZ-238	-23.8469	35.5503	17.08.11	15:13:43	17.08.11 15:13:43	1	-0.416208	0.620469	30.5472
71215	MZ-238	-23.8147	35.5589	17.08.11	18:05:13	17.08.11 18:05:13	1	-0.415645	0.62062	3.68845
71215	MZ-238	-23.9317	35.5458	18.08.11	13:38:39	18.08.11 13:38:39	1	-0.417686	0.620392	13.0712
71215	MZ-238	-23.8933	35.5433	18.08.11	15:03:01	18.08.11 15:03:01	1	-0.417017	0.620348	4.27004
71215	MZ-238	-23.1097	37.77	23.08.11	19:08:20	23.08.11 19:08:20	2	-0.403341	0.659211	243.196
71215	MZ-238	-23.1069	37.7664	23.08.11	19:56:18	23.08.11 19:56:18	2	-0.403292	0.659148	0.481457
71215	MZ-238	-23.1086	37.7644	23.08.11	19:56:18	23.08.11 19:56:18	2	-0.403321	0.659114	0.271833
71215	MZ-238	-23.1094	37.7647	23.08.11	20:48:35	23.08.11 20:48:35	3	-0.403336	0.659119	0.0969193
71215	MZ-238	-23.1075	37.7631	23.08.11	21:37:41	23.08.11 21:37:41	3	-0.403302	0.65909	0.275322
71215	MZ-238	-23.1083	37.7533	24.08.11	02:52:12	24.08.11 02:52:12	3	-0.403317	0.65892	0.998634
71215	MZ-238	-23.1022	37.7517	24.08.11	04:36:57	24.08.11 04:36:57	3	-0.40321	0.658891	0.700578
71215	MZ-238	-23.0958	37.7522	24.08.11	05:34:43	24.08.11 05:34:43	1	-0.403098	0.658901	0.712681
71215	MZ-238	-23.0989	37.7506	24.08.11	06:22:29	24.08.11 06:22:29	3	-0.403152	0.658871	0.380129
71215	MZ-238	-23.1017	37.7558	24.08.11	07:07:05	24.08.11 07:07:05	2	-0.4032	0.658964	0.621928
71215	MZ-238	-23.0989	37.7567	24.08.11	07:09:18	24.08.11 07:09:18	1	-0.403152	0.658978	0.320419
71214	MZ-241	-23.8786	35.5531	10.08.11	13:09:26	10.08.11 13:09:26	3	-0.41676	0.620518	NaN
71214	MZ-241	-23.8781	35.5594	10.08.11	13:22:40	10.08.11 13:22:40	2	-0.416751	0.620629	0.652536
71214	MZ-241	-23.9039	35.5367	10.08.11	14:50:20	10.08.11 14:50:20	3	-0.417202	0.620232	3.68974
71214	MZ-241	-23.8972	35.5383	10.08.11	15:03:39	10.08.11 15:03:39	2	-0.417085	0.620261	0.760416
71214	MZ-241	-23.8347	35.5406	11.08.11	08:14:35	11.08.11 08:14:35	2	-0.415994	0.6203	6.95336
71214	MZ-241	-23.8556	35.5636	11.08.11	09:54:41	11.08.11 09:54:41	3	-0.416358	0.620702	3.29616
71214	MZ-241	-23.9278	35.5467	11.08.11	12:58:31	11.08.11 12:58:31	2	-0.417619	0.620406	8.21344
71214	MZ-241	-24.0747	35.5128	12.08.11	02:13:23	12.08.11 02:13:23	2	-0.420183	0.619815	16.6982
71214	MZ-241	-24.0333	35.4958	12.08.11	13:02:55	12.08.11 13:02:55	2	-0.419461	0.619519	4.91332
71214	MZ-241	-24.0183	35.5078	12.08.11	14:29:29	12.08.11 14:29:29	3	-0.419199	0.619728	2.06242
71214	MZ-241	-24.0172	35.5103	12.08.11	14:40:18	12.08.11 14:40:18	3	-0.41918	0.619771	0.282382
71214	MZ-241	-24.0161	35.5094	12.08.11	15:07:48	12.08.11 15:07:48	1	-0.41916	0.619757	0.149762
71214	MZ-241	-23.7122	35.5636	14.08.11	10:34:54	14.08.11 10:34:54	1	-0.413856	0.620702	34.2369
71214	MZ-241	-23.6436	35.5525	14.08.11	14:07:47	14.08.11 14:07:47	1	-0.412659	0.620508	7.71266
71214	MZ-241	-23.6414	35.5567	14.08.11	14:19:43	14.08.11 14:19:43	3	-0.41262	0.620581	0.491116
71214	MZ-241	-23.3103	35.5069	15.08.11	08:27:24	15.08.11 08:27:24	3	-0.406841	0.619713	37.1655
71214	MZ-241	-22.8617	35.58	16.08.11	06:18:35	16.08.11 06:18:35	3	-0.399011	0.620988	50.4399
71214	MZ-241	-22.8467	35.5708	16.08.11	07:00:12	16.08.11 07:00:12	3	-0.39875	0.620828	1.91421
71214	MZ-241	-22.8275	35.5581	16.08.11	08:00:56	16.08.11 08:00:56	3	-0.398415	0.620605	2.50136
71214	MZ-241	-22.8208	35.5594	16.08.11	08:09:49	16.08.11 08:09:49	3	-0.398299	0.620629	0.754843
71214	MZ-241	-22.8075	35.545	16.08.11	08:43:24	16.08.11 08:43:24	1	-0.398066	0.620377	2.09522
71214	MZ-241	-22.3853	35.5497	17.08.11	02:45:52	17.08.11 02:45:52	2	-0.390697	0.62046	46.9515
71214	MZ-241	-22.2717	35.5486	17.08.11	07:50:29	17.08.11 07:50:29	3	-0.388714	0.62044	12.6335
71214	MZ-241	-22.2725	35.5508	17.08.11	07:51:00	17.08.11 07:51:00	2	-0.388728	0.620479	0.246726
71214	MZ-241	-22.2594	35.5439	17.08.11	08:20:45	17.08.11 08:20:45	3	-0.388501	0.620358	1.61806
71214	MZ-241	-22.1914	35.9492	18.08.11	16:02:57	18.08.11 16:02:57	3	-0.387313	0.627431	42.3974
71214	MZ-241	-22.46	36.0878	19.08.11	11:48:34	19.08.11 11:48:34	1	-0.392001	0.629851	33.0966
71214	MZ-241	-22.8283	36.3208	20.08.11	08:25:51	20.08.11 08:25:51	2	-0.39843	0.633918	47.4286
71214	MZ-241	-22.8397	36.3503	20.08.11	08:48:11	20.08.11 08:48:11	1	-0.398628	0.634432	3.27246
71214	MZ-241	-22.8678	36.3628	20.08.11	10:08:57	20.08.11 10:08:57	3	-0.399118	0.63465	3.37233
71214	MZ-241	-23.0264	36.5497	21.08.11	06:43:01	21.08.11 06:43:01	3	-0.401886	0.637913	26.0285
71214	MZ-241	-23.0331	36.5528	21.08.11	06:58:37	21.08.11 06:58:37	1	-0.402003	0.637966	0.804548
71214	MZ-241	-23.0436	36.5133	21.08.11	08:08:04	21.08.11 08:08:04	3	-0.402187	0.637278	4.2034
71214	MZ-241	-23.0511	36.5131	21.08.11	08:26:43	21.08.11 08:26:43	3	-0.402318	0.637273	0.834446
71214	MZ-241	-23.0581	36.5064	21.08.11	08:42:56	21.08.11 08:42:56	2	-0.402439	0.637157	1.0303
71214	MZ-241	-23.0817	36.4769	21.08.11	09:43:35	21.08.11 09:43:35	3	-0.402851	0.636643	3.99581
71214	MZ-241	-23.7769	35.9169	22.08.11	12:41:15	22.08.11 12:41:15	2	-0.414986	0.626869	96.1322
71214	MZ-241	-23.7911	35.9083	22.08.11	12:50:20	22.08.11 12:50:20	2	-0.415233	0.626719	1.80254
71214	MZ-241	-24.5261	35.2703	23.08.11	09:06:06	23.08.11 09:06:06	2	-0.428061	0.615582	104.259
71214	MZ-241	-24.5719	35.1936	23.08.11	14:04:34	23.08.11 14:04:34	1	-0.428861	0.614244	9.27919
71214	MZ-241	-24.5875	35.1631	23.08.11	14:27:16	23.08.11 14:27:16	2	-0.429133	0.613711	3.54095
71214	MZ-241	-24.6128	35.1769	24.08.11	06:22:57	24.08.11 06:22:57	3	-0.429574	0.613954	3.142
71214	MZ-241	-24.6525	35.1431	24.08.11	08:41:39	24.08.11 08:41:39	1	-0.430267	0.613362	5.58947
71214	MZ-241	-24.6608	35.1622	24.08.11	08:55:02	24.08.11 08:55:02	2	-0.430413	0.613697	2.14716
71214	MZ-241	-24.6533	35.1492	24.08.11	10:25:26	24.08.11 10:25:26	1	-0.430282	0.613469	1.56082
71214	MZ-241	-24.4817	35.2383	25.08.11	02:29:35	25.08.11 02:29:35	1	-0.427286	0.615025	21.1112
71214	MZ-241	-24.4753	35.2383	25.08.11	03:01:05	25.08.11 03:01:05	2	-0.427174	0.615025	0.710412
71214	MZ-241	-24.4708	35.2339	25.08.11	04:07:41	25.08.11 04:07:41	2	-0.427097	0.614947	0.668246
71214	MZ-241	-24.4544	35.2392	26.08.11	06:28:16	26.08.11 06:28:16	3	-0.426811	0.615039	1.89904
71214	MZ-241	-24.4936	35.215	26.08.11	09:42:08	26.08.11 09:42:08	2	-0.427494	0.614618	4.99489
71214	MZ-241	-24.31	35.3581	28.08.11	13:16:02	28.08.11 13:16:02	1	-0.42429	0.617114	25.0337
71214	MZ-241	-24.5317	35.2189	29.08.11	10:22:11	29.08.11 10:22:11	1	-0.428158	0.614686	28.3913
71214	MZ-241	-24.175	35.4767	30.08.11	13:07:30	30.08.11 13:07:30	3	-0.421933	0.619185	47.4844
71214	MZ-241	-24.1978	35.4558	30.08.11	14:29:09	30.08.11 14:29:09	3	-0.422331	0.618821	3.29857
71214	MZ-241	-24.2047	35.4497	30.08.11	14:54:34	30.08.11 14:54:34	2	-0.422452	0.618714	0.990165
71214	MZ-241	-23.9142	35.5339	31.08.11	12:57:47	31.08.11 12:57:47	3	-0.417381	0.620183	33.4194
71214	MZ-241	-23.8989	35.5425	31.08.11	14:18:13	31.08.11 14:18:13	2	-0.417114	0.620334	1.91108
71214	MZ-241	-23.8986	35.5425	31.08.11	14:42:35	31.08.11 14:42:35	2	-0.417109	0.620334	0.0308875
71214	MZ-241	-23.8925	35.5514	31.08.11	15:48:45	31.08.11 15:48:45	3	-0.417003	0.620489	1.13066
71214	MZ-241	-23.9431	35.5317	01.09.11	08:12:33	01.09.11 08:12:33	3	-0.417885	0.620145	5.96827
71214	MZ-241	-23.9475	35.5231	01.09.11	09:14:49	01.09.11 09:14:49	3	-0.417963	0.619994	1.00501
71214	MZ-241	-23.9158	35.5244	02.09.11	07:01:04	02.09.11 07:01:04	3	-0.41741	0.620019	3.524
71214	MZ-241	-23.9428	35.5361	02.09.11	07:59:10	02.09.11 07:59:10	1	-0.41788	0.620222	3.2222
71214	MZ-241	-23.9425	35.5247	02.09.11	08:45:41	02.09.11 08:45:41	3	-0.417875	0.620023	1.15783
71214	MZ-241	-23.9506	35.5267	02.09.11	08:56:24	02.09.11 08:56:24	3	-0.418016	0.620057	0.917274
71214	MZ-241	-23.8814	35.5431	03.09.11	03:50:32	03.09.11 03:50:32	3	-0.416809	0.620343	7.86933
71214	MZ-241	-23.9108	35.5344	03.09.11	05:33:51	03.09.11 05:33:51	1	-0.417323	0.620193	3.38909
71214	MZ-241	-23.9147	35.5308	03.09.11	06:09:33	03.09.11 06:09:33	3	-0.417391	0.62013	0.567214
71214	MZ-241	-23.9342	35.5183	03.09.11	08:41:59	03.09.11 08:41:59	2	-0.41773	0.619912	2.50779
71230	MZ-463	-23.8978	35.5431	11.08.11	13:12:53	11.08.11 13:12:53	3	-0.417095	0.620343	NaN
71230	MZ-463	-23.8719	35.5586	11.08.11	14:38:26	11.08.11 14:38:26	3	-0.416644	0.620615	3.27915
71230	MZ-463	-23.8636	35.5503	11.08.11	15:29:37	11.08.11 15:29:37	2	-0.416499	0.620469	1.25566
71230	MZ-463	-23.9483	35.5333	14.08.11	18:34:55	14.08.11 18:34:55	2	-0.417977	0.620174	9.57686
71230	MZ-463	-23.9658	35.5292	14.08.11	19:12:05	14.08.11 19:12:05	3	-0.418283	0.620101	1.99144
71230	MZ-463	-23.9739	35.5297	14.08.11	19:40:15	14.08.11 19:40:15	1	-0.418423	0.620111	0.897514
71230	MZ-463	-24.0069	35.5258	14.08.11	21:22:21	14.08.11 21:22:21	1	-0.419	0.620043	3.69678
71230	MZ-463	-24.1789	35.4664	15.08.11	06:30:54	15.08.11 06:30:54	3	-0.422001	0.619005	20.0489
71230	MZ-463	-24.2536	35.42	15.08.11	10:11:28	15.08.11 10:11:28	3	-0.423305	0.618196	9.54806
71230	MZ-463	-24.2933	35.3867	15.08.11	12:30:48	15.08.11 12:30:48	3	-0.423999	0.617614	5.56107
71230	MZ-463	-24.3111	35.3642	15.08.11	13:57:18	15.08.11 13:57:18	3	-0.424309	0.617221	3.01778
71230	MZ-463	-24.3131	35.3603	15.08.11	14:13:23	15.08.11 14:13:23	3	-0.424343	0.617153	0.449493
71230	MZ-463	-26.5025	34.1161	19.08.11	10:28:20	19.08.11 10:28:20	1	-0.462556	0.595438	273.648
71230	MZ-463	-26.5917	34.0847	19.08.11	13:07:00	19.08.11 13:07:00	2	-0.464112	0.594891	10.3949
71230	MZ-463	-26.5992	34.0853	19.08.11	13:28:24	19.08.11 13:28:24	1	-0.464243	0.5949	0.835789
71230	MZ-463	-26.6428	34.0567	19.08.11	14:52:36	19.08.11 14:52:36	3	-0.465004	0.594401	5.62185
71230	MZ-463	-26.6447	34.0472	19.08.11	15:07:24	19.08.11 15:07:24	2	-0.465038	0.594236	0.963238
71230	MZ-463	-26.66	34.0436	19.08.11	15:37:11	19.08.11 15:37:11	3	-0.465305	0.594173	1.7363
71230	MZ-463	-26.7053	33.9714	19.08.11	18:14:43	19.08.11 18:14:43	2	-0.466095	0.592913	8.76562
71230	MZ-463	-26.7072	33.9739	19.08.11	18:16:21	19.08.11 18:16:21	1	-0.466129	0.592956	0.329267
71230	MZ-463	-26.7475	33.9125	19.08.11	19:54:25	19.08.11 19:54:25	2	-0.466832	0.591885	7.56503
71230	MZ-463	-26.7481	33.9122	19.08.11	19:56:53	19.08.11 19:56:53	2	-0.466842	0.59188	0.0676536
71230	MZ-463	-26.7997	33.8608	19.08.11	21:35:55	19.08.11 21:35:55	1	-0.467743	0.590983	7.68322
71230	MZ-463	-26.7997	33.8606	19.08.11	21:34:27	19.08.11 21:34:27	1	-0.467743	0.590978	0.027569
71230	MZ-463	-26.8297	33.8222	19.08.11	22:59:37	19.08.11 22:59:37	3	-0.468267	0.590309	5.05957
71230	MZ-463	-26.8369	33.8242	19.08.11	23:07:07	19.08.11 23:07:07	2	-0.468393	0.590343	0.825924
71230	MZ-463	-26.8625	33.7733	20.08.11	00:31:17	20.08.11 00:31:17	3	-0.468839	0.589456	5.78855
71230	MZ-463	-26.8689	33.755	20.08.11	00:44:39	20.08.11 00:44:39	2	-0.468951	0.589136	1.95238
71230	MZ-463	-26.9175	33.6914	20.08.11	02:50:04	20.08.11 02:50:04	2	-0.469799	0.588026	8.30732
71230	MZ-463	-26.9506	33.6581	20.08.11	04:29:33	20.08.11 04:29:33	3	-0.470376	0.587444	4.94262
71230	MZ-463	-26.9756	33.625	20.08.11	05:33:05	20.08.11 05:33:05	2	-0.470812	0.586867	4.29655
71230	MZ-463	-27.0064	33.4619	20.08.11	13:02:30	20.08.11 13:02:30	2	-0.47135	0.584021	16.5159
71230	MZ-463	-27.0078	33.455	20.08.11	13:11:54	20.08.11 13:11:54	2	-0.471375	0.5839	0.705101
71230	MZ-463	-27.0053	33.4281	20.08.11	14:36:20	20.08.11 14:36:20	3	-0.471331	0.58343	2.68381
71230	MZ-463	-27.0064	33.4161	20.08.11	14:58:54	20.08.11 14:58:54	2	-0.47135	0.583221	1.18977
71230	MZ-463	-27.0119	33.4089	20.08.11	15:12:46	20.08.11 15:12:46	2	-0.471447	0.583095	0.945269
71230	MZ-463	-27.0192	33.3767	20.08.11	16:23:44	20.08.11 16:23:44	1	-0.471573	0.582533	3.29146
71230	MZ-463	-27.0092	33.3572	20.08.11	16:53:42	20.08.11 16:53:42	2	-0.471399	0.582193	2.22413
71230	MZ-463	-27.0186	33.3192	20.08.11	18:31:05	20.08.11 18:31:05	1	-0.471564	0.581529	3.91344
71230	MZ-463	-27.0228	33.3375	20.08.11	19:33:14	20.08.11 19:33:14	3	-0.471636	0.581849	1.87422
71230	MZ-463	-27.0253	33.3403	20.08.11	19:43:43	20.08.11 19:43:43	2	-0.47168	0.581898	0.391133
71230	MZ-463	-27.0422	33.3283	20.08.11	20:59:14	20.08.11 20:59:14	3	-0.471976	0.581689	2.22476
71230	MZ-463	-27.0503	33.3253	20.08.11	21:11:01	20.08.11 21:11:01	2	-0.472116	0.581636	0.945471
71230	MZ-463	-27.0494	33.3169	20.08.11	21:24:03	20.08.11 21:24:03	2	-0.472102	0.58149	0.830449
71230	MZ-463	-27.0606	33.3164	20.08.11	22:39:11	20.08.11 22:39:11	3	-0.472296	0.581481	1.23672
71230	MZ-463	-27.0594	33.3211	20.08.11	22:57:30	20.08.11 22:57:30	1	-0.472276	0.581563	0.483653
71230	MZ-463	-27.0733	33.3039	21.08.11	00:21:24	21.08.11 00:21:24	3	-0.472519	0.581263	2.30067
71230	MZ-463	-27.0706	33.3075	21.08.11	00:34:48	21.08.11 00:34:48	3	-0.47247	0.581326	0.472483
71230	MZ-463	-27.0736	33.2939	21.08.11	01:58:59	21.08.11 01:58:59	2	-0.472524	0.581088	1.38983
71230	MZ-463	-27.0722	33.2953	21.08.11	02:19:03	21.08.11 02:19:03	2	-0.472499	0.581112	0.206788
71230	MZ-463	-27.0786	33.2936	21.08.11	02:26:20	21.08.11 02:26:20	2	-0.472611	0.581083	0.729325
71230	MZ-463	-27.09	33.2817	21.08.11	05:21:08	21.08.11 05:21:08	1	-0.47281	0.580875	1.73265
71230	MZ-463	-27.0956	33.2761	21.08.11	05:47:22	21.08.11 05:47:22	2	-0.472907	0.580778	0.827089
71230	MZ-463	-27.1067	33.2778	21.08.11	06:43:47	21.08.11 06:43:47	2	-0.473101	0.580807	1.24647
71230	MZ-463	-27.1111	33.275	21.08.11	06:58:58	21.08.11 06:58:58	2	-0.473178	0.580758	0.565532
71226	MZ-606	-23.9522	35.5197	26.08.11	12:15:17	26.08.11 12:15:17	2	-0.418045	0.619936	NaN
71226	MZ-606	-23.9428	35.5247	26.08.11	13:54:05	26.08.11 13:54:05	2	-0.41788	0.620023	1.16664
71226	MZ-606	-23.9433	35.5514	26.08.11	18:32:03	26.08.11 18:32:03	2	-0.41789	0.620489	2.71074
71226	MZ-606	-23.8342	35.5372	27.08.11	12:04:29	27.08.11 12:04:29	3	-0.415985	0.620242	12.2239
71226	MZ-606	-23.9583	35.5189	27.08.11	20:08:52	27.08.11 20:08:52	1	-0.418152	0.619922	13.9319
71226	MZ-606	-24.1836	35.4842	28.08.11	18:05:22	28.08.11 18:05:22	1	-0.422084	0.619316	25.2966
71226	MZ-606	-24.2642	35.4053	29.08.11	00:35:12	29.08.11 00:35:12	1	-0.42349	0.617939	12.0095
71226	MZ-606	-24.3514	35.3258	29.08.11	10:24:02	29.08.11 10:24:02	3	-0.425012	0.616552	12.6047
71226	MZ-606	-24.3231	35.3531	29.08.11	13:07:39	29.08.11 13:07:39	2	-0.424517	0.617027	4.18716
71226	MZ-606	-24.2039	35.4408	30.08.11	06:54:37	30.08.11 06:54:37	2	-0.422438	0.618559	15.9612
71226	MZ-606	-24.2028	35.4575	30.08.11	12:53:55	30.08.11 12:53:55	2	-0.422418	0.61885	1.69485
71226	MZ-606	-24.1967	35.4492	30.08.11	13:07:49	30.08.11 13:07:49	3	-0.422312	0.618705	1.08448
71226	MZ-606	-24.1903	35.4597	30.08.11	14:33:46	30.08.11 14:33:46	2	-0.4222	0.618889	1.28489
71226	MZ-606	-24.1817	35.46	30.08.11	14:55:10	30.08.11 14:55:10	2	-0.42205	0.618894	0.957926
71226	MZ-606	-24.3683	35.3178	31.08.11	02:14:20	31.08.11 02:14:20	2	-0.425308	0.616412	25.2716
71226	MZ-606	-24.3828	35.2964	31.08.11	03:23:06	31.08.11 03:23:06	2	-0.42556	0.616038	2.6968
71226	MZ-606	-24.4314	35.2764	31.08.11	05:07:56	31.08.11 05:07:56	1	-0.426408	0.615689	5.77223
71226	MZ-606	-24.4453	35.2558	31.08.11	06:15:06	31.08.11 06:15:06	1	-0.426651	0.61533	2.59137
71226	MZ-606	-24.4731	35.2281	31.08.11	08:05:23	31.08.11 08:05:23	1	-0.427135	0.614846	4.17674
71226	MZ-606	-24.4744	35.2289	31.08.11	08:22:51	31.08.11 08:22:51	2	-0.42716	0.61486	0.175964
71226	MZ-606	-24.4186	35.2739	01.09.11	08:09:30	01.09.11 08:09:30	2	-0.426185	0.615646	7.70023
71226	MZ-606	-24.4081	35.2781	01.09.11	09:14:48	01.09.11 09:14:48	3	-0.426001	0.615718	1.24724
71226	MZ-606	-23.8825	35.5658	03.09.11	08:22:14	03.09.11 08:22:14	3	-0.416828	0.620741	65.328
71226	MZ-606	-23.8839	35.5556	03.09.11	08:38:01	03.09.11 08:38:01	3	-0.416852	0.620562	1.05633
71226	MZ-606	-23.8908	35.5539	03.09.11	10:20:54	03.09.11 10:20:54	1	-0.416974	0.620532	0.79056
71226	MZ-606	-23.8492	35.5578	03.09.11	12:26:12	03.09.11 12:26:12	3	-0.416246	0.6206	4.64997
71226	MZ-606	-23.8192	35.5372	03.09.11	13:54:30	03.09.11 13:54:30	2	-0.415723	0.620242	3.93689
71226	MZ-606	-23.8089	35.5436	03.09.11	14:11:19	03.09.11 14:11:19	3	-0.415544	0.620353	1.31472
71226	MZ-606	-23.7644	35.5306	03.09.11	15:35:25	03.09.11 15:35:25	2	-0.414768	0.620125	5.11742
71226	MZ-606	-23.1986	35.5236	06.09.11	05:31:28	06.09.11 05:31:28	1	-0.404892	0.620004	62.9218
71226	MZ-606	-23.2306	35.5111	06.09.11	07:07:09	06.09.11 07:07:09	3	-0.40545	0.619786	3.77477
71226	MZ-606	-23.2342	35.5119	06.09.11	07:07:09	06.09.11 07:07:09	3	-0.405513	0.6198	0.410466
71226	MZ-606	-23.2708	35.5133	06.09.11	08:50:48	06.09.11 08:50:48	1	-0.406153	0.619825	4.07961
71226	MZ-606	-23.2692	35.5128	06.09.11	08:51:40	06.09.11 08:51:40	2	-0.406124	0.619815	0.193818
71226	MZ-606	-23.2844	35.5164	06.09.11	09:12:05	06.09.11 09:12:05	3	-0.40639	0.619878	1.73839
71226	MZ-606	-23.3483	35.4961	06.09.11	12:01:41	06.09.11 12:01:41	2	-0.407505	0.619524	7.39974
71226	MZ-606	-23.3789	35.4736	06.09.11	13:23:05	06.09.11 13:23:05	2	-0.408039	0.619131	4.10108
71226	MZ-606	-23.3894	35.4744	06.09.11	13:35:07	06.09.11 13:35:07	1	-0.408223	0.619146	1.1768
71226	MZ-606	-23.4281	35.4628	06.09.11	15:01:30	06.09.11 15:01:30	2	-0.408897	0.618942	4.45536
71226	MZ-606	-23.4275	35.4681	06.09.11	15:02:54	06.09.11 15:02:54	1	-0.408887	0.619034	0.542014
71226	MZ-606	-23.5406	35.4514	06.09.11	19:32:52	06.09.11 19:32:52	3	-0.41086	0.618743	12.6856
71226	MZ-606	-23.6708	35.4903	07.09.11	02:24:43	07.09.11 02:24:43	1	-0.413134	0.619422	15.0184
71226	MZ-606	-23.7083	35.4889	07.09.11	03:52:00	07.09.11 03:52:00	1	-0.413788	0.619398	4.17221
71226	MZ-606	-23.7411	35.5083	07.09.11	05:20:30	07.09.11 05:20:30	1	-0.414361	0.619737	4.14753
71226	MZ-606	-23.7414	35.5031	07.09.11	05:32:39	07.09.11 05:32:39	1	-0.414365	0.619645	0.538084
71226	MZ-606	-23.7603	35.4783	07.09.11	07:04:10	07.09.11 07:04:10	2	-0.414695	0.619214	3.27758
71226	MZ-606	-23.7808	35.5108	07.09.11	08:55:36	07.09.11 08:55:36	2	-0.415054	0.619781	4.02023
71226	MZ-606	-23.8042	35.5372	07.09.11	10:37:49	07.09.11 10:37:49	1	-0.415461	0.620242	3.7337
71226	MZ-606	-23.8111	35.5556	07.09.11	11:51:19	07.09.11 11:51:19	2	-0.415582	0.620562	2.01863
71226	MZ-606	-24.1169	35.5031	08.09.11	03:29:01	08.09.11 03:29:01	1	-0.42092	0.619645	34.423
71226	MZ-606	-24.2522	35.4328	08.09.11	11:39:42	08.09.11 11:39:42	1	-0.423281	0.618419	16.6459
71226	MZ-606	-24.3181	35.3664	09.09.11	04:50:19	09.09.11 04:50:19	3	-0.42443	0.61726	9.94308
71226	MZ-606	-24.3006	35.3717	09.09.11	07:37:58	09.09.11 07:37:58	2	-0.424125	0.617352	2.01807
71226	MZ-606	-24.3011	35.3769	09.09.11	09:55:09	09.09.11 09:55:09	3	-0.424134	0.617444	0.538419
71226	MZ-606	-24.3817	35.3406	10.09.11	03:28:50	10.09.11 03:28:50	1	-0.42554	0.616809	9.68634
71226	MZ-606	-24.3733	35.3142	10.09.11	04:25:01	10.09.11 04:25:01	3	-0.425395	0.616348	2.82878
71226	MZ-606	-24.3439	35.3414	10.09.11	09:28:34	10.09.11 09:28:34	3	-0.424881	0.616824	4.28059
71226	MZ-606	-24.3981	35.2953	11.09.11	03:17:55	11.09.11 03:17:55	1	-0.425826	0.616019	7.6217
71226	MZ-606	-24.4089	35.3217	11.09.11	03:58:42	11.09.11 03:58:42	1	-0.426015	0.616479	2.93113
71226	MZ-606	-24.3956	35.2989	11.09.11	09:11:02	11.09.11 09:11:02	3	-0.425783	0.616082	2.74192
71226	MZ-606	-24.5489	35.1956	12.09.11	07:43:47	12.09.11 07:43:47	1	-0.428459	0.614278	20.0017
71226	MZ-606	-24.5483	35.1925	12.09.11	07:43:47	12.09.11 07:43:47	2	-0.428449	0.614225	0.315165
71226	MZ-606	-24.5522	35.1844	12.09.11	08:12:44	12.09.11 08:12:44	2	-0.428517	0.614084	0.922402
71226	MZ-606	-24.5708	35.1911	12.09.11	08:53:09	12.09.11 08:53:09	1	-0.428842	0.614201	2.17652
71226	MZ-606	-24.4481	35.2561	12.09.11	18:28:49	12.09.11 18:28:49	2	-0.426699	0.615335	15.1537
71226	MZ-606	-24.4389	35.2492	12.09.11	18:52:01	12.09.11 18:52:01	2	-0.426539	0.615214	1.23819
71226	MZ-606	-24.2025	35.4525	13.09.11	18:18:34	13.09.11 18:18:34	2	-0.422413	0.618763	33.3976
71226	MZ-606	-24.2608	35.4117	13.09.11	21:02:33	13.09.11 21:02:33	2	-0.423431	0.61805	7.6952
71226	MZ-606	-24.3369	35.3436	14.09.11	01:01:55	14.09.11 01:01:55	3	-0.42476	0.616862	10.9176
71226	MZ-606	-24.3936	35.2883	14.09.11	07:13:24	14.09.11 07:13:24	2	-0.425749	0.615898	8.42934
71226	MZ-606	-24.3744	35.3106	14.09.11	09:53:22	14.09.11 09:53:22	3	-0.425414	0.616285	3.09956
71226	MZ-606	-23.9189	35.5469	15.09.11	20:20:17	15.09.11 20:20:17	1	-0.417463	0.620411	56.047
71226	MZ-606	-23.9436	35.5244	15.09.11	21:14:27	15.09.11 21:14:27	1	-0.417895	0.620019	3.57581
71226	MZ-606	-23.9536	35.5169	15.09.11	22:00:51	15.09.11 22:00:51	3	-0.418069	0.619888	1.34808
71226	MZ-606	-23.9756	35.5072	15.09.11	23:23:46	15.09.11 23:23:46	2	-0.418452	0.619718	2.6325
71226	MZ-606	-24.0044	35.5028	16.09.11	00:39:43	16.09.11 00:39:43	2	-0.418957	0.61964	3.24387
71226	MZ-606	-24.0469	35.505	16.09.11	02:21:32	16.09.11 02:21:32	2	-0.419698	0.619679	4.73117
71226	MZ-606	-23.9292	35.5336	19.09.11	09:43:36	19.09.11 09:43:36	2	-0.417643	0.620179	13.415
71226	MZ-606	-23.9475	35.5153	19.09.11	14:14:51	19.09.11 14:14:51	1	-0.417963	0.619859	2.76177
71226	MZ-606	-23.9514	35.5219	19.09.11	14:45:27	19.09.11 14:45:27	3	-0.418031	0.619975	0.803719
71226	MZ-606	-23.9542	35.5256	19.09.11	14:49:07	19.09.11 14:49:07	2	-0.418079	0.620038	0.479648
71226	MZ-606	-23.9586	35.5222	19.09.11	16:01:25	19.09.11 16:01:25	2	-0.418157	0.61998	0.599137
71226	MZ-606	-23.9597	35.5131	19.09.11	16:30:19	19.09.11 16:30:19	1	-0.418176	0.61982	0.939618
71226	MZ-606	-23.9586	35.5111	20.09.11	00:23:51	20.09.11 00:23:51	3	-0.418157	0.619786	0.233031
71226	MZ-606	-23.9581	35.51	20.09.11	01:38:10	20.09.11 01:38:10	3	-0.418147	0.619766	0.1287
71226	MZ-606	-23.9611	35.5128	20.09.11	03:40:15	20.09.11 03:40:15	3	-0.4182	0.619815	0.441711
71226	MZ-606	-23.9625	35.5111	20.09.11	06:08:08	20.09.11 06:08:08	3	-0.418225	0.619786	0.229197
71226	MZ-606	-23.9614	35.5117	20.09.11	06:40:44	20.09.11 06:40:44	3	-0.418205	0.619796	0.135836
71226	MZ-606	-23.9611	35.5117	20.09.11	07:42:55	20.09.11 07:42:55	3	-0.4182	0.619796	0.0308877
71226	MZ-606	-23.9617	35.5097	20.09.11	12:49:17	20.09.11 12:49:17	3	-0.41821	0.619762	0.207012
71226	MZ-606	-23.9622	35.5072	20.09.11	14:03:36	20.09.11 14:03:36	1	-0.41822	0.619718	0.261432
71226	MZ-606	-23.9603	35.5108	20.09.11	16:03:25	20.09.11 16:03:25	3	-0.418186	0.619781	0.425896
71226	MZ-606	-23.9606	35.5122	20.09.11	18:33:34	20.09.11 18:33:34	2	-0.418191	0.619805	0.14447
71226	MZ-606	-23.9614	35.51	20.09.11	19:02:23	20.09.11 19:02:23	3	-0.418205	0.619766	0.244078
71226	MZ-606	-23.9631	35.5092	20.09.11	20:15:11	20.09.11 20:15:11	2	-0.418234	0.619752	0.203753
71226	MZ-606	-23.9611	35.5128	20.09.11	21:51:30	20.09.11 21:51:30	2	-0.4182	0.619815	0.425894
71219	MZ-607	-23.96	35.5147	11.08.11	17:09:15	11.08.11 17:09:15	3	-0.418181	0.619849	NaN
71219	MZ-607	-23.9506	35.5314	14.08.11	07:12:46	14.08.11 07:12:46	2	-0.418016	0.62014	1.99279
71219	MZ-607	-24.2128	35.4522	18.08.11	13:40:12	18.08.11 13:40:12	2	-0.422593	0.618758	30.2451
71219	MZ-607	-24.1986	35.4603	18.08.11	15:18:38	18.08.11 15:18:38	1	-0.422345	0.618899	1.77452
71219	MZ-607	-24.2086	35.4442	20.08.11	20:58:41	20.08.11 20:58:41	3	-0.42252	0.618617	1.97645
71219	MZ-607	-24.2333	35.4303	20.08.11	22:29:43	20.08.11 22:29:43	2	-0.422951	0.618375	3.08878
71219	MZ-607	-24.3447	35.3386	22.08.11	23:59:26	22.08.11 23:59:26	1	-0.424896	0.616775	15.4831
71219	MZ-607	-24.3442	35.335	23.08.11	00:14:16	23.08.11 00:14:16	3	-0.424886	0.616712	0.371013
71219	MZ-607	-24.3497	35.345	23.08.11	02:00:21	23.08.11 02:00:21	2	-0.424983	0.616887	1.18655
71219	MZ-607	-23.9589	35.5122	24.08.11	20:36:03	24.08.11 20:36:03	1	-0.418161	0.619805	46.6531
71219	MZ-607	-24.3425	35.3456	07.09.11	03:55:08	07.09.11 03:55:08	1	-0.424857	0.616896	45.8853
71219	MZ-607	-23.8908	35.5422	05.10.11	02:19:36	05.10.11 02:19:36	3	-0.416974	0.620329	54.0438
71219	MZ-607	-23.8867	35.5403	05.10.11	06:29:37	05.10.11 06:29:37	2	-0.416901	0.620295	0.503725
71219	MZ-607	-23.8883	35.5422	05.10.11	07:29:17	05.10.11 07:29:17	3	-0.41693	0.620329	0.270974
71219	MZ-607	-23.8972	35.5447	05.10.11	07:38:32	05.10.11 07:38:32	2	-0.417085	0.620372	1.02056
71229	MZ-600	-23.9314	35.5336	23.07.11	12:59:26	23.07.11 12:59:26	2	-0.417682	0.620179	NaN
71229	MZ-600	-23.9336	35.5364	23.07.11	13:09:27	23.07.11 13:09:27	2	-0.41772	0.620227	0.375183
71229	MZ-600	-23.9597	35.515	23.07.11	14:44:02	23.07.11 14:44:02	3	-0.418176	0.619854	3.62691
71229	MZ-600	-23.9647	35.5142	23.07.11	18:35:02	23.07.11 18:35:02	2	-0.418263	0.619839	0.562386
71229	MZ-600	-23.9731	35.5128	23.07.11	18:47:11	23.07.11 18:47:11	1	-0.418409	0.619815	0.937309
71229	MZ-600	-23.8933	35.555	24.07.11	09:25:20	24.07.11 09:25:20	3	-0.417017	0.620552	9.84874
71229	MZ-600	-23.9603	35.5403	24.07.11	12:53:00	24.07.11 12:53:00	3	-0.418186	0.620295	7.59279
71229	MZ-600	-23.9686	35.5344	24.07.11	12:56:32	24.07.11 12:56:32	1	-0.418331	0.620193	1.09998
71229	MZ-600	-23.9944	35.5058	24.07.11	14:31:12	24.07.11 14:31:12	2	-0.418782	0.619694	4.08666
71229	MZ-600	-23.9997	35.5061	24.07.11	14:41:02	24.07.11 14:41:02	3	-0.418874	0.619699	0.58754
71229	MZ-600	-23.9583	35.5181	24.07.11	18:22:55	24.07.11 18:22:55	1	-0.418152	0.619907	4.75954
71229	MZ-600	-23.8906	35.5436	25.07.11	03:17:02	25.07.11 03:17:02	2	-0.416969	0.620353	7.9716
71229	MZ-600	-23.9439	35.5192	25.07.11	05:45:46	25.07.11 05:45:46	2	-0.4179	0.619926	6.42988
71229	MZ-600	-23.9947	35.5014	25.07.11	09:05:00	25.07.11 09:05:00	3	-0.418787	0.619616	5.93402
71229	MZ-600	-24.2478	35.4331	26.07.11	12:37:30	26.07.11 12:37:30	2	-0.423204	0.618423	28.9805
71229	MZ-600	-24.2606	35.4081	26.07.11	14:10:22	26.07.11 14:10:22	1	-0.423427	0.617987	2.90559
71229	MZ-600	-24.2617	35.4211	26.07.11	14:20:33	26.07.11 14:20:33	2	-0.423446	0.618215	1.32925
71229	MZ-600	-24.2675	35.4289	26.07.11	15:15:11	26.07.11 15:15:11	2	-0.423548	0.618351	1.02097
71229	MZ-600	-24.2703	35.4264	26.07.11	16:56:39	26.07.11 16:56:39	1	-0.423596	0.618307	0.399532
71229	MZ-600	-24.2917	35.4325	26.07.11	21:00:29	26.07.11 21:00:29	2	-0.42397	0.618414	2.45767
71229	MZ-600	-24.2928	35.4278	26.07.11	21:10:56	26.07.11 21:10:56	2	-0.423989	0.618331	0.494285
71229	MZ-600	-24.1819	35.4897	27.07.11	08:24:55	27.07.11 08:24:55	3	-0.422055	0.619413	13.8323
71229	MZ-600	-24.175	35.4917	27.07.11	08:38:25	27.07.11 08:38:25	2	-0.421933	0.619446	0.79698
71229	MZ-600	-24.1678	35.4928	27.07.11	14:51:51	27.07.11 14:51:51	1	-0.421807	0.619466	0.810946
71229	MZ-600	-24.1097	35.5094	28.07.11	07:47:01	28.07.11 07:47:01	3	-0.420794	0.619757	6.67334
71229	MZ-600	-24.1069	35.5097	28.07.11	07:58:58	28.07.11 07:58:58	1	-0.420746	0.619762	0.310159
71229	MZ-600	-24.0694	35.5089	28.07.11	20:14:39	28.07.11 20:14:39	1	-0.420091	0.619747	4.17067
71229	MZ-600	-24.0689	35.5128	28.07.11	20:34:52	28.07.11 20:34:52	2	-0.420081	0.619815	0.39963
71229	MZ-600	-23.9497	35.5439	29.07.11	12:06:46	29.07.11 12:06:46	2	-0.418002	0.620358	13.6223
71229	MZ-600	-24.0925	35.5047	29.07.11	21:29:58	29.07.11 21:29:58	2	-0.420493	0.619674	16.3669
71229	MZ-600	-24.0953	35.5017	29.07.11	21:53:00	29.07.11 21:53:00	2	-0.420542	0.619621	0.437725
71229	MZ-600	-24.1392	35.51	30.07.11	04:33:51	30.07.11 04:33:51	1	-0.421308	0.619766	4.95296
71229	MZ-600	-24.1069	35.5258	30.07.11	06:27:00	30.07.11 06:27:00	2	-0.420746	0.620043	3.92676
71229	MZ-600	-24.0903	35.5292	30.07.11	07:24:09	30.07.11 07:24:09	2	-0.420455	0.620101	1.88388
71229	MZ-600	-24.0878	35.5125	30.07.11	08:02:26	30.07.11 08:02:26	3	-0.420411	0.61981	1.71454
71229	MZ-600	-24.0783	35.4953	30.07.11	08:43:34	30.07.11 08:43:34	2	-0.420246	0.619509	2.03949
71229	MZ-600	-24.0544	35.4975	30.07.11	15:07:51	30.07.11 15:07:51	3	-0.419829	0.619548	2.66589
71229	MZ-600	-23.9431	35.5444	31.07.11	06:15:07	31.07.11 06:15:07	2	-0.417885	0.620368	13.2722
71229	MZ-600	-23.935	35.5392	31.07.11	06:36:24	31.07.11 06:36:24	1	-0.417745	0.620275	1.04405
71229	MZ-600	-24.1056	35.5067	01.08.11	05:55:53	01.08.11 05:55:53	2	-0.420721	0.619708	19.25
71229	MZ-600	-24.1039	35.5058	01.08.11	06:12:02	01.08.11 06:12:02	3	-0.420692	0.619694	0.203715
71229	MZ-600	-24.1008	35.5028	01.08.11	07:58:04	01.08.11 07:58:04	2	-0.420639	0.61964	0.460028
71229	MZ-600	-24.1678	35.4814	03.08.11	12:47:02	03.08.11 12:47:02	2	-0.421807	0.619267	7.75385
71229	MZ-600	-24.1778	35.4875	03.08.11	12:53:50	03.08.11 12:53:50	2	-0.421982	0.619374	1.27309
71229	MZ-600	-24.1525	35.4861	03.08.11	14:25:53	03.08.11 14:25:53	3	-0.421541	0.619349	2.81429
71229	MZ-600	-24.1544	35.4842	03.08.11	14:37:56	03.08.11 14:37:56	2	-0.421575	0.619316	0.292691
71229	MZ-600	-23.9214	35.5389	04.08.11	08:44:14	04.08.11 08:44:14	2	-0.417507	0.620271	26.5037
71229	MZ-600	-23.9439	35.5553	04.08.11	12:32:06	04.08.11 12:32:06	2	-0.4179	0.620557	3.00565
71229	MZ-600	-23.9472	35.5472	04.08.11	12:42:49	04.08.11 12:42:49	3	-0.417958	0.620416	0.898642
71229	MZ-600	-23.9653	35.5222	04.08.11	14:26:15	04.08.11 14:26:15	3	-0.418273	0.61998	3.23797
71229	MZ-600	-23.9622	35.5286	04.08.11	14:59:39	04.08.11 14:59:39	2	-0.41822	0.620091	0.732713
71229	MZ-600	-23.9475	35.5233	04.08.11	16:39:05	04.08.11 16:39:05	2	-0.417963	0.619999	1.72265
71229	MZ-600	-23.9053	35.5336	04.08.11	21:14:47	04.08.11 21:14:47	1	-0.417226	0.620179	4.80971
71229	MZ-600	-23.8803	35.5508	04.08.11	23:53:21	04.08.11 23:53:21	1	-0.416789	0.620479	3.28533
71229	MZ-600	-23.9197	35.545	05.08.11	06:17:55	05.08.11 06:17:55	1	-0.417478	0.620377	4.42593
71229	MZ-600	-23.9186	35.5383	05.08.11	06:48:26	05.08.11 06:48:26	3	-0.417459	0.620261	0.688807
71229	MZ-600	-23.9317	35.5408	05.08.11	08:05:01	05.08.11 08:05:01	3	-0.417686	0.620305	1.47378
71229	MZ-600	-23.9344	35.5381	05.08.11	08:31:53	05.08.11 08:31:53	3	-0.417735	0.620256	0.418457
71229	MZ-600	-23.9347	35.535	05.08.11	08:38:32	05.08.11 08:38:32	3	-0.41774	0.620203	0.312079
71229	MZ-600	-23.9528	35.54	05.08.11	12:35:20	05.08.11 12:35:20	3	-0.418055	0.62029	2.07099
71229	MZ-600	-23.9986	35.4936	06.08.11	05:08:55	06.08.11 05:08:55	1	-0.418855	0.61948	6.94171
71229	MZ-600	-23.9969	35.5119	06.08.11	06:44:02	06.08.11 06:44:02	2	-0.418826	0.6198	1.87156
71229	MZ-600	-23.995	35.5236	06.08.11	07:37:31	06.08.11 07:37:31	2	-0.418792	0.620004	1.20472
71229	MZ-600	-24.0097	35.5153	06.08.11	08:19:15	06.08.11 08:19:15	2	-0.419049	0.619859	1.84294
71229	MZ-600	-24.0083	35.5097	06.08.11	08:13:48	06.08.11 08:13:48	3	-0.419024	0.619762	0.585055
71229	MZ-600	-23.9531	35.5139	06.08.11	13:53:40	06.08.11 13:53:40	3	-0.41806	0.619834	6.16117
71229	MZ-600	-24.1669	35.4786	07.08.11	15:23:56	07.08.11 15:23:56	2	-0.421793	0.619219	24.0516
71229	MZ-600	-24.1664	35.4736	07.08.11	15:28:42	07.08.11 15:28:42	2	-0.421783	0.619131	0.510996
71229	MZ-600	-24.2497	35.4394	07.08.11	23:27:58	07.08.11 23:27:58	2	-0.423237	0.618535	9.89293
71229	MZ-600	-24.2358	35.4356	08.08.11	02:46:39	08.08.11 02:46:39	2	-0.422995	0.618467	1.59391
71229	MZ-600	-24.2856	35.4381	08.08.11	06:48:54	08.08.11 06:48:54	3	-0.423863	0.618511	5.53467
71229	MZ-600	-24.2744	35.4428	08.08.11	07:37:14	08.08.11 07:37:14	1	-0.423669	0.618593	1.32497
71229	MZ-600	-24.2719	35.4394	08.08.11	07:58:49	08.08.11 07:58:49	1	-0.423625	0.618535	0.437541
71229	MZ-600	-24.2483	35.4556	08.08.11	09:13:00	08.08.11 09:13:00	1	-0.423213	0.618816	3.092
71229	MZ-600	-24.5808	35.2192	10.08.11	13:23:06	10.08.11 13:23:06	2	-0.429016	0.61469	44.0434
71229	MZ-600	-24.5547	35.2008	10.08.11	14:50:16	10.08.11 14:50:16	3	-0.428561	0.61437	3.44489
71229	MZ-600	-24.5542	35.1956	10.08.11	15:04:52	10.08.11 15:04:52	2	-0.428551	0.614278	0.537352
71229	MZ-600	-24.5478	35.1819	10.08.11	18:20:32	10.08.11 18:20:32	2	-0.42844	0.614041	1.54915
71229	MZ-600	-24.5281	35.2022	10.08.11	19:59:00	10.08.11 19:59:00	2	-0.428095	0.614395	3.00275
71229	MZ-600	-24.52	35.2125	10.08.11	21:07:23	10.08.11 21:07:23	2	-0.427955	0.614574	1.37237
71229	MZ-600	-24.5078	35.2222	10.08.11	21:47:05	10.08.11 21:47:05	1	-0.427741	0.614744	1.67765
71229	MZ-600	-24.4608	35.2378	11.08.11	00:26:31	11.08.11 00:26:31	2	-0.426922	0.615015	5.45217
71229	MZ-600	-24.4558	35.2389	11.08.11	00:38:54	11.08.11 00:38:54	3	-0.426835	0.615035	0.567235
71229	MZ-600	-24.42	35.2789	11.08.11	03:08:27	11.08.11 03:08:27	1	-0.426209	0.615733	5.68094
71229	MZ-600	-24.3419	35.3428	11.08.11	08:11:48	11.08.11 08:11:48	3	-0.424847	0.616848	10.8259
71229	MZ-600	-24.33	35.345	11.08.11	09:00:45	11.08.11 09:00:45	2	-0.424639	0.616887	1.34711
71229	MZ-600	-24.2736	35.4003	11.08.11	12:59:17	11.08.11 12:59:17	3	-0.423654	0.617851	8.40814
71229	MZ-600	-24.0594	35.5047	12.08.11	02:09:46	12.08.11 02:09:46	2	-0.419917	0.619674	26.0651
71229	MZ-600	-24.0622	35.4953	12.08.11	02:44:19	12.08.11 02:44:19	2	-0.419965	0.619509	1.00745
71229	MZ-600	-24.0344	35.5119	12.08.11	04:18:08	12.08.11 04:18:08	2	-0.41948	0.6198	3.52201
71229	MZ-600	-23.9889	35.505	12.08.11	07:57:43	12.08.11 07:57:43	1	-0.418685	0.619679	5.11442
71229	MZ-600	-23.9689	35.5186	12.08.11	09:28:23	12.08.11 09:28:23	3	-0.418336	0.619917	2.61879
71229	MZ-600	-23.9217	35.5339	12.08.11	13:01:12	12.08.11 13:01:12	3	-0.417512	0.620183	5.4756
71229	MZ-600	-23.3028	35.5017	14.08.11	14:24:03	14.08.11 14:24:03	2	-0.40671	0.619621	68.8956
71229	MZ-600	-22.9708	35.5983	15.08.11	10:11:13	15.08.11 10:11:13	2	-0.400917	0.621308	38.2111
71229	MZ-600	-22.8017	35.5403	15.08.11	23:48:38	15.08.11 23:48:38	1	-0.397964	0.620295	19.7283
71229	MZ-600	-22.7789	35.5414	16.08.11	01:12:27	16.08.11 01:12:27	3	-0.397567	0.620314	2.53533
71229	MZ-600	-22.7514	35.5225	16.08.11	02:58:55	16.08.11 02:58:55	2	-0.397087	0.619985	3.61959
71229	MZ-600	-22.7228	35.5217	16.08.11	04:22:28	16.08.11 04:22:28	2	-0.396587	0.61997	3.18256
71229	MZ-600	-22.6933	35.5175	16.08.11	06:20:11	16.08.11 06:20:11	2	-0.396073	0.619897	3.30185
71229	MZ-600	-22.6808	35.5217	16.08.11	06:58:39	16.08.11 06:58:39	3	-0.395855	0.61997	1.45418
71229	MZ-600	-22.6633	35.5164	16.08.11	08:02:56	16.08.11 08:02:56	2	-0.39555	0.619878	2.01985
71229	MZ-600	-22.6619	35.5214	16.08.11	08:08:19	16.08.11 08:08:19	2	-0.395526	0.619965	0.535788
71229	MZ-600	-22.6519	35.5183	16.08.11	08:43:49	16.08.11 08:43:49	1	-0.395351	0.619912	1.15531
71229	MZ-600	-22.625	35.5122	16.08.11	09:51:17	16.08.11 09:51:17	3	-0.394881	0.619805	3.06102
71229	MZ-600	-22.5586	35.515	16.08.11	12:19:07	16.08.11 12:19:07	2	-0.393722	0.619854	7.38761
71229	MZ-600	-22.5286	35.535	16.08.11	13:46:33	16.08.11 13:46:33	3	-0.393198	0.620203	3.91748
71229	MZ-600	-22.5231	35.5383	16.08.11	14:00:12	16.08.11 14:00:12	2	-0.393101	0.620261	0.70628
71229	MZ-600	-22.4956	35.5414	16.08.11	15:09:57	16.08.11 15:09:57	2	-0.392622	0.620314	3.07393
71229	MZ-600	-22.4844	35.5472	16.08.11	15:27:09	16.08.11 15:27:09	3	-0.392428	0.620416	1.37318
71229	MZ-600	-22.4369	35.5531	16.08.11	16:49:05	16.08.11 16:49:05	2	-0.391599	0.620518	5.31567
71229	MZ-600	-22.3856	35.5506	16.08.11	18:46:46	16.08.11 18:46:46	3	-0.390702	0.620474	5.71996
71229	MZ-600	-22.3253	35.5544	16.08.11	21:04:52	16.08.11 21:04:52	1	-0.38965	0.620542	6.7145
71229	MZ-600	-22.1997	35.5553	17.08.11	02:21:53	17.08.11 02:21:53	1	-0.387458	0.620557	13.9614
71229	MZ-600	-22.1958	35.5394	17.08.11	02:46:06	17.08.11 02:46:06	2	-0.38739	0.62028	1.68648
71229	MZ-600	-22.1256	35.5514	17.08.11	06:06:21	17.08.11 06:06:21	3	-0.386164	0.620489	7.91075
71229	MZ-600	-22.1056	35.5569	17.08.11	07:51:22	17.08.11 07:51:22	2	-0.385815	0.620586	2.29636
71229	MZ-600	-22.1044	35.545	17.08.11	07:51:51	17.08.11 07:51:51	3	-0.385795	0.620377	1.23672
71229	MZ-600	-22.0981	35.5406	17.08.11	08:20:01	17.08.11 08:20:01	3	-0.385684	0.6203	0.845188
71229	MZ-600	-22.075	35.5392	17.08.11	09:26:16	17.08.11 09:26:16	3	-0.385281	0.620275	2.56765
71229	MZ-600	-22.4575	35.5764	19.08.11	13:16:01	19.08.11 13:16:01	3	-0.391957	0.620925	42.7042
71229	MZ-600	-22.9719	35.6006	20.08.11	14:45:32	20.08.11 14:45:32	3	-0.400936	0.621347	57.2573
71229	MZ-600	-22.98	35.595	20.08.11	14:58:28	20.08.11 14:58:28	2	-0.401077	0.62125	1.06104
71229	MZ-600	-22.9908	35.6022	20.08.11	15:13:45	20.08.11 15:13:45	2	-0.401266	0.621376	1.41339
71229	MZ-600	-23.0481	35.5736	20.08.11	16:51:14	20.08.11 16:51:14	3	-0.402264	0.620877	7.00422
71229	MZ-600	-23.2425	35.5183	21.08.11	00:21:18	21.08.11 00:21:18	1	-0.405658	0.619912	22.3477
71229	MZ-600	-23.2836	35.5244	21.08.11	02:18:14	21.08.11 02:18:14	2	-0.406376	0.620019	4.61378
71229	MZ-600	-23.3414	35.4883	21.08.11	05:20:34	21.08.11 05:20:34	2	-0.407384	0.619388	7.40767
71229	MZ-600	-23.3636	35.485	21.08.11	06:43:41	21.08.11 06:43:41	3	-0.407772	0.61933	2.49432
71229	MZ-600	-23.3686	35.4839	21.08.11	06:57:21	21.08.11 06:57:21	2	-0.407859	0.619311	0.567425
71229	MZ-600	-23.4922	35.4869	21.08.11	12:52:09	21.08.11 12:52:09	3	-0.410017	0.619364	13.7485
71229	MZ-600	-23.5003	35.4822	21.08.11	13:01:14	21.08.11 13:01:14	3	-0.410157	0.619282	1.01697
71229	MZ-600	-23.5336	35.4731	21.08.11	14:26:10	21.08.11 14:26:10	2	-0.410739	0.619122	3.82252
71229	MZ-600	-23.5336	35.4739	21.08.11	14:49:24	21.08.11 14:49:24	2	-0.410739	0.619136	0.0849551
71229	MZ-600	-23.5331	35.4744	21.08.11	14:48:46	21.08.11 14:48:46	2	-0.410729	0.619146	0.0838078
71229	MZ-600	-23.9986	35.5094	22.08.11	12:41:03	22.08.11 12:41:03	2	-0.418855	0.619757	51.8898
71229	MZ-600	-24.0069	35.5083	22.08.11	12:51:11	22.08.11 12:51:11	1	-0.419	0.619737	0.933472
71229	MZ-600	-24.1272	35.4886	22.08.11	17:43:08	22.08.11 17:43:08	3	-0.421099	0.619393	13.5233
71229	MZ-600	-24.2842	35.3772	23.08.11	01:37:37	23.08.11 01:37:37	1	-0.423839	0.617449	20.7888
71229	MZ-600	-24.2936	35.3842	23.08.11	01:57:25	23.08.11 01:57:25	3	-0.424004	0.61757	1.26422
71229	MZ-600	-24.3931	35.2944	23.08.11	07:42:29	23.08.11 07:42:29	2	-0.425739	0.616004	14.3141
71229	MZ-600	-24.4206	35.2767	23.08.11	09:04:12	23.08.11 09:04:12	2	-0.426219	0.615694	3.54838
71229	MZ-600	-24.5075	35.23	23.08.11	12:46:17	23.08.11 12:46:17	3	-0.427737	0.614879	10.7599
71229	MZ-600	-24.6006	35.1772	24.08.11	02:52:45	24.08.11 02:52:45	3	-0.429361	0.613958	11.643
71229	MZ-600	-24.4961	35.2164	24.08.11	12:38:12	24.08.11 12:38:12	2	-0.427538	0.614642	12.2707
71229	MZ-600	-24.5353	35.2008	24.08.11	18:53:41	24.08.11 18:53:41	3	-0.428221	0.61437	4.63076
71229	MZ-600	-24.5206	35.2139	24.08.11	19:33:58	24.08.11 19:33:58	1	-0.427964	0.614598	2.10337
71229	MZ-600	-24.5242	35.2067	24.08.11	19:37:02	24.08.11 19:37:02	3	-0.428027	0.614472	0.833704
71229	MZ-600	-24.4708	35.2317	25.08.11	02:29:19	25.08.11 02:29:19	2	-0.427097	0.614909	6.44737
71229	MZ-600	-24.4742	35.2386	25.08.11	03:01:23	25.08.11 03:01:23	2	-0.427155	0.61503	0.794562
71229	MZ-600	-24.4733	35.2422	25.08.11	04:09:27	25.08.11 04:09:27	2	-0.42714	0.615093	0.377024
71229	MZ-600	-24.4344	35.2875	25.08.11	06:48:24	25.08.11 06:48:24	3	-0.426462	0.615883	6.30105
71229	MZ-600	-24.4819	35.2289	25.08.11	19:16:13	25.08.11 19:16:13	3	-0.427291	0.61486	7.94296
71229	MZ-600	-24.4731	35.2306	28.08.11	08:57:27	28.08.11 08:57:27	1	-0.427135	0.614889	1.00269
71229	MZ-600	-26.9764	32.8892	08.09.11	19:18:05	08.09.11 19:18:05	2	-0.470827	0.574024	363.977
71229	MZ-600	-26.9942	32.8847	08.09.11	22:41:05	08.09.11 22:41:05	3	-0.471137	0.573947	2.02526
71229	MZ-600	-27.0036	32.9039	09.09.11	01:55:36	09.09.11 01:55:36	1	-0.471302	0.574281	2.17001
71229	MZ-600	-32.625	28.58	14.10.11	13:11:30	14.10.11 13:11:30	1	-0.569414	0.498815	751.289
71229	MZ-600	-32.6486	28.5594	14.10.11	13:38:03	14.10.11 13:38:03	2	-0.569826	0.498456	3.25541
71229	MZ-600	-32.6878	28.5553	14.10.11	14:45:53	14.10.11 14:45:53	1	-0.570509	0.498384	4.37256
71229	MZ-600	-32.7203	28.485	14.10.11	15:23:19	14.10.11 15:23:19	2	-0.571077	0.497157	7.50332
71229	MZ-600	-32.7653	28.4436	14.10.11	16:23:46	14.10.11 16:23:46	3	-0.571862	0.496435	6.32631
71229	MZ-600	-32.7708	28.4297	14.10.11	16:34:12	14.10.11 16:34:12	2	-0.571959	0.496192	1.43806
71229	MZ-600	-32.8367	28.3664	14.10.11	18:05:35	14.10.11 18:05:35	3	-0.573108	0.495087	9.41411
71229	MZ-600	-32.8636	28.34	14.10.11	18:47:32	14.10.11 18:47:32	3	-0.573578	0.494626	3.87985
71229	MZ-600	-32.8844	28.3122	14.10.11	19:37:46	14.10.11 19:37:46	3	-0.573942	0.494141	3.47793
71229	MZ-600	-32.8892	28.29	14.10.11	20:14:33	14.10.11 20:14:33	1	-0.574024	0.493754	2.14041
71229	MZ-600	-32.9056	28.2769	14.10.11	20:28:36	14.10.11 20:28:36	1	-0.57431	0.493526	2.19244
71229	MZ-600	-32.9161	28.2708	14.10.11	21:18:56	14.10.11 21:18:56	3	-0.574495	0.493419	1.30502
71229	MZ-600	-32.925	28.2556	14.10.11	22:00:42	14.10.11 22:00:42	1	-0.57465	0.493152	1.73507
71229	MZ-600	-32.9283	28.2394	14.10.11	22:09:58	14.10.11 22:09:58	2	-0.574708	0.492871	1.54871
71229	MZ-600	-32.9508	28.2053	14.10.11	23:24:34	14.10.11 23:24:34	2	-0.575101	0.492275	4.05284
71229	MZ-600	-32.9522	28.1986	14.10.11	23:34:20	14.10.11 23:34:20	1	-0.575125	0.492159	0.640932
71229	MZ-600	-32.9806	28.1686	15.10.11	00:31:27	15.10.11 00:31:27	2	-0.575619	0.491635	4.21411
71229	MZ-600	-32.9864	28.1519	15.10.11	01:02:32	15.10.11 01:02:32	2	-0.575721	0.491344	1.68445
71229	MZ-600	-33.0147	28.1436	15.10.11	02:21:34	15.10.11 02:21:34	1	-0.576216	0.491199	3.24495
71229	MZ-600	-33.0228	28.1172	15.10.11	02:49:13	15.10.11 02:49:13	2	-0.576356	0.490738	2.61838
71229	MZ-600	-33.04	28.0881	15.10.11	03:40:01	15.10.11 03:40:01	3	-0.576657	0.490229	3.3257
71229	MZ-600	-33.0436	28.0867	15.10.11	03:54:28	15.10.11 03:54:28	2	-0.57672	0.490205	0.421891
71229	MZ-600	-33.0767	28.0564	15.10.11	05:21:02	15.10.11 05:21:02	3	-0.577297	0.489676	4.63377
71229	MZ-600	-33.0919	28.0347	15.10.11	06:08:21	15.10.11 06:08:21	3	-0.577563	0.489298	2.63832
71229	MZ-600	-33.1061	28.0225	15.10.11	07:00:54	15.10.11 07:00:54	3	-0.577811	0.489085	1.94362
71229	MZ-600	-33.1197	28.015	15.10.11	07:31:36	15.10.11 07:31:36	2	-0.578048	0.488954	1.66691
71229	MZ-600	-33.1264	28.0197	15.10.11	07:51:27	15.10.11 07:51:27	3	-0.578165	0.489036	0.861925
71229	MZ-600	-33.1403	28.0103	15.10.11	08:35:17	15.10.11 08:35:17	3	-0.578407	0.488872	1.77721
71229	MZ-600	-33.1786	28.0008	15.10.11	10:54:13	15.10.11 10:54:13	2	-0.579076	0.488707	4.35219
71229	MZ-600	-33.2133	27.9786	15.10.11	13:27:28	15.10.11 13:27:28	3	-0.579682	0.488319	4.37977
71229	MZ-600	-33.2167	27.9581	15.10.11	14:34:55	15.10.11 14:34:55	3	-0.57974	0.48796	1.94783
71229	MZ-600	-33.2181	27.9606	15.10.11	15:07:37	15.10.11 15:07:37	3	-0.579764	0.488004	0.279172
71229	MZ-600	-33.2194	27.9494	15.10.11	15:53:24	15.10.11 15:53:24	3	-0.579789	0.48781	1.04507
71229	MZ-600	-33.2197	27.9483	15.10.11	16:15:30	15.10.11 16:15:30	3	-0.579794	0.48779	0.107875
71229	MZ-600	-33.2236	27.9283	15.10.11	17:39:13	15.10.11 17:39:13	3	-0.579861	0.487441	1.91001
71229	MZ-600	-33.2319	27.9181	15.10.11	18:36:21	15.10.11 18:36:21	2	-0.580007	0.487262	1.33136
71229	MZ-600	-33.2333	27.9128	15.10.11	19:14:55	15.10.11 19:14:55	3	-0.580031	0.48717	0.514603
71229	MZ-600	-33.2414	27.895	15.10.11	20:16:57	15.10.11 20:16:57	2	-0.580172	0.48686	1.88045
71229	MZ-600	-33.2439	27.8883	15.10.11	20:55:19	15.10.11 20:55:19	3	-0.580215	0.486743	0.67946
71229	MZ-600	-33.2494	27.8822	15.10.11	21:39:11	15.10.11 21:39:11	3	-0.580312	0.486637	0.839391
71229	MZ-600	-33.2528	27.8761	15.10.11	21:57:38	15.10.11 21:57:38	2	-0.58037	0.48653	0.678463
71229	MZ-600	-33.27	27.8603	15.10.11	23:14:40	15.10.11 23:14:40	2	-0.580671	0.486254	2.41549
71229	MZ-600	-33.2614	27.8694	15.10.11	23:20:18	15.10.11 23:20:18	3	-0.580521	0.486414	1.28187
71229	MZ-600	-33.2761	27.8639	16.10.11	00:21:55	16.10.11 00:21:55	2	-0.580778	0.486317	1.71658
71229	MZ-600	-33.2775	27.8617	16.10.11	00:51:45	16.10.11 00:51:45	3	-0.580802	0.486278	0.257929
71229	MZ-600	-33.2864	27.8478	16.10.11	01:59:51	16.10.11 01:59:51	1	-0.580957	0.486035	1.62597
71229	MZ-600	-33.2917	27.8464	16.10.11	02:36:20	16.10.11 02:36:20	2	-0.581049	0.486011	0.600894
71229	MZ-600	-33.2933	27.8411	16.10.11	03:16:30	16.10.11 03:16:30	3	-0.581078	0.485919	0.524386
71229	MZ-600	-33.3011	27.8208	16.10.11	04:56:28	16.10.11 04:56:28	3	-0.581214	0.485565	2.07359
71229	MZ-600	-33.3019	27.8006	16.10.11	06:02:34	16.10.11 06:02:34	2	-0.581229	0.485211	1.88681
71229	MZ-600	-33.3075	27.7953	16.10.11	06:37:00	16.10.11 06:37:00	3	-0.581326	0.485119	0.788786
71229	MZ-600	-33.3053	27.7872	16.10.11	07:11:40	16.10.11 07:11:40	1	-0.581287	0.484979	0.788336
71229	MZ-600	-33.3158	27.8017	16.10.11	07:34:10	16.10.11 07:34:10	1	-0.581471	0.485231	1.78306
71229	MZ-600	-33.3119	27.7814	16.10.11	08:12:09	16.10.11 08:12:09	3	-0.581403	0.484877	1.93325
71229	MZ-600	-33.3117	27.7717	16.10.11	08:48:28	16.10.11 08:48:28	3	-0.581398	0.484707	0.903965
71229	MZ-600	-33.3106	27.7728	16.10.11	09:21:40	16.10.11 09:21:40	1	-0.581379	0.484726	0.161013
71229	MZ-600	-33.3106	27.7742	16.10.11	10:29:07	16.10.11 10:29:07	2	-0.581379	0.484751	0.129064
71229	MZ-600	-33.3061	27.7669	16.10.11	13:16:52	16.10.11 13:16:52	3	-0.581301	0.484625	0.833474
71229	MZ-600	-33.3064	27.7586	16.10.11	14:23:48	16.10.11 14:23:48	3	-0.581306	0.484479	0.775039
71229	MZ-600	-33.3069	27.7586	16.10.11	14:57:17	16.10.11 14:57:17	3	-0.581316	0.484479	0.0617744
71229	MZ-600	-33.3053	27.7586	16.10.11	15:34:58	16.10.11 15:34:58	2	-0.581287	0.484479	0.185324
71229	MZ-600	-33.3075	27.7528	16.10.11	16:10:04	16.10.11 16:10:04	3	-0.581326	0.484377	0.595757
71229	MZ-600	-33.3097	27.7528	16.10.11	17:15:08	16.10.11 17:15:08	2	-0.581364	0.484377	0.2471
71229	MZ-600	-33.3178	27.7383	16.10.11	18:51:02	16.10.11 18:51:02	2	-0.581505	0.484125	1.61366
71229	MZ-600	-33.3208	27.7406	16.10.11	18:54:01	16.10.11 18:54:01	2	-0.581558	0.484164	0.397584
71229	MZ-600	-33.3272	27.7303	16.10.11	20:06:09	16.10.11 20:06:09	3	-0.58167	0.483985	1.1902
71229	MZ-600	-33.3308	27.7261	16.10.11	20:31:18	16.10.11 20:31:18	2	-0.581733	0.483912	0.557752
71229	MZ-600	-33.335	27.7197	16.10.11	21:16:13	16.10.11 21:16:13	3	-0.581806	0.4838	0.752962
71229	MZ-600	-33.3494	27.7181	16.10.11	22:10:37	16.10.11 22:10:37	2	-0.582058	0.483771	1.61359
71229	MZ-600	-33.3619	27.7172	16.10.11	23:04:36	16.10.11 23:04:36	1	-0.582276	0.483757	1.39209
71229	MZ-600	-33.3617	27.7008	17.10.11	00:11:04	17.10.11 00:11:04	1	-0.582271	0.483471	1.52238
71229	MZ-600	-33.3706	27.6997	17.10.11	00:42:00	17.10.11 00:42:00	3	-0.582426	0.483451	0.993771
71229	MZ-600	-33.3789	27.69	17.10.11	01:48:57	17.10.11 01:48:57	2	-0.582572	0.483282	1.2937
71229	MZ-600	-33.3883	27.6917	17.10.11	02:24:50	17.10.11 02:24:50	2	-0.582736	0.483311	1.06151
71229	MZ-600	-33.3925	27.6792	17.10.11	02:51:41	17.10.11 02:51:41	2	-0.582809	0.483093	1.24958
71229	MZ-600	-33.3972	27.6758	17.10.11	03:32:21	17.10.11 03:32:21	2	-0.582891	0.483034	0.609491
71229	MZ-600	-33.4058	27.665	17.10.11	04:32:03	17.10.11 04:32:03	2	-0.583042	0.482845	1.38858
71229	MZ-600	-33.41	27.6431	17.10.11	05:50:54	17.10.11 05:50:54	2	-0.583115	0.482462	2.08896
71229	MZ-600	-33.4139	27.6361	17.10.11	06:12:25	17.10.11 06:12:25	2	-0.583182	0.482341	0.776185
71229	MZ-600	-33.4078	27.6356	17.10.11	06:11:59	17.10.11 06:11:59	2	-0.583076	0.482331	0.681478
71229	MZ-600	-33.4194	27.6011	17.10.11	07:29:10	17.10.11 07:29:10	2	-0.583279	0.48173	3.45018
71229	MZ-600	-33.4292	27.6214	17.10.11	07:49:38	17.10.11 07:49:38	2	-0.583449	0.482084	2.17029
71229	MZ-600	-33.4344	27.5944	17.10.11	08:27:36	17.10.11 08:27:36	3	-0.583541	0.481614	2.56831
71229	MZ-600	-33.4464	27.5883	17.10.11	09:08:07	17.10.11 09:08:07	2	-0.58375	0.481507	1.44414
71229	MZ-600	-33.4536	27.5861	17.10.11	09:28:44	17.10.11 09:28:44	2	-0.583876	0.481468	0.829117
71229	MZ-600	-33.465	27.5758	17.10.11	10:10:15	17.10.11 10:10:15	3	-0.584074	0.481289	1.58518
71229	MZ-600	-33.5208	27.5047	17.10.11	13:06:47	17.10.11 13:06:47	3	-0.585049	0.480048	9.05693
71229	MZ-600	-33.5392	27.4578	17.10.11	14:13:15	17.10.11 14:13:15	3	-0.585369	0.479229	4.80522
71229	MZ-600	-33.5428	27.4442	17.10.11	14:46:52	17.10.11 14:46:52	3	-0.585432	0.478991	1.32384
71229	MZ-600	-33.5611	27.3981	17.10.11	15:53:49	17.10.11 15:53:49	3	-0.585752	0.478186	4.73441
71229	MZ-600	-33.5764	27.3669	17.10.11	16:50:51	17.10.11 16:50:51	3	-0.586019	0.477643	3.34582
71229	MZ-600	-33.6036	27.2997	17.10.11	18:30:55	17.10.11 18:30:55	3	-0.586494	0.47647	6.92339
71229	MZ-600	-33.6342	27.2542	17.10.11	19:52:59	17.10.11 19:52:59	3	-0.587027	0.475675	5.41643
71229	MZ-600	-33.6386	27.2475	17.10.11	20:10:09	17.10.11 20:10:09	3	-0.587105	0.475559	0.790663
71229	MZ-600	-33.6556	27.2189	17.10.11	20:54:01	17.10.11 20:54:01	2	-0.5874	0.475059	3.25024
71229	MZ-600	-33.6758	27.1931	17.10.11	21:34:24	17.10.11 21:34:24	3	-0.587754	0.474608	3.28631
71229	MZ-600	-33.6831	27.1831	17.10.11	21:50:58	17.10.11 21:50:58	3	-0.58788	0.474434	1.22521
71229	MZ-600	-33.7039	27.16	17.10.11	22:39:06	17.10.11 22:39:06	2	-0.588244	0.474031	3.149
71229	MZ-600	-33.7556	27.1078	18.10.11	00:32:03	18.10.11 00:32:03	3	-0.589146	0.47312	7.50523
71229	MZ-600	-33.7872	27.0828	18.10.11	01:38:09	18.10.11 01:38:09	3	-0.589698	0.472684	4.21171
71229	MZ-600	-33.7997	27.0756	18.10.11	02:14:42	18.10.11 02:14:42	3	-0.589916	0.472558	1.54186
71229	MZ-600	-33.7956	27.0675	18.10.11	02:28:49	18.10.11 02:28:49	1	-0.589844	0.472417	0.876776
71229	MZ-600	-33.8225	27.0403	18.10.11	03:21:52	18.10.11 03:21:52	3	-0.590314	0.471942	3.91181
71229	MZ-600	-33.8422	27.0106	18.10.11	04:07:28	18.10.11 04:07:28	2	-0.590658	0.471423	3.51371
71229	MZ-600	-33.8842	26.9708	18.10.11	05:38:20	18.10.11 05:38:20	1	-0.59139	0.47073	5.93336
71229	MZ-600	-33.885	26.9708	18.10.11	05:47:30	18.10.11 05:47:30	2	-0.591405	0.47073	0.0926621
71229	MZ-600	-33.9178	26.9131	18.10.11	07:13:04	18.10.11 07:13:04	2	-0.591977	0.469721	6.45899
71229	MZ-600	-33.9208	26.9097	18.10.11	07:27:13	18.10.11 07:27:13	3	-0.59203	0.469663	0.458301
71229	MZ-600	-33.9381	26.8806	18.10.11	08:09:13	18.10.11 08:09:13	2	-0.592331	0.469154	3.30281
71229	MZ-600	-33.9519	26.8614	18.10.11	08:54:26	18.10.11 08:54:26	1	-0.592573	0.46882	2.34755
71229	MZ-600	-33.9617	26.8581	18.10.11	09:05:55	18.10.11 09:05:55	2	-0.592743	0.468761	1.12393
71229	MZ-600	-33.9742	26.8375	18.10.11	09:51:04	18.10.11 09:51:04	2	-0.592961	0.468403	2.3506
71229	MZ-600	-34.0572	26.7253	18.10.11	12:56:44	18.10.11 12:56:44	3	-0.594411	0.466444	13.8663
71229	MZ-600	-34.1003	26.6511	18.10.11	14:35:46	18.10.11 14:35:46	2	-0.595162	0.46515	8.34141
71229	MZ-600	-34.1336	26.6042	18.10.11	15:43:14	18.10.11 15:43:14	3	-0.595744	0.46433	5.69336
71229	MZ-600	-34.1544	26.5778	18.10.11	16:27:31	18.10.11 16:27:31	2	-0.596108	0.46387	3.35621
71229	MZ-600	-34.2033	26.5006	18.10.11	18:10:03	18.10.11 18:10:03	2	-0.596961	0.462522	8.94509
71229	MZ-600	-34.2528	26.4447	18.10.11	19:42:52	18.10.11 19:42:52	3	-0.597824	0.461547	7.52175
71229	MZ-600	-34.2564	26.4411	18.10.11	19:44:36	18.10.11 19:44:36	3	-0.597887	0.461484	0.520943
71229	MZ-600	-34.2842	26.415	18.10.11	20:33:07	18.10.11 20:33:07	1	-0.598372	0.461029	3.91118
71229	MZ-600	-34.3069	26.3756	18.10.11	21:23:55	18.10.11 21:23:55	2	-0.598769	0.46034	4.42092
71229	MZ-600	-34.3083	26.3753	18.10.11	21:25:17	18.10.11 21:25:17	3	-0.598793	0.460335	0.156531
71229	MZ-600	-34.3303	26.3389	18.10.11	22:18:05	18.10.11 22:18:05	2	-0.599176	0.4597	4.13788
71229	MZ-600	-34.3744	26.265	18.10.11	23:52:11	18.10.11 23:52:11	1	-0.599947	0.458411	8.37429
71226	MZ-614	-23.8756	35.555	12.10.11	14:04:57	12.10.11 14:04:57	2	-0.416707	0.620552	NaN
71226	MZ-614	-23.8772	35.5547	12.10.11	15:31:57	12.10.11 15:31:57	2	-0.416736	0.620547	0.187464
71226	MZ-614	-23.8756	35.5531	13.10.11	02:45:01	13.10.11 02:45:01	2	-0.416707	0.620518	0.251124
71226	MZ-614	-23.8869	35.5519	13.10.11	04:23:31	13.10.11 04:23:31	3	-0.416906	0.620498	1.27141
71226	MZ-614	-23.8997	35.5369	13.10.11	09:51:18	13.10.11 09:51:18	3	-0.417129	0.620237	2.0843
71226	MZ-614	-23.9014	35.5583	13.10.11	16:52:22	13.10.11 16:52:22	3	-0.417158	0.62061	2.18228
71226	MZ-614	-23.9208	35.5486	14.10.11	04:01:22	14.10.11 04:01:22	1	-0.417497	0.62044	2.37728
71226	MZ-614	-23.9431	35.5361	14.10.11	13:38:38	14.10.11 13:38:38	2	-0.417885	0.620222	2.77846
71226	MZ-614	-23.9386	35.5225	14.10.11	14:44:31	14.10.11 14:44:31	1	-0.417808	0.619985	1.4689
71226	MZ-614	-23.915	35.5431	14.10.11	14:54:48	14.10.11 14:54:48	3	-0.417395	0.620343	3.35528
71226	MZ-614	-23.8819	35.5556	14.10.11	18:51:32	14.10.11 18:51:32	1	-0.416819	0.620562	3.88908
71226	MZ-614	-23.9078	35.5478	14.10.11	20:18:00	14.10.11 20:18:00	2	-0.417269	0.620426	2.97938
71226	MZ-614	-23.8908	35.5508	15.10.11	06:04:53	15.10.11 06:04:53	1	-0.416974	0.620479	1.90957
71226	MZ-614	-23.8844	35.5525	15.10.11	06:52:41	15.10.11 06:52:41	3	-0.416862	0.620508	0.730342
71226	MZ-614	-23.8769	35.5514	15.10.11	07:32:05	15.10.11 07:32:05	2	-0.416731	0.620489	0.841579
71226	MZ-614	-23.8867	35.5639	15.10.11	07:48:14	15.10.11 07:48:14	3	-0.416901	0.620707	1.66852
71226	MZ-614	-23.8758	35.56	15.10.11	09:08:28	15.10.11 09:08:28	3	-0.416712	0.620639	1.26785
71226	MZ-614	-23.9094	35.5386	15.10.11	16:03:10	15.10.11 16:03:10	3	-0.417299	0.620266	4.32396
71226	MZ-614	-23.8753	35.5536	15.10.11	23:12:42	15.10.11 23:12:42	1	-0.416702	0.620528	4.0938
71226	MZ-614	-23.8992	35.5464	16.10.11	04:57:03	16.10.11 04:57:03	2	-0.417119	0.620402	2.75594
71226	MZ-614	-23.9033	35.5375	16.10.11	05:58:02	16.10.11 05:58:02	1	-0.417192	0.620246	1.01549
71226	MZ-614	-23.9197	35.5325	16.10.11	06:28:51	16.10.11 06:28:51	2	-0.417478	0.620159	1.89191
71226	MZ-614	-23.8703	35.5564	16.10.11	11:43:18	16.10.11 11:43:18	1	-0.416615	0.620576	6.01049
71226	MZ-614	-23.8864	35.5483	16.10.11	14:33:00	16.10.11 14:33:00	1	-0.416896	0.620435	1.96984
71226	MZ-614	-23.9186	35.5433	16.10.11	17:15:36	16.10.11 17:15:36	2	-0.417459	0.620348	3.61882
71226	MZ-614	-23.9044	35.5497	17.10.11	02:49:45	17.10.11 02:49:45	2	-0.417211	0.62046	1.70388
71226	MZ-614	-23.8892	35.5483	17.10.11	06:11:32	17.10.11 06:11:32	3	-0.416945	0.620435	1.70467
71226	MZ-614	-23.8764	35.5592	17.10.11	07:30:43	17.10.11 07:30:43	1	-0.416722	0.620625	1.79777
71226	MZ-614	-23.8825	35.5572	17.10.11	07:49:09	17.10.11 07:49:09	3	-0.416828	0.620591	0.707701
71226	MZ-614	-23.8808	35.5514	17.10.11	08:26:33	17.10.11 08:26:33	3	-0.416799	0.620489	0.621383
71226	MZ-614	-23.8822	35.565	17.10.11	10:10:31	17.10.11 10:10:31	1	-0.416823	0.620726	1.3925
71226	MZ-614	-23.8317	35.5422	18.10.11	05:37:11	18.10.11 05:37:11	1	-0.415941	0.620329	6.08005
71226	MZ-614	-23.8308	35.5347	18.10.11	07:17:56	18.10.11 07:17:56	1	-0.415927	0.620198	0.768465
71226	MZ-614	-23.8203	35.5364	18.10.11	08:11:07	18.10.11 08:11:07	1	-0.415742	0.620227	1.1859
71226	MZ-614	-23.8153	35.545	18.10.11	09:42:54	18.10.11 09:42:54	3	-0.415655	0.620377	1.03751
71226	MZ-614	-23.9419	35.5211	19.10.11	12:46:41	19.10.11 12:46:41	2	-0.417866	0.61996	14.2926
71226	MZ-614	-23.985	35.5539	19.10.11	17:42:00	19.10.11 17:42:00	1	-0.418617	0.620532	5.8321
71226	MZ-614	-23.9858	35.5169	19.10.11	21:04:49	19.10.11 21:04:49	1	-0.418632	0.619888	3.75445
71226	MZ-614	-23.9739	35.5144	19.10.11	21:12:45	19.10.11 21:12:45	2	-0.418423	0.619844	1.35223
71226	MZ-614	-23.9258	35.5394	20.10.11	01:50:43	20.10.11 01:50:43	2	-0.417585	0.62028	5.91673
71226	MZ-614	-23.9578	35.5278	20.10.11	03:00:29	20.10.11 03:00:29	2	-0.418142	0.620077	3.74472
71226	MZ-614	-23.9694	35.5119	20.10.11	03:15:56	20.10.11 03:15:56	3	-0.418346	0.6198	2.0667
71226	MZ-614	-24.1031	35.4917	20.10.11	12:38:52	20.10.11 12:38:52	2	-0.420678	0.619446	14.9989
71226	MZ-614	-24.1356	35.4619	20.10.11	13:42:19	20.10.11 13:42:19	1	-0.421245	0.618928	4.7073
71226	MZ-614	-24.1164	35.5025	20.10.11	14:23:11	20.10.11 14:23:11	3	-0.42091	0.619636	4.63474
71226	MZ-614	-24.0589	35.5136	21.10.11	06:34:39	21.10.11 06:34:39	1	-0.419907	0.619829	6.49243
71226	MZ-614	-24.0297	35.5019	21.10.11	07:48:38	21.10.11 07:48:38	1	-0.419398	0.619626	3.4528
71226	MZ-614	-24.0247	35.5047	21.10.11	08:20:06	21.10.11 08:20:06	2	-0.419311	0.619674	0.623454
71226	MZ-614	-23.8358	35.5469	21.10.11	14:12:07	21.10.11 14:12:07	2	-0.416014	0.620411	21.4374
71226	MZ-614	-23.8156	35.5506	21.10.11	16:55:21	21.10.11 16:55:21	3	-0.41566	0.620474	2.28451
71226	MZ-614	-23.9858	35.5142	22.10.11	10:06:49	22.10.11 10:06:49	2	-0.418632	0.619839	19.292
71226	MZ-614	-24.1528	35.4811	22.10.11	23:38:16	22.10.11 23:38:16	3	-0.421545	0.619262	18.8643
71226	MZ-614	-24.2814	35.3969	23.10.11	07:56:11	23.10.11 07:56:11	2	-0.42379	0.617793	16.6543
71226	MZ-614	-24.2997	35.3792	23.10.11	08:47:51	23.10.11 08:47:51	2	-0.42411	0.617483	2.72071
71226	MZ-614	-24.22	35.4428	23.10.11	17:47:38	23.10.11 17:47:38	2	-0.422719	0.618593	10.9621
71226	MZ-614	-24.1392	35.4914	24.10.11	03:20:21	24.10.11 03:20:21	2	-0.421308	0.619442	10.252
71226	MZ-614	-24.1483	35.4942	24.10.11	05:02:44	24.10.11 05:02:44	3	-0.421468	0.61949	1.05754
71226	MZ-614	-24.1439	35.4956	24.10.11	06:05:54	24.10.11 06:05:54	3	-0.42139	0.619514	0.513899
71226	MZ-614	-24.1425	35.4906	24.10.11	06:40:20	24.10.11 06:40:20	3	-0.421366	0.619427	0.530326
71226	MZ-614	-23.7306	35.5083	25.10.11	13:24:08	25.10.11 13:24:08	1	-0.414176	0.619737	45.8418
71226	MZ-614	-23.7364	35.5028	25.10.11	14:31:42	25.10.11 14:31:42	2	-0.414278	0.61964	0.860538
71226	MZ-614	-23.3403	35.5011	26.10.11	16:35:59	26.10.11 16:35:59	2	-0.407365	0.619611	44.0459
71226	MZ-614	-23.3122	35.5089	27.10.11	00:37:33	27.10.11 00:37:33	3	-0.406875	0.619747	3.21913
71226	MZ-614	-23.3092	35.5214	27.10.11	02:20:51	27.10.11 02:20:51	2	-0.406822	0.619965	1.32092
71226	MZ-614	-23.0117	35.5908	28.10.11	13:00:34	28.10.11 13:00:34	2	-0.401629	0.621177	33.8337
71226	MZ-614	-23.0328	35.5814	28.10.11	14:03:20	28.10.11 14:03:20	3	-0.401998	0.621012	2.53864
71226	MZ-614	-23.0525	35.5772	28.10.11	14:42:14	28.10.11 14:42:14	2	-0.402342	0.62094	2.23407
71226	MZ-614	-23.0814	35.5711	28.10.11	15:47:32	28.10.11 15:47:32	3	-0.402846	0.620833	3.27257
71226	MZ-614	-23.1233	35.5608	28.10.11	17:28:47	28.10.11 17:28:47	3	-0.403578	0.620654	4.781
71226	MZ-614	-23.1697	35.5556	28.10.11	19:24:21	28.10.11 19:24:21	3	-0.404388	0.620562	5.18636
71226	MZ-614	-23.2106	35.5497	28.10.11	20:51:25	28.10.11 20:51:25	3	-0.405101	0.62046	4.57944
71226	MZ-614	-23.2333	35.5369	28.10.11	22:12:41	28.10.11 22:12:41	3	-0.405498	0.620237	2.84953
71226	MZ-614	-23.2778	35.5089	29.10.11	00:15:32	29.10.11 00:15:32	2	-0.406274	0.619747	5.71299
71226	MZ-614	-23.3883	35.4872	29.10.11	04:42:40	29.10.11 04:42:40	2	-0.408203	0.619369	12.4907
71226	MZ-614	-23.8869	35.5494	30.10.11	08:57:56	30.10.11 08:57:56	2	-0.416906	0.620455	55.8041
71226	MZ-614	-23.9728	35.5117	30.10.11	12:31:27	30.10.11 12:31:27	3	-0.418404	0.619796	10.2876
71226	MZ-614	-23.9917	35.5075	30.10.11	13:42:27	30.10.11 13:42:27	2	-0.418734	0.619723	2.14258
71226	MZ-614	-24.005	35.5158	30.10.11	14:14:46	30.10.11 14:14:46	1	-0.418966	0.619868	1.70725
71226	MZ-614	-23.405	35.4808	01.11.11	12:15:48	01.11.11 12:15:48	2	-0.408494	0.619257	66.8121
71226	MZ-614	-23.3722	35.48	01.11.11	13:21:57	01.11.11 13:21:57	3	-0.407922	0.619243	3.64571
71226	MZ-614	-23.31	35.4972	01.11.11	15:48:07	01.11.11 15:48:07	1	-0.406836	0.619543	7.13872
71226	MZ-614	-23.3233	35.4953	01.11.11	19:11:01	01.11.11 19:11:01	2	-0.407069	0.619509	1.49584
71226	MZ-614	-23.2233	35.5325	02.11.11	04:46:38	02.11.11 04:46:38	1	-0.405324	0.620159	11.7516
71226	MZ-614	-23.2106	35.5319	02.11.11	05:56:29	02.11.11 05:56:29	1	-0.405101	0.620149	1.42196
71226	MZ-614	-23.2064	35.5311	02.11.11	07:36:32	02.11.11 07:36:32	1	-0.405028	0.620135	0.471075
71226	MZ-614	-23.1903	35.5317	02.11.11	13:49:46	02.11.11 13:49:46	3	-0.404747	0.620145	1.79237
71226	MZ-614	-23.1253	35.5425	03.11.11	00:24:36	03.11.11 00:24:36	1	-0.403612	0.620334	7.31204
71226	MZ-614	-23.2506	35.5317	03.11.11	12:57:17	03.11.11 12:57:17	2	-0.405799	0.620145	13.9742
71226	MZ-614	-23.3406	35.4975	03.11.11	20:04:48	03.11.11 20:04:48	1	-0.40737	0.619548	10.5984
71226	MZ-614	-23.3358	35.4925	03.11.11	20:09:53	03.11.11 20:09:53	2	-0.407287	0.619461	0.732334
71226	MZ-614	-23.36	35.4936	03.11.11	21:48:38	03.11.11 21:48:38	3	-0.407709	0.61948	2.6896
71226	MZ-614	-23.3653	35.4889	03.11.11	23:12:17	03.11.11 23:12:17	2	-0.407801	0.619398	0.759452
71226	MZ-614	-23.8469	35.5553	05.11.11	05:14:45	05.11.11 05:14:45	3	-0.416208	0.620557	53.9844
71226	MZ-614	-23.8492	35.5556	05.11.11	05:19:17	05.11.11 05:19:17	1	-0.416246	0.620562	0.24871
71226	MZ-614	-23.8583	35.5528	06.11.11	18:57:44	06.11.11 18:57:44	2	-0.416406	0.620513	1.05771
71214	MZ-615	-23.9319	35.5403	27.10.11	03:49:54	27.10.11 03:49:54	1	-0.417691	0.620295	NaN
71214	MZ-615	-24.1042	35.4983	27.10.11	13:10:37	27.10.11 13:10:37	3	-0.420697	0.619563	19.6184
71214	MZ-615	-24.3067	35.3689	28.10.11	08:29:44	28.10.11 08:29:44	3	-0.424231	0.617304	26.0646
71214	MZ-615	-24.31	35.3661	28.10.11	08:34:06	28.10.11 08:34:06	2	-0.42429	0.617255	0.465423
71214	MZ-615	-24.3869	35.2936	28.10.11	13:02:38	28.10.11 13:02:38	1	-0.425632	0.61599	11.2759
71214	MZ-615	-24.8322	35.0467	29.10.11	09:14:53	29.10.11 09:14:53	3	-0.433404	0.61168	55.4503
71214	MZ-615	-24.9033	34.9967	29.10.11	13:51:59	29.10.11 13:51:59	2	-0.434645	0.610807	9.37914
71214	MZ-615	-25.3681	34.9622	30.10.11	06:35:41	30.10.11 06:35:41	2	-0.442756	0.610206	51.791
71214	MZ-615	-24.1564	35.4811	03.11.11	07:35:09	03.11.11 07:35:09	1	-0.421609	0.619262	144.559
71214	MZ-615	-23.8439	35.5342	04.11.11	02:15:16	04.11.11 02:15:16	1	-0.416154	0.620188	35.1639
71214	MZ-615	-23.8311	35.5492	04.11.11	02:39:24	04.11.11 02:39:24	1	-0.415931	0.62045	2.08478
71214	MZ-615	-23.8308	35.5506	04.11.11	03:49:31	04.11.11 03:49:31	1	-0.415927	0.620474	0.144608
71214	MZ-615	-23.805	35.5269	04.11.11	07:17:30	04.11.11 07:17:30	1	-0.415476	0.620062	3.74437
71214	MZ-615	-23.8128	35.5358	04.11.11	07:18:59	04.11.11 07:18:59	1	-0.415611	0.620217	1.25128
71214	MZ-615	-23.8117	35.5344	04.11.11	07:18:15	04.11.11 07:18:15	1	-0.415592	0.620193	0.18769
71214	MZ-615	-23.8044	35.5483	05.11.11	06:59:13	05.11.11 06:59:13	1	-0.415466	0.620435	1.62523
71214	MZ-615	-23.8025	35.5428	05.11.11	07:03:47	05.11.11 07:03:47	1	-0.415432	0.620338	0.605144
71214	MZ-615	-23.7836	35.5547	05.11.11	08:34:18	05.11.11 08:34:18	2	-0.415102	0.620547	2.4266
71214	MZ-615	-23.7831	35.5469	05.11.11	08:42:34	05.11.11 08:42:34	2	-0.415093	0.620411	0.793811
71214	MZ-615	-23.7808	35.5472	05.11.11	08:40:13	05.11.11 08:40:13	3	-0.415054	0.620416	0.248712
71214	MZ-615	-23.7731	35.5261	05.11.11	10:13:08	05.11.11 10:13:08	3	-0.414918	0.620048	2.31576
71214	MZ-615	-23.7933	35.5569	06.11.11	06:50:43	06.11.11 06:50:43	1	-0.415272	0.620586	3.86355
71214	MZ-615	-23.7983	35.5536	06.11.11	08:17:10	06.11.11 08:17:10	3	-0.415359	0.620528	0.651248
71214	MZ-615	-23.7972	35.5519	06.11.11	08:13:02	06.11.11 08:13:02	3	-0.41534	0.620498	0.209804
71214	MZ-615	-23.8036	35.5544	06.11.11	08:30:39	06.11.11 08:30:39	3	-0.415451	0.620542	0.754571
71214	MZ-615	-23.7828	35.5367	07.11.11	09:36:25	07.11.11 09:36:25	2	-0.415088	0.620232	2.93907
71214	MZ-615	-23.0439	35.5461	09.11.11	01:45:20	09.11.11 01:45:20	2	-0.402192	0.620397	82.1663
71214	MZ-615	-23.0425	35.5525	09.11.11	02:44:52	09.11.11 02:44:52	2	-0.402167	0.620508	0.671723
71214	MZ-615	-22.9925	35.5808	10.11.11	06:04:48	10.11.11 06:04:48	2	-0.401295	0.621003	6.27049
71214	MZ-615	-23.0047	35.5733	10.11.11	06:46:23	10.11.11 06:46:23	3	-0.401508	0.620872	1.56088
71214	MZ-615	-23.0306	35.5869	10.11.11	07:42:07	10.11.11 07:42:07	3	-0.401959	0.621109	3.19247
71214	MZ-615	-23.0369	35.5842	10.11.11	08:24:51	10.11.11 08:24:51	3	-0.402071	0.621061	0.765167
71214	MZ-615	-23.0408	35.5747	10.11.11	08:32:25	10.11.11 08:32:25	3	-0.402138	0.620896	1.05875
71214	MZ-615	-22.9714	35.5986	11.11.11	02:19:10	11.11.11 02:19:10	3	-0.400926	0.621313	8.09972
71214	MZ-615	-22.9708	35.5975	11.11.11	04:27:21	11.11.11 04:27:21	2	-0.400917	0.621294	0.129444
71214	MZ-615	-22.9558	35.6006	11.11.11	06:18:40	11.11.11 06:18:40	3	-0.400655	0.621347	1.69701
71214	MZ-615	-22.965	35.6033	11.11.11	07:30:39	11.11.11 07:30:39	3	-0.400815	0.621395	1.05822
71214	MZ-615	-22.9628	35.5992	11.11.11	08:01:17	11.11.11 08:01:17	3	-0.400776	0.621323	0.492992
71214	MZ-615	-22.9556	35.6108	11.11.11	08:07:19	11.11.11 08:07:19	1	-0.40065	0.621526	1.43937
71214	MZ-615	-22.9972	35.5811	12.11.11	05:35:44	12.11.11 05:35:44	2	-0.401377	0.621008	5.54294
71214	MZ-615	-22.9964	35.5869	12.11.11	05:40:41	12.11.11 05:40:41	1	-0.401363	0.621109	0.604235
71214	MZ-615	-23.0017	35.5733	12.11.11	05:55:11	12.11.11 05:55:11	3	-0.401455	0.620872	1.51174
71214	MZ-615	-23.0292	35.5767	12.11.11	07:38:46	12.11.11 07:38:46	3	-0.401935	0.62093	3.07683
71214	MZ-615	-23.0278	35.5767	12.11.11	07:52:20	12.11.11 07:52:20	2	-0.401911	0.62093	0.154438
71214	MZ-615	-23.0108	35.5819	13.11.11	05:20:31	13.11.11 05:20:31	3	-0.401615	0.621022	1.96003
71214	MZ-615	-23.0078	35.5811	13.11.11	05:24:29	13.11.11 05:24:29	1	-0.401561	0.621008	0.350303
71214	MZ-615	-23.0117	35.5836	13.11.11	05:31:04	13.11.11 05:31:04	1	-0.401629	0.621051	0.502455
71214	MZ-615	-23.0364	35.5697	13.11.11	07:08:23	13.11.11 07:08:23	2	-0.402061	0.620809	3.0947
71214	MZ-615	-23.0336	35.5733	13.11.11	07:17:10	13.11.11 07:17:10	1	-0.402012	0.620872	0.481611
71214	MZ-615	-23.0244	35.5611	13.11.11	07:31:27	13.11.11 07:31:27	2	-0.401852	0.620658	1.61348
71214	MZ-615	-22.9722	35.6142	14.11.11	06:52:13	14.11.11 06:52:13	3	-0.400941	0.621584	7.95052
71214	MZ-615	-22.9714	35.6186	14.11.11	06:58:47	14.11.11 06:58:47	2	-0.400926	0.621662	0.464347
71214	MZ-615	-22.905	35.6108	15.11.11	16:52:06	15.11.11 16:52:06	2	-0.399768	0.621526	7.42495
71214	MZ-615	-22.9303	35.6131	15.11.11	22:39:40	15.11.11 22:39:40	2	-0.400209	0.621565	2.81996
71214	MZ-615	-22.8767	35.5889	16.11.11	03:05:35	16.11.11 03:05:35	1	-0.399273	0.621143	6.45479
71214	MZ-615	-22.9197	35.6158	16.11.11	07:43:14	16.11.11 07:43:14	2	-0.400025	0.621614	5.52614
71214	MZ-615	-22.9161	35.6247	16.11.11	08:08:20	16.11.11 08:08:20	3	-0.399962	0.621769	0.994998
71214	MZ-615	-22.9136	35.6233	16.11.11	08:09:35	16.11.11 08:09:35	2	-0.399918	0.621744	0.312269
71214	MZ-615	-22.8983	35.6336	16.11.11	09:50:57	16.11.11 09:50:57	2	-0.399651	0.621924	1.99854
71214	MZ-615	-23.0489	35.5839	17.11.11	05:36:48	17.11.11 05:36:48	3	-0.402279	0.621056	17.4978
71214	MZ-615	-23.0711	35.5767	17.11.11	06:13:35	17.11.11 06:13:35	1	-0.402667	0.62093	2.57911
71214	MZ-615	-23.0372	35.5919	18.11.11	02:45:51	18.11.11 02:45:51	3	-0.402075	0.621197	4.07962
71214	MZ-615	-23.0383	35.59	18.11.11	03:15:27	18.11.11 03:15:27	3	-0.402095	0.621163	0.234207
71214	MZ-615	-23.0233	35.5744	18.11.11	04:58:00	18.11.11 04:58:00	3	-0.401833	0.620891	2.30562
71214	MZ-615	-23.0286	35.5608	18.11.11	06:09:36	18.11.11 06:09:36	3	-0.401925	0.620654	1.51149
71214	MZ-615	-23.2142	35.5697	19.11.11	05:50:56	19.11.11 05:50:56	2	-0.405164	0.620809	20.6529
71214	MZ-615	-23.2169	35.5775	19.11.11	06:32:36	19.11.11 06:32:36	3	-0.405212	0.620945	0.852727
71214	MZ-615	-23.2128	35.5844	19.11.11	07:06:02	19.11.11 07:06:02	1	-0.405139	0.621066	0.847515
71214	MZ-615	-23.2022	35.5772	19.11.11	07:34:03	19.11.11 07:34:03	3	-0.404955	0.62094	1.38651
71214	MZ-615	-23.1892	35.5797	19.11.11	08:12:08	19.11.11 08:12:08	3	-0.404727	0.620983	1.47403
71214	MZ-615	-23.1811	35.5692	19.11.11	08:44:49	19.11.11 08:44:49	1	-0.404587	0.620799	1.4023
71214	MZ-615	-23.0056	35.5956	20.11.11	08:26:05	20.11.11 08:26:05	3	-0.401523	0.62126	19.7066
71214	MZ-615	-23.0069	35.5858	20.11.11	09:01:45	20.11.11 09:01:45	2	-0.401547	0.62109	1.00699
71214	MZ-615	-23.0097	35.5953	20.11.11	10:06:27	20.11.11 10:06:27	3	-0.401595	0.621255	1.01478
71214	MZ-615	-23.1692	35.5586	21.11.11	07:10:33	21.11.11 07:10:33	2	-0.404378	0.620615	18.1218
71214	MZ-615	-23.1853	35.5517	21.11.11	08:05:30	21.11.11 08:05:30	3	-0.404659	0.620494	1.92699
71214	MZ-615	-23.2394	35.5164	22.11.11	07:46:26	22.11.11 07:46:26	1	-0.405605	0.619878	7.01958
71214	MZ-615	-23.2464	35.5422	22.11.11	08:37:34	22.11.11 08:37:34	2	-0.405726	0.620329	2.75004
71214	MZ-615	-23.2458	35.5411	22.11.11	08:36:53	22.11.11 08:36:53	2	-0.405716	0.620309	0.12924
71214	MZ-615	-23.2536	35.5639	22.11.11	09:26:41	22.11.11 09:26:41	1	-0.405852	0.620707	2.48261
71214	MZ-615	-23.21	35.5572	22.11.11	13:39:55	22.11.11 13:39:55	1	-0.405091	0.620591	4.89694
71214	MZ-615	-23.2183	35.5697	23.11.11	04:31:22	23.11.11 04:31:22	3	-0.405236	0.620809	1.5781
71214	MZ-615	-23.225	35.535	23.11.11	07:26:32	23.11.11 07:26:32	2	-0.405353	0.620203	3.62476
71214	MZ-615	-23.2336	35.5392	23.11.11	08:16:39	23.11.11 08:16:39	2	-0.405503	0.620275	1.0479
71214	MZ-615	-23.2358	35.5378	23.11.11	08:28:28	23.11.11 08:28:28	1	-0.405542	0.620251	0.284951
71214	MZ-615	-23.2369	35.5344	23.11.11	08:59:26	23.11.11 08:59:26	2	-0.405561	0.620193	0.362302
71214	MZ-615	-23.2239	35.5619	24.11.11	06:11:12	24.11.11 06:11:12	2	-0.405333	0.620673	3.16279
71214	MZ-615	-26.8481	35.0903	29.11.11	05:33:38	29.11.11 05:33:38	1	-0.468587	0.612441	405.779
71214	MZ-615	-27.985	35.3756	01.12.11	01:11:25	01.12.11 01:11:25	2	-0.48843	0.61742	129.52
71214	MZ-615	-27.9825	35.4358	01.12.11	03:02:55	01.12.11 03:02:55	2	-0.488387	0.618472	5.92545
71214	MZ-615	-27.8364	35.6581	01.12.11	13:36:36	01.12.11 13:36:36	1	-0.485837	0.62235	27.217
71214	MZ-615	-27.6347	35.9697	02.12.11	06:26:30	02.12.11 06:26:30	2	-0.482317	0.62779	37.9966
71214	MZ-615	-27.6158	35.9706	02.12.11	07:37:44	02.12.11 07:37:44	3	-0.481987	0.627805	2.10195
71214	MZ-615	-27.3094	36.2556	03.12.11	00:48:18	03.12.11 00:48:18	1	-0.47664	0.632779	44.1745
71214	MZ-615	-27.275	36.2544	03.12.11	02:15:33	03.12.11 02:15:33	1	-0.476039	0.632759	3.83162
71214	MZ-615	-27.2928	36.235	03.12.11	03:25:26	03.12.11 03:25:26	1	-0.476349	0.63242	2.75685
71214	MZ-615	-27.2444	36.28	03.12.11	06:29:58	03.12.11 06:29:58	2	-0.475505	0.633205	6.97613
71214	MZ-615	-27.2253	36.285	03.12.11	07:17:17	03.12.11 07:17:17	2	-0.475171	0.633293	2.18781
71214	MZ-615	-27.2186	36.2803	03.12.11	07:43:15	03.12.11 07:43:15	3	-0.475054	0.63321	0.876098
71214	MZ-615	-27.2119	36.2831	03.12.11	08:09:47	03.12.11 08:09:47	3	-0.474938	0.633259	0.790554
71214	MZ-615	-26.9244	36.5369	04.12.11	02:22:25	04.12.11 02:22:25	2	-0.46992	0.63769	40.6688
71214	MZ-615	-26.9175	36.5353	04.12.11	03:17:56	04.12.11 03:17:56	1	-0.469799	0.637661	0.789669
71214	MZ-615	-26.9256	36.5478	04.12.11	03:28:47	04.12.11 03:28:47	3	-0.46994	0.637879	1.52913
71214	MZ-615	-26.9097	36.5933	04.12.11	05:12:56	04.12.11 05:12:56	1	-0.469663	0.638674	4.84774
71214	MZ-615	-26.8967	36.6192	04.12.11	06:17:37	04.12.11 06:17:37	2	-0.469435	0.639125	2.9444
71214	MZ-615	-26.5172	36.5019	06.12.11	00:20:17	06.12.11 00:20:17	2	-0.462813	0.637079	43.7695
71214	MZ-615	-26.5006	36.5383	06.12.11	07:35:25	06.12.11 07:35:25	2	-0.462522	0.637714	4.06757
71214	MZ-615	-26.4956	36.5278	06.12.11	07:55:11	06.12.11 07:55:11	3	-0.462435	0.63753	1.18849
71214	MZ-615	-26.4944	36.5272	06.12.11	08:11:55	06.12.11 08:11:55	3	-0.462415	0.63752	0.135357
71214	MZ-615	-26.4831	36.5167	06.12.11	09:36:42	06.12.11 09:36:42	3	-0.462217	0.637336	1.64539
71214	MZ-615	-29.9428	37.8628	13.12.11	06:11:14	13.12.11 06:11:14	3	-0.5226	0.66083	406.674
71214	MZ-615	-29.9481	37.885	13.12.11	07:10:19	13.12.11 07:10:19	1	-0.522692	0.661218	2.22009
71214	MZ-615	-29.9531	37.8897	13.12.11	07:11:58	13.12.11 07:11:58	1	-0.522779	0.6613	0.718402
71214	MZ-615	-29.9372	37.8908	13.12.11	07:49:28	13.12.11 07:49:28	3	-0.522503	0.66132	1.76384
71214	MZ-615	-29.9311	37.8925	13.12.11	08:49:30	13.12.11 08:49:30	2	-0.522396	0.661349	0.698245
71214	MZ-615	-29.7419	37.8003	13.12.11	20:15:25	13.12.11 20:15:25	2	-0.519095	0.659739	22.838
71214	MZ-615	-29.6892	37.775	14.12.11	04:27:46	14.12.11 04:27:46	3	-0.518174	0.659298	6.35609
71214	MZ-615	-29.6861	37.7556	14.12.11	06:49:16	14.12.11 06:49:16	1	-0.51812	0.658959	1.9088
71214	MZ-615	-29.69	37.7481	14.12.11	07:41:22	14.12.11 07:41:22	2	-0.518188	0.658828	0.84373
71214	MZ-615	-29.6789	37.7375	14.12.11	08:27:01	14.12.11 08:27:01	1	-0.517994	0.658644	1.60195
71214	MZ-615	-29.6831	37.7236	14.12.11	08:27:32	14.12.11 08:27:32	1	-0.518067	0.658401	1.41949
71214	MZ-615	-29.6694	37.7658	14.12.11	13:00:20	14.12.11 13:00:20	2	-0.517829	0.659138	4.35083
71214	MZ-615	-29.6089	37.8444	15.12.11	04:07:06	15.12.11 04:07:06	1	-0.516773	0.66051	10.1519
71214	MZ-615	-29.6211	37.8744	15.12.11	07:25:49	15.12.11 07:25:49	3	-0.516986	0.661034	3.20272
71214	MZ-615	-29.5369	37.8217	15.12.11	20:21:50	15.12.11 20:21:50	2	-0.515517	0.660113	10.6601
71214	MZ-615	-29.5397	37.8264	15.12.11	20:37:52	15.12.11 20:37:52	1	-0.515565	0.660195	0.551458
71214	MZ-615	-29.5028	37.8139	16.12.11	19:40:01	16.12.11 19:40:01	1	-0.514921	0.659977	4.28238
71214	MZ-615	-29.5044	37.8311	16.12.11	20:13:11	16.12.11 20:13:11	2	-0.51495	0.660277	1.67696
71214	MZ-615	-29.5064	37.8319	16.12.11	21:58:53	16.12.11 21:58:53	1	-0.514984	0.660292	0.230763
71214	MZ-615	-29.5275	37.8353	17.12.11	00:03:17	17.12.11 00:03:17	2	-0.515352	0.66035	2.3695
71214	MZ-615	-29.4603	38.0422	17.12.11	21:26:54	17.12.11 21:26:54	1	-0.514179	0.663962	21.3784
71214	MZ-615	-23.1322	38.2561	16.01.12	12:57:46	16.01.12 12:57:46	2	-0.403733	0.667695	703.97
71214	MZ-615	-22.5303	37.7247	17.01.12	10:07:20	17.01.12 10:07:20	2	-0.393228	0.658421	86.2885
71214	MZ-615	-22.5044	37.675	17.01.12	12:10:40	17.01.12 12:10:40	3	-0.392777	0.657553	5.85974
70810	MZ-165	-23.8936	35.5686	25.11.11	15:40:33	25.11.11 15:40:33	1	-0.417022	0.620789	NaN
70810	MZ-165	-23.8914	35.5547	25.11.11	16:08:30	25.11.11 16:08:30	3	-0.416983	0.620547	1.43349
70810	MZ-165	-23.9036	35.5464	25.11.11	17:50:11	25.11.11 17:50:11	1	-0.417197	0.620402	1.60148
70810	MZ-165	-23.9064	35.5408	25.11.11	18:12:06	25.11.11 18:12:06	1	-0.417245	0.620305	0.643705
70810	MZ-165	-23.8339	35.5583	26.11.11	03:01:16	26.11.11 03:01:16	1	-0.41598	0.62061	8.25569
70810	MZ-165	-23.8111	35.5525	26.11.11	03:19:46	26.11.11 03:19:46	2	-0.415582	0.620508	2.60135
70810	MZ-165	-23.8936	35.5686	10.12.11	12:00:00	10.12.11 12:00	GPS	-0.417022	0.620789	9.31875
71222	MZ-471	-23.8164	35.5456	28.11.11	14:13:55	28.11.11 14:13:55	2	-0.415674	0.620387	NaN
71222	MZ-471	-23.8153	35.5356	28.11.11	18:16:40	28.11.11 18:16:40	1	-0.415655	0.620212	1.02474
71222	MZ-471	-23.8222	35.5419	28.11.11	18:17:53	28.11.11 18:17:53	1	-0.415776	0.620324	1.00928
71222	MZ-471	-23.8306	35.5428	28.11.11	18:43:51	28.11.11 18:43:51	2	-0.415922	0.620338	0.930494
71222	MZ-471	-23.8714	35.5508	28.11.11	20:20:29	28.11.11 20:20:29	3	-0.416634	0.620479	4.61378
71222	MZ-471	-23.8769	35.5589	29.11.11	05:32:30	29.11.11 05:32:30	1	-0.416731	0.62062	1.02593
71222	MZ-471	-23.8711	35.5589	29.11.11	05:33:42	29.11.11 05:33:42	1	-0.416629	0.62062	0.648637
71222	MZ-471	-23.8767	35.5497	29.11.11	05:59:41	29.11.11 05:59:41	2	-0.416726	0.62046	1.1182
71222	MZ-471	-23.8658	35.5344	29.11.11	07:17:56	29.11.11 07:17:56	1	-0.416537	0.620193	1.96581
71222	MZ-471	-23.9611	35.5319	29.11.11	13:58:20	29.11.11 13:58:20	3	-0.4182	0.620149	10.5975
71222	MZ-471	-24.1175	35.5181	30.11.11	17:55:17	30.11.11 17:55:17	1	-0.42093	0.619907	17.4468
71222	MZ-471	-24.1922	35.4817	30.11.11	19:33:39	30.11.11 19:33:39	1	-0.422234	0.619272	9.09207
71222	MZ-471	-24.1928	35.4803	30.11.11	19:35:13	30.11.11 19:35:13	3	-0.422244	0.619248	0.153823
71222	MZ-471	-24.2383	35.45	30.11.11	20:44:45	30.11.11 20:44:45	2	-0.423039	0.618719	5.92349
71222	MZ-471	-27.3153	36.0481	06.12.11	09:33:24	06.12.11 09:33:24	1	-0.476742	0.629157	347.34
71222	MZ-471	-27.2761	36.1086	06.12.11	12:50:23	06.12.11 12:50:23	3	-0.476058	0.630214	7.40081
71222	MZ-471	-26.8225	36.1444	07.12.11	13:25:00	07.12.11 13:25:00	2	-0.468141	0.63084	50.5639
71222	MZ-471	-26.8039	36.1583	07.12.11	14:21:52	07.12.11 14:21:52	3	-0.467816	0.631082	2.48645
71222	MZ-471	-26.8047	36.1678	07.12.11	14:39:00	07.12.11 14:39:00	1	-0.467831	0.631247	0.941905
71222	MZ-471	-26.6647	36.1961	07.12.11	18:07:46	07.12.11 18:07:46	1	-0.465387	0.631741	15.8195
71222	MZ-471	-26.1953	36.1972	08.12.11	12:23:12	08.12.11 12:23:12	3	-0.457194	0.631761	52.2
71222	MZ-471	-26.1419	36.1364	08.12.11	14:54:38	08.12.11 14:54:38	1	-0.456263	0.630699	8.48686
71222	MZ-471	-26.1225	36.1089	08.12.11	15:52:56	08.12.11 15:52:56	2	-0.455924	0.630219	3.49448
71222	MZ-471	-26.4292	36.19	10.12.11	12:09:06	10.12.11 12:09:06	3	-0.461276	0.631635	35.0457
71222	MZ-471	-26.2381	36.1856	11.12.11	00:18:09	11.12.11 00:18:09	1	-0.45794	0.631557	21.2552
71222	MZ-471	-25.9997	36.1428	12.12.11	09:09:43	12.12.11 09:09:43	1	-0.453781	0.63081	26.8434
71222	MZ-471	-25.9422	36.0517	12.12.11	18:51:35	12.12.11 18:51:35	1	-0.452777	0.62922	11.1281
71222	MZ-471	-25.9781	35.8486	13.12.11	13:11:21	13.12.11 13:11:21	2	-0.453403	0.625676	20.6879
71222	MZ-471	-25.9908	35.8306	13.12.11	14:00:29	13.12.11 14:00:29	3	-0.453626	0.625361	2.29691
71222	MZ-471	-25.8361	35.6689	15.12.11	06:23:41	15.12.11 06:23:41	1	-0.450925	0.62254	23.6099
71222	MZ-471	-25.8519	35.6628	15.12.11	07:26:31	15.12.11 07:26:31	1	-0.451202	0.622433	1.86378
71222	MZ-471	-25.8489	35.6217	15.12.11	07:58:19	15.12.11 07:58:19	3	-0.451148	0.621715	4.12792
71222	MZ-471	-25.9611	35.2922	15.12.11	21:34:06	15.12.11 21:34:06	2	-0.453107	0.615965	35.2353
71222	MZ-471	-25.9592	35.2097	16.12.11	00:11:54	16.12.11 00:11:54	1	-0.453073	0.614526	8.25079
71222	MZ-471	-26.0739	34.9775	16.12.11	07:13:04	16.12.11 07:13:04	2	-0.455075	0.610473	26.4805
71222	MZ-471	-26.0836	34.97	16.12.11	07:37:24	16.12.11 07:37:24	3	-0.455245	0.610342	1.31521
71222	MZ-471	-26.0906	34.9364	16.12.11	07:44:40	16.12.11 07:44:40	1	-0.455366	0.609755	3.44432
71222	MZ-471	-26.2058	34.8364	16.12.11	15:14:12	16.12.11 15:14:12	2	-0.457378	0.60801	16.2462
71222	MZ-471	-26.2969	34.6894	16.12.11	19:39:38	16.12.11 19:39:38	1	-0.458968	0.605445	17.8153
71222	MZ-471	-26.3011	34.6744	16.12.11	19:57:06	16.12.11 19:57:06	2	-0.459041	0.605183	1.56542
71222	MZ-471	-26.3139	34.6731	16.12.11	20:14:00	16.12.11 20:14:00	1	-0.459264	0.605159	1.42755
71222	MZ-471	-26.3286	34.64	16.12.11	21:22:07	16.12.11 21:22:07	2	-0.459521	0.604582	3.67883
71222	MZ-471	-26.3408	34.6131	16.12.11	21:58:31	16.12.11 21:58:31	1	-0.459734	0.604112	3.00949
71222	MZ-471	-26.5933	34.4444	17.12.11	04:58:19	17.12.11 04:58:19	1	-0.464141	0.601169	32.7107
71222	MZ-471	-26.7361	34.1708	17.12.11	12:38:38	17.12.11 12:38:38	2	-0.466633	0.596394	31.4844
71222	MZ-471	-26.7644	34.1486	17.12.11	13:21:31	17.12.11 13:21:31	1	-0.467128	0.596006	3.84638
71222	MZ-471	-26.8011	34.1242	17.12.11	14:09:37	17.12.11 14:09:37	3	-0.467768	0.595579	4.74458
71222	MZ-471	-26.8992	33.9886	17.12.11	19:53:09	17.12.11 19:53:09	1	-0.469479	0.593213	17.3128
71222	MZ-471	-26.9019	33.96	17.12.11	21:10:00	17.12.11 21:10:00	2	-0.469528	0.592714	2.85392
71222	MZ-471	-26.9036	33.9553	17.12.11	21:12:47	17.12.11 21:12:47	1	-0.469557	0.592631	0.5036
71222	MZ-471	-26.9756	33.8969	17.12.11	23:11:53	17.12.11 23:11:53	1	-0.470812	0.591613	9.87092
71222	MZ-471	-27.0194	33.895	17.12.11	23:51:45	17.12.11 23:51:45	1	-0.471578	0.591579	4.88402
71222	MZ-471	-27.04	33.8733	18.12.11	00:40:16	18.12.11 00:40:16	2	-0.471937	0.591201	3.13527
71222	MZ-471	-27.3092	33.7331	18.12.11	08:46:05	18.12.11 08:46:05	1	-0.476635	0.588753	32.9903
71222	MZ-471	-27.3539	33.6686	18.12.11	10:27:21	18.12.11 10:27:21	1	-0.477415	0.587628	8.07803
71222	MZ-471	-28.1047	35.6253	21.12.11	13:35:08	21.12.11 13:35:08	1	-0.49052	0.621778	209.899
71222	MZ-471	-28.0792	35.6814	21.12.11	14:20:27	21.12.11 14:20:27	1	-0.490074	0.622758	6.19448
71222	MZ-471	-28.0622	35.7181	21.12.11	15:13:09	21.12.11 15:13:09	2	-0.489778	0.623398	4.06107
71222	MZ-471	-28.0311	35.7153	21.12.11	15:43:27	21.12.11 15:43:27	1	-0.489235	0.623349	3.47012
71222	MZ-471	-27.72	36.1897	22.12.11	06:57:00	22.12.11 06:57:00	2	-0.483805	0.63163	58.0645
71222	MZ-471	-27.6553	36.2386	22.12.11	08:58:48	22.12.11 08:58:48	2	-0.482676	0.632483	8.65827
71222	MZ-471	-27.615	36.3217	22.12.11	12:28:05	22.12.11 12:28:05	1	-0.481973	0.633933	9.32739
71222	MZ-471	-27.0556	36.6056	23.12.11	18:52:22	23.12.11 18:52:22	1	-0.472209	0.638887	68.2357
71222	MZ-471	-26.9853	36.5625	23.12.11	21:10:25	23.12.11 21:10:25	2	-0.470982	0.638136	8.90263
71222	MZ-471	-26.6897	36.4314	24.12.11	18:33:09	24.12.11 18:33:09	1	-0.465824	0.635848	35.3452
71222	MZ-471	-26.6547	36.4408	24.12.11	20:08:32	24.12.11 20:08:32	2	-0.465213	0.636013	4.00336
71222	MZ-471	-26.5914	36.345	25.12.11	00:19:58	25.12.11 00:19:58	2	-0.464107	0.63434	11.8468
71222	MZ-471	-26.5664	36.2972	25.12.11	02:04:29	25.12.11 02:04:29	1	-0.463671	0.633506	5.50469
71222	MZ-471	-26.5628	36.2925	25.12.11	02:46:57	25.12.11 02:46:57	2	-0.463608	0.633424	0.617905
71222	MZ-471	-26.5558	36.2878	25.12.11	03:20:39	25.12.11 03:20:39	3	-0.463487	0.633341	0.903808
71222	MZ-471	-26.4161	36.0556	26.12.11	00:55:07	26.12.11 00:55:07	2	-0.461048	0.629288	27.8484
71222	MZ-471	-26.3942	36.0522	26.12.11	01:53:00	26.12.11 01:53:00	2	-0.460665	0.62923	2.46259
71222	MZ-471	-26.355	35.8406	26.12.11	15:07:05	26.12.11 15:07:05	2	-0.459982	0.625536	21.5314
71222	MZ-471	-26.2928	35.8686	26.12.11	20:07:43	26.12.11 20:07:43	1	-0.458896	0.626025	7.46245
71222	MZ-471	-26.2933	35.8428	26.12.11	21:00:14	26.12.11 21:00:14	2	-0.458905	0.625574	2.57608
71222	MZ-471	-26.2936	35.8456	26.12.11	21:00:49	26.12.11 21:00:49	3	-0.45891	0.625623	0.278635
71222	MZ-471	-26.2169	35.7147	27.12.11	08:55:12	27.12.11 08:55:12	1	-0.457572	0.623339	15.5853
71222	MZ-471	-26.6017	36.5794	31.12.11	02:36:21	31.12.11 02:36:21	2	-0.464287	0.638432	96.1578
71222	MZ-471	-26.5894	36.5583	31.12.11	03:22:51	31.12.11 03:22:51	2	-0.464073	0.638063	2.50062
71222	MZ-471	-26.5772	36.5467	31.12.11	04:16:06	31.12.11 04:16:06	3	-0.46386	0.63786	1.78687
71222	MZ-471	-26.5489	36.5272	31.12.11	05:58:06	31.12.11 05:58:06	3	-0.463366	0.63752	3.69672
71222	MZ-471	-26.5353	36.5103	31.12.11	06:45:21	31.12.11 06:45:21	3	-0.463128	0.637225	2.26534
71222	MZ-471	-26.5228	36.4969	31.12.11	07:35:51	31.12.11 07:35:51	3	-0.46291	0.636992	1.92133
71222	MZ-471	-26.5186	36.4919	31.12.11	07:37:51	31.12.11 07:37:51	3	-0.462837	0.636905	0.679806
71222	MZ-471	-26.5067	36.4764	31.12.11	08:22:51	31.12.11 08:22:51	2	-0.462629	0.636633	2.03953
71222	MZ-471	-26.4925	36.4564	31.12.11	09:13:51	31.12.11 09:13:51	3	-0.462381	0.636284	2.53822
71222	MZ-471	-26.4511	36.3981	31.12.11	11:43:06	31.12.11 11:43:06	2	-0.461659	0.635266	7.40903
71222	MZ-471	-26.4397	36.3756	31.12.11	12:30:21	31.12.11 12:30:21	1	-0.46146	0.634873	2.57327
71222	MZ-471	-26.4281	36.3556	31.12.11	13:30:21	31.12.11 13:30:21	2	-0.461257	0.634524	2.37667
71222	MZ-471	-26.4161	36.3281	31.12.11	14:13:06	31.12.11 14:13:06	2	-0.461048	0.634044	3.04353
71222	MZ-471	-26.4086	36.3097	31.12.11	14:59:24	31.12.11 14:59:24	2	-0.460917	0.633724	2.00723
71222	MZ-471	-26.3994	36.3081	31.12.11	15:09:22	31.12.11 15:09:22	2	-0.460757	0.633695	1.03271
71222	MZ-471	-26.3894	36.2831	31.12.11	15:53:22	31.12.11 15:53:22	3	-0.460583	0.633259	2.72708
71222	MZ-471	-26.3808	36.2664	31.12.11	16:38:37	31.12.11 16:38:37	2	-0.460432	0.632968	1.91652
71222	MZ-471	-26.3669	36.2114	31.12.11	18:18:23	31.12.11 18:18:23	2	-0.46019	0.632008	5.69265
71222	MZ-471	-26.3725	36.2081	31.12.11	18:21:08	31.12.11 18:21:08	2	-0.460287	0.63195	0.701351
71222	MZ-471	-26.3631	36.1939	31.12.11	19:04:02	31.12.11 19:04:02	3	-0.460122	0.631703	1.75922
71222	MZ-471	-26.3578	36.1717	31.12.11	20:04:09	31.12.11 20:04:09	3	-0.46003	0.631315	2.29052
71222	MZ-471	-26.3567	36.1758	31.12.11	20:04:09	31.12.11 20:04:09	2	-0.460011	0.631387	0.433142
71222	MZ-471	-26.3536	36.1597	31.12.11	20:44:03	31.12.11 20:44:03	3	-0.459957	0.631106	1.64083
71222	MZ-471	-26.3558	36.1503	31.12.11	21:43:09	31.12.11 21:43:09	2	-0.459996	0.630941	0.972923
71222	MZ-471	-26.3442	36.1467	31.12.11	21:49:09	31.12.11 21:49:09	3	-0.459792	0.630878	1.34625
71222	MZ-471	-26.3331	36.1103	31.12.11	23:07:09	31.12.11 23:07:09	1	-0.459599	0.630243	3.83091
71222	MZ-471	-26.3203	36.0564	01.01.12	00:46:09	01.01.12 00:46:09	1	-0.459376	0.629303	5.55543
71222	MZ-471	-26.3225	36.0556	01.01.12	01:28:54	01.01.12 01:28:54	3	-0.459414	0.629288	0.260684
71222	MZ-471	-26.3208	36.0503	01.01.12	02:11:39	01.01.12 02:11:39	1	-0.459385	0.629196	0.557708
71222	MZ-471	-26.3111	36.0447	01.01.12	02:28:32	01.01.12 02:28:32	2	-0.459216	0.629099	1.21462
71222	MZ-471	-26.3156	36.0264	01.01.12	03:11:40	01.01.12 03:11:40	2	-0.459293	0.628779	1.89299
71222	MZ-471	-26.3119	36.0161	01.01.12	03:50:33	01.01.12 03:50:33	2	-0.45923	0.6286	1.1003
71222	MZ-471	-26.3031	35.9803	01.01.12	05:35:40	01.01.12 05:35:40	2	-0.459075	0.627974	3.70604
71222	MZ-471	-26.3044	35.9808	01.01.12	05:46:33	01.01.12 05:46:33	2	-0.459099	0.627984	0.164065
71222	MZ-471	-26.2969	35.9681	01.01.12	06:16:56	01.01.12 06:16:56	3	-0.458968	0.627761	1.52247
71222	MZ-471	-26.2967	35.9494	01.01.12	07:16:56	01.01.12 07:16:56	3	-0.458963	0.627436	1.85555
71222	MZ-471	-26.2956	35.9517	01.01.12	07:25:11	01.01.12 07:25:11	2	-0.458944	0.627475	0.253653
71222	MZ-471	-26.2964	35.94	01.01.12	08:00:08	01.01.12 08:00:08	3	-0.458959	0.627271	1.16671
71222	MZ-471	-26.2886	35.9094	01.01.12	09:01:45	01.01.12 09:01:45	3	-0.458823	0.626738	3.16651
71222	MZ-471	-26.29	35.9144	01.01.12	08:55:34	01.01.12 08:55:34	3	-0.458847	0.626825	0.521846
71222	MZ-471	-26.2794	35.8628	01.01.12	10:38:41	01.01.12 10:38:41	1	-0.458663	0.625924	5.28309
71222	MZ-471	-26.2819	35.8136	01.01.12	13:11:42	01.01.12 13:11:42	2	-0.458706	0.625065	4.90986
71222	MZ-471	-26.2764	35.8097	01.01.12	13:54:27	01.01.12 13:54:27	3	-0.45861	0.624998	0.729349
71222	MZ-471	-26.2717	35.7911	01.01.12	14:58:03	01.01.12 14:58:03	3	-0.458527	0.624673	1.92852
71222	MZ-471	-26.2761	35.7686	01.01.12	15:42:14	01.01.12 15:42:14	2	-0.458605	0.62428	2.2972
71222	MZ-471	-26.2714	35.7592	01.01.12	16:15:14	01.01.12 16:15:14	3	-0.458522	0.624115	1.07818
71222	MZ-471	-26.2664	35.7203	01.01.12	17:52:57	01.01.12 17:52:57	3	-0.458435	0.623436	3.91732
71222	MZ-471	-26.2722	35.7161	01.01.12	18:10:57	01.01.12 18:10:57	2	-0.458537	0.623364	0.770285
71222	MZ-471	-26.2689	35.7025	01.01.12	18:40:57	01.01.12 18:40:57	2	-0.458479	0.623126	1.40687
71222	MZ-471	-26.2711	35.6583	01.01.12	20:19:54	01.01.12 20:19:54	2	-0.458517	0.622355	4.41081
71222	MZ-471	-26.2756	35.6308	01.01.12	21:30:42	01.01.12 21:30:42	1	-0.458595	0.621875	2.78614
71222	MZ-471	-26.2872	35.5933	01.01.12	22:56:57	01.01.12 22:56:57	1	-0.458799	0.621221	3.95745
71222	MZ-471	-26.2908	35.5931	01.01.12	22:59:12	01.01.12 22:59:12	2	-0.458862	0.621216	0.402491

## Sheet: TAT
DeployID	Date	LocationQuality	Latitude	Longitude	-40 to 2 C	2.1 to 5 C	5.1 to 10 C	10.1 to 15.0 C	15.1 to 17.5	17.6 to20.0 C	20.1 to 22.0 C	22.1 to 25.0 C	25.1 to 27.0 C	27.1 to 29	29.1 to 31 C	31.1 to 60 C
71226	2011-10-12 07:00:00	2	-23.876	35.555	0	0	0	3	4	7	8	18	20	19	3	19
71226	2011-10-12 10:59:59	2	-23.876	35.555	0	0	0	0	0	0	0	88	11	1	0	0
71226	2011-10-12 16:59:59	2	-23.877	35.555	0	0	0	0	0	0	0	100	0	0	0	0
71226	2011-10-12 18:00:00	2	-23.877	35.555	0	0	0	0	0	0	0	100	0	0	0	0
71226	2011-10-12 22:59:59	2	-23.876	35.553	0	0	0	0	0	0	0	100	0	0	0	0
71226	2011-10-13 04:59:59	3	-23.887	35.552	0	0	0	0	0	0	0	100	0	0	0	0
71226	2011-10-13 06:00:00	3	-23.9	35.537	0	0	0	0	0	0	0	100	0	0	0	0
71226	2011-10-13 10:59:59	3	-23.9	35.537	0	0	0	0	0	0	0	100	0	0	0	0
71226	2011-10-13 16:59:59	3	-23.902	35.558	0	0	0	0	0	0	0	100	0	0	0	0
71226	2011-10-13 18:00:00	3	-23.902	35.558	0	0	0	0	0	0	0	100	0	0	0	0
71226	2011-10-13 22:59:59	1	-23.921	35.549	0	0	0	0	0	0	0	100	0	0	0	0
71226	2011-10-14 04:59:59	1	-23.921	35.549	0	0	0	0	0	0	0	100	0	0	0	0
71226	2011-10-14 06:00:00	1	-23.921	35.549	0	0	0	0	0	0	0	100	0	0	0	0
71226	2011-10-14 10:59:59	2	-23.943	35.536	0	0	0	0	0	0	0	100	0	0	0	0
71226	2011-10-14 16:59:59	1	-23.882	35.555	0	0	0	0	0	0	0	100	0	0	0	0
71226	2011-10-14 18:00:00	2	-23.908	35.548	0	0	0	0	0	0	0	100	0	0	0	0
71226	2011-10-14 22:59:59	2	-23.908	35.548	0	0	0	0	0	0	0	100	0	0	0	0
71226	2011-10-15 04:59:59	3	-23.885	35.552	0	0	0	0	0	0	0	100	0	0	0	0
71226	2011-10-15 06:00:00	3	-23.887	35.564	0	0	0	0	0	0	0	100	0	0	0	0
71226	2011-10-15 10:59:59	3	-23.909	35.538	0	0	0	0	0	0	0	100	0	0	0	0
71226	2011-10-15 16:59:59	3	-23.909	35.538	0	0	0	0	0	0	0	100	0	0	0	0
71226	2011-10-15 18:00:00	1	-23.875	35.554	0	0	0	0	0	0	0	100	0	0	0	0
71226	2011-10-15 22:59:59	1	-23.875	35.554	0	0	0	0	0	0	0	100	0	0	0	0
71226	2011-10-16 04:59:59	2	-23.92	35.533	0	0	0	0	0	0	0	100	0	0	0	0
71226	2011-10-16 06:00:00	2	-23.92	35.533	0	0	0	0	0	0	0	100	0	0	0	0
71226	2011-10-16 10:59:59	1	-23.87	35.556	0	0	0	0	0	0	0	100	0	0	0	0
71226	2011-10-16 16:59:59	2	-23.918	35.543	0	0	0	0	0	0	0	100	0	0	0	0
71226	2011-10-16 18:00:00	2	-23.918	35.543	0	0	0	0	0	0	0	100	0	0	0	0
71226	2011-10-16 22:59:59	2	-23.904	35.55	0	0	0	0	0	0	0	100	0	0	0	0
71226	2011-10-17 04:59:59	1	-23.876	35.559	0	0	0	0	0	0	0	100	0	0	0	0
71226	2011-10-17 06:00:00	3	-23.882	35.557	0	0	0	0	0	0	0	100	0	0	0	0
71226	2011-10-17 18:00:00	1	-23.832	35.542	0	0	0	0	0	0	0	100	0	0	0	0
71226	2011-10-17 22:59:59	1	-23.832	35.542	0	0	0	0	0	0	0	100	0	0	0	0
71226	2011-10-18 04:59:59	1	-23.831	35.535	0	0	0	0	0	0	0	100	0	0	0	0
71226	2011-10-18 06:00:00	1	-23.82	35.536	0	0	0	0	0	0	0	80	20	0	0	0
71226	2011-10-18 10:59:59	3	-23.815	35.545	0	0	0	0	0	0	0	100	0	0	0	0
71226	2011-10-18 16:59:59	3	-23.815	35.545	0	0	0	0	0	0	0	100	0	0	0	0
71226	2011-10-18 18:00:00	3	-23.815	35.545	0	0	0	0	0	0	23	77	0	0	0	0
71226	2011-10-18 22:59:59	2	-23.942	35.521	0	0	0	0	0	0	1	99	0	0	0	0
71226	2011-10-19 04:59:59	2	-23.942	35.521	0	0	0	0	0	0	0	100	0	0	0	0
71226	2011-10-19 06:00:00	2	-23.942	35.521	0	0	0	0	0	0	57	43	0	0	0	0
71226	2011-10-19 10:59:59	2	-23.942	35.521	0	0	0	0	0	0	86	14	0	0	0	0
71226	2011-10-19 16:59:59	1	-23.985	35.554	0	0	0	0	0	0	100	0	0	0	0	0
71226	2011-10-19 18:00:00	1	-23.986	35.517	0	0	0	0	0	0	100	0	0	0	0	0
71226	2011-10-19 22:59:59	2	-23.926	35.54	0	0	0	0	0	0	77	23	0	0	0	0
71226	2011-10-20 04:59:59	3	-23.969	35.512	0	0	0	0	0	0	100	0	0	0	0	0
71226	2011-10-20 06:00:00	2	-24.103	35.492	0	0	0	0	0	5	93	2	0	0	0	0
71226	2011-10-20 10:59:59	2	-24.103	35.492	0	0	0	0	0	10	90	0	0	0	0	0
71226	2011-10-20 16:59:59	3	-24.117	35.503	0	0	0	0	0	0	100	0	0	0	0	0
71226	2011-10-20 18:00:00	3	-24.117	35.503	0	0	0	0	0	0	100	0	0	0	0	0
71226	2011-10-20 22:59:59	1	-24.059	35.514	0	0	0	0	0	0	65	35	0	0	0	0
71226	2011-10-21 04:59:59	1	-24.059	35.514	0	0	0	0	0	0	17	83	0	0	0	0
71226	2011-10-21 06:00:00	1	-24.03	35.502	0	0	0	0	0	0	0	100	0	0	0	0
71226	2011-10-21 10:59:59	2	-23.836	35.547	0	0	0	0	0	0	0	100	0	0	0	0
71226	2011-10-21 16:59:59	3	-23.816	35.551	0	0	0	0	0	0	0	100	0	0	0	0
71226	2011-10-21 18:00:00	3	-23.816	35.551	0	0	0	0	0	0	3	97	0	0	0	0
71226	2011-10-21 22:59:59	3	-23.816	35.551	0	0	0	0	0	0	18	82	0	0	0	0
71226	2011-10-22 04:59:59	2	-23.986	35.514	0	0	0	0	0	0	14	86	0	0	0	0
71226	2011-10-22 06:00:00	2	-23.986	35.514	0	0	0	0	0	0	19	81	0	0	0	0
71226	2011-10-22 10:59:59	2	-23.986	35.514	0	0	0	0	0	0	5	95	0	0	0	0
71226	2011-10-22 16:59:59	3	-24.153	35.481	0	0	0	0	0	0	8	92	0	0	0	0
71226	2011-10-22 18:00:00	3	-24.153	35.481	0	0	0	0	0	0	30	70	0	0	0	0
71226	2011-10-22 22:59:59	3	-24.153	35.481	0	0	0	0	0	0	64	36	0	0	0	0
71226	2011-10-23 04:59:59	2	-24.281	35.397	0	0	0	0	0	0	70	30	0	0	0	0
71226	2011-10-23 06:00:00	2	-24.281	35.397	0	0	0	0	0	0	26	74	0	0	0	0
71226	2011-10-23 10:59:59	2	-24.3	35.379	0	0	0	0	0	0	81	19	0	0	0	0
71226	2011-10-23 16:59:59	2	-24.22	35.443	0	0	0	0	0	0	100	0	0	0	0	0
71226	2011-10-23 18:00:00	2	-24.22	35.443	0	0	0	0	0	0	100	0	0	0	0	0
71226	2011-10-24 04:59:59	3	-24.142	35.491	0	0	0	0	0	0	100	0	0	0	0	0
71226	2011-10-24 06:00:00	3	-24.142	35.491	0	0	0	0	0	0	88	12	0	0	0	0
71226	2011-10-24 10:59:59	3	-24.142	35.491	0	0	0	0	0	0	72	28	0	0	0	0
71226	2011-10-24 16:59:59	3	-24.142	35.491	0	0	0	0	0	0	0	100	0	0	0	0
71226	2011-10-24 18:00:00	3	-24.142	35.491	0	0	0	0	0	0	25	75	0	0	0	0
71226	2011-10-24 22:59:59	1	-23.73	35.508	0	0	0	0	0	0	38	63	0	0	0	0
71226	2011-10-25 04:59:59	1	-23.73	35.508	0	0	0	0	0	0	73	27	0	0	0	0
71226	2011-10-25 06:00:00	1	-23.73	35.508	0	0	0	0	0	0	26	74	0	0	0	0
71226	2011-10-25 10:59:59	1	-23.73	35.508	0	0	0	0	0	0	20	80	0	0	0	0
71226	2011-10-25 16:59:59	2	-23.736	35.503	0	0	0	0	0	0	0	100	0	0	0	0
71226	2011-10-25 18:00:00	2	-23.736	35.503	0	0	0	0	0	0	0	100	0	0	0	0
71226	2011-10-25 22:59:59	2	-23.736	35.503	0	0	0	0	0	0	9	91	0	0	0	0
71226	2011-10-26 04:59:59	2	-23.34	35.501	0	0	0	0	0	0	0	100	0	0	0	0
71226	2011-10-26 06:00:00	2	-23.34	35.501	0	0	0	0	0	0	31	68	1	0	0	0
71226	2011-10-26 10:59:59	2	-23.34	35.501	0	0	0	0	0	0	0	100	0	0	0	0
71226	2011-10-26 16:59:59	2	-23.34	35.501	0	0	0	0	0	0	0	100	0	0	0	0
71226	2011-10-26 22:59:59	3	-23.312	35.509	0	0	0	0	0	0	23	77	0	0	0	0
71226	2011-10-27 04:59:59	2	-23.309	35.521	0	0	0	0	0	0	4	96	0	0	0	0
71226	2011-10-27 06:00:00	2	-23.309	35.521	0	0	0	0	0	0	0	100	0	0	0	0
71226	2011-10-27 10:59:59	2	-23.309	35.521	0	0	0	0	0	0	0	77	23	0	0	0
71226	2011-10-27 16:59:59	2	-23.309	35.521	0	0	0	0	0	0	0	0	100	0	0	0
71226	2011-10-27 18:00:00	2	-23.012	35.591	0	0	0	0	0	0	0	18	82	0	0	0
71226	2011-10-27 22:59:59	2	-23.012	35.591	0	0	0	0	0	0	0	0	100	0	0	0
71226	2011-10-28 04:59:59	2	-23.012	35.591	0	0	0	0	0	0	0	0	100	0	0	0
71226	2011-10-28 06:00:00	2	-23.012	35.591	0	0	0	0	0	0	0	31	69	0	0	0
71226	2011-10-28 10:59:59	2	-23.012	35.591	0	0	0	0	0	0	0	0	100	0	0	0
71226	2011-10-28 16:59:59	3	-23.17	35.556	0	0	0	0	0	0	0	0	100	0	0	0
71226	2011-10-28 18:00:00	3	-23.17	35.556	0	0	0	0	0	0	0	9	91	0	0	0
71226	2011-10-28 22:59:59	2	-23.278	35.509	0	0	0	0	0	0	0	99	1	0	0	0
71226	2011-10-29 04:59:59	2	-23.388	35.487	0	0	0	0	0	0	0	100	0	0	0	0
71226	2011-10-29 06:00:00	2	-23.388	35.487	0	0	0	0	0	0	0	55	45	0	0	0
71226	2011-10-29 16:59:59	2	-23.887	35.549	0	0	0	0	0	0	0	100	0	0	0	0
71226	2011-10-29 18:00:00	2	-23.887	35.549	0	0	0	0	0	0	0	100	0	0	0	0
71226	2011-10-29 22:59:59	2	-23.887	35.549	0	0	0	0	0	0	0	100	0	0	0	0
71226	2011-10-30 04:59:59	2	-23.887	35.549	0	0	0	0	0	0	0	100	0	0	0	0
71226	2011-10-30 06:00:00	2	-23.887	35.549	0	0	0	0	0	0	0	100	0	0	0	0
71226	2011-10-30 16:59:59	1	-24.005	35.516	0	0	0	0	0	0	0	100	0	0	0	0
71226	2011-10-30 22:59:59				0	0	0	0	0	0	0	100	0	0	0	0
71226	2011-10-31 04:59:59				0	0	0	0	0	0	0	100	0	0	0	0
71226	2011-10-31 06:00:00				0	0	0	0	0	0	0	91	9	0	0	0
71226	2011-10-31 10:59:59	2	-23.405	35.481	0	0	0	0	0	0	0	100	0	0	0	0
71226	2011-10-31 16:59:59	2	-23.405	35.481	0	0	0	0	0	0	0	100	0	0	0	0
71226	2011-10-31 18:00:00	2	-23.405	35.481	0	0	0	0	0	0	0	100	0	0	0	0
71226	2011-10-31 22:59:59	2	-23.405	35.481	0	0	0	0	0	0	0	96	4	0	0	0
71226	2011-11-01 04:59:59	2	-23.405	35.481	0	0	0	0	0	0	0	100	0	0	0	0
71226	2011-11-01 06:00:00	2	-23.405	35.481	0	0	0	0	0	0	0	100	0	0	0	0
71226	2011-11-01 10:59:59	3	-23.372	35.48	0	0	0	0	0	0	0	100	0	0	0	0
71226	2011-11-01 16:59:59	2	-23.323	35.495	0	0	0	0	0	0	0	100	0	0	0	0
71226	2011-11-01 18:00:00	2	-23.323	35.495	0	0	0	0	0	0	0	100	0	0	0	0
71226	2011-11-01 22:59:59	1	-23.223	35.532	0	0	0	0	0	0	0	100	0	0	0	0
71226	2011-11-02 04:59:59	1	-23.206	35.531	0	0	0	0	0	0	0	100	0	0	0	0
71226	2011-11-02 06:00:00	1	-23.206	35.531	0	0	0	0	0	0	0	95	5	0	0	0
71226	2011-11-02 10:59:59	3	-23.19	35.532	0	0	0	0	0	0	0	98	2	0	0	0
71226	2011-11-02 16:59:59	3	-23.19	35.532	0	0	0	0	0	0	0	100	0	0	0	0
71226	2011-11-02 18:00:00	1	-23.125	35.542	0	0	0	0	0	0	0	100	0	0	0	0
71226	2011-11-02 22:59:59	1	-23.125	35.542	0	0	0	0	0	0	0	100	0	0	0	0
71226	2011-11-03 04:59:59	2	-23.251	35.532	0	0	0	0	0	0	0	100	0	0	0	0
71226	2011-11-03 06:00:00	2	-23.251	35.532	0	0	0	0	0	0	0	100	0	0	0	0
71226	2011-11-03 10:59:59	2	-23.251	35.532	0	0	0	0	0	0	0	100	0	0	0	0
71226	2011-11-03 16:59:59	1	-23.341	35.498	0	0	0	0	0	0	0	100	0	0	0	0
71226	2011-11-03 18:00:00	1	-23.341	35.498	0	0	0	0	0	0	0	100	0	0	0	0
71226	2011-11-03 22:59:59	2	-23.365	35.489	0	0	0	0	0	0	0	100	0	0	0	0
71226	2011-11-04 04:59:59	2	-23.365	35.489	0	0	0	0	0	0	0	100	0	0	0	0
71226	2011-11-04 16:59:59	3	-23.847	35.555	0	0	0	0	0	0	0	100	0	0	0	0
71226	2011-11-04 18:00:00	3	-23.847	35.555	0	0	0	0	0	0	4	96	0	0	0	0
71226	2011-11-04 22:59:59	3	-23.847	35.555	0	0	0	0	0	0	14	86	0	0	0	0
71226	2011-11-05 06:00:00	1	-23.849	35.556	0	0	0	0	0	0	7	93	0	0	0	0
71226	2011-11-06 04:59:59	2	-23.858	35.553	0	0	0	0	0	0	0	100	0	0	0	0
71226	2011-11-06 06:00:00	2	-23.858	35.553	0	0	0	0	0	0	0	73	27	0	0	0
DeployID	Ptt	Instr	HistType	Date	Time Offset	Count	BadTherm	LocationQuality	Latitude	Longitude	NumBins	Sum	-40 to 2 C	2.1 to 5 C	5.1 to 10 C	10.1 to 15.0 C	15.1 to 17.5	17.6 to20.0 C	20.1 to 22.0 C	22.1 to 25.0 C	25.1 to 27.0 C	27.1 to 29	29.1 to 31 C	31.1 to 60 C	Bin13	Bin14	Bin15	Bin16	Bin17	Bin18	Bin19	Bin20	Bin21	Bin22	Bin23	Bin24	Bin25	Bin26	Bin27	Bin28	Bin29	Bin30	Bin31	Bin32	Bin33	Bin34	Bin35	Bin36	Bin37
70810	70810	SPOT	TAT	2011-11-25 10:59:59		1		1	-23.894	35.569	12	100	0	0	0	0	0	0	0	100	0	0	0	0
70810	70810	SPOT	TAT	2011-11-25 18:00:00		1		1	-23.906	35.541	12	100	0	0	0	0	0	0	0	61	39	0	0	0
71229	71229	SPOT	TAT	2011-07-23 09:00:00		4		2	-23.931	35.534	12	100	0	0	0	0	0	0	0	94	6	0	0	0
71229	71229	SPOT	TAT	2011-07-23 10:59:59		2		2	-23.931	35.534	12	100	0	0	0	0	0	0	0	100	0	0	0	0
71229	71229	SPOT	TAT	2011-07-23 16:59:59		3		1	-23.973	35.513	12	100	0	0	0	0	0	0	0	100	0	0	0	0
71229	71229	SPOT	TAT	2011-07-23 18:00:00		2		1	-23.973	35.513	12	100	0	0	0	0	0	0	0	100	0	0	0	0
71229	71229	SPOT	TAT	2011-07-23 22:59:59		3		1	-23.973	35.513	12	100	0	0	0	0	0	0	0	100	0	0	0	0
71229	71229	SPOT	TAT	2011-07-24 04:59:59		3		3	-23.893	35.555	12	100	0	0	0	0	0	0	0	100	0	0	0	0
71229	71229	SPOT	TAT	2011-07-24 06:00:00		1		3	-23.893	35.555	12	100	0	0	0	0	0	0	0	100	0	0	0	0
71229	71229	SPOT	TAT	2011-07-24 10:59:59		1		1	-23.969	35.534	12	100	0	0	0	0	0	0	2	98	0	0	0	0
71229	71229	SPOT	TAT	2011-07-24 16:59:59		1		1	-23.958	35.518	12	100	0	0	0	0	0	0	6	94	0	0	0	0
71229	71229	SPOT	TAT	2011-07-24 18:00:00		3		1	-23.958	35.518	12	100	0	0	0	0	0	0	0	100	0	0	0	0
71229	71229	SPOT	TAT	2011-07-24 22:59:59		3		2	-23.89	35.544	12	100	0	0	0	0	0	0	0	100	0	0	0	0
71229	71229	SPOT	TAT	2011-07-25 04:59:59		3		2	-23.944	35.519	12	100	0	0	0	0	0	0	20	80	0	0	0	0
71229	71229	SPOT	TAT	2011-07-25 06:00:00		2		3	-23.995	35.501	12	100	0	0	0	0	0	0	4	96	0	0	0	0
71229	71229	SPOT	TAT	2011-07-25 10:59:59		3		3	-23.995	35.501	12	100	0	0	0	0	0	0	56	44	0	0	0	0
71229	71229	SPOT	TAT	2011-07-25 16:59:59		2		3	-23.995	35.501	12	100	0	0	0	0	0	0	100	0	0	0	0	0
71229	71229	SPOT	TAT	2011-07-25 18:00:00		6		3	-23.995	35.501	12	100	0	0	0	0	0	0	100	0	0	0	0	0
71229	71229	SPOT	TAT	2011-07-25 22:59:59		3		2	-24.248	35.433	12	100	0	0	0	0	0	0	100	0	0	0	0	0
71229	71229	SPOT	TAT	2011-07-26 04:59:59		4		2	-24.248	35.433	12	100	0	0	0	0	0	0	100	0	0	0	0	0
71229	71229	SPOT	TAT	2011-07-26 06:00:00		1		2	-24.248	35.433	12	100	0	0	0	0	0	0	98	2	0	0	0	0
71229	71229	SPOT	TAT	2011-07-26 10:59:59		1		2	-24.248	35.433	12	100	0	0	0	0	0	0	94	6	0	0	0	0
71229	71229	SPOT	TAT	2011-07-26 10:59:59		3		2	-24.248	35.433	12	100	0	0	0	0	0	0	94	6	0	0	0	0
71229	71229	SPOT	TAT	2011-07-26 16:59:59		3		2	-24.292	35.433	12	100	0	0	0	0	0	0	59	41	0	0	0	0
71229	71229	SPOT	TAT	2011-07-26 18:00:00		3		2	-24.292	35.433	12	100	0	0	0	0	0	0	54	46	0	0	0	0
71229	71229	SPOT	TAT	2011-07-26 22:59:59		1		2	-24.293	35.428	12	100	0	0	0	0	0	0	100	0	0	0	0	0
71229	71229	SPOT	TAT	2011-07-27 04:59:59		2		3	-24.182	35.49	12	100	0	0	0	0	0	0	74	26	0	0	0	0
71229	71229	SPOT	TAT	2011-07-27 06:00:00		2		3	-24.182	35.49	12	100	0	0	0	0	0	0	64	36	0	0	0	0
71229	71229	SPOT	TAT	2011-07-27 10:59:59		4		1	-24.168	35.493	12	100	0	0	0	0	0	0	39	61	0	0	0	0
71229	71229	SPOT	TAT	2011-07-27 16:59:59		2		1	-24.168	35.493	12	100	0	0	0	0	0	0	83	17	0	0	0	0
71229	71229	SPOT	TAT	2011-07-27 18:00:00		2		1	-24.168	35.493	12	100	0	0	0	0	0	0	97	3	0	0	0	0
71229	71229	SPOT	TAT	2011-07-27 22:59:59		2		3	-24.11	35.509	12	100	0	0	0	0	0	0	58	42	0	0	0	0
71229	71229	SPOT	TAT	2011-07-28 04:59:59		1		3	-24.11	35.509	12	100	0	0	0	0	0	0	91	9	0	0	0	0
71229	71229	SPOT	TAT	2011-07-28 06:00:00		1		1	-24.107	35.51	12	100	0	0	0	0	0	0	84	16	0	0	0	0
71229	71229	SPOT	TAT	2011-07-28 10:59:59		4		1	-24.107	35.51	12	100	0	0	0	0	0	0	43	57	0	0	0	0
71229	71229	SPOT	TAT	2011-07-28 16:59:59		2		1	-24.07	35.509	12	100	0	0	0	0	0	0	18	82	0	0	0	0
71229	71229	SPOT	TAT	2011-07-28 18:00:00		1		1	-24.07	35.509	12	100	0	0	0	0	0	0	0	100	0	0	0	0
71229	71229	SPOT	TAT	2011-07-28 22:59:59		1		2	-24.069	35.513	12	100	0	0	0	0	0	0	13	87	0	0	0	0
71229	71229	SPOT	TAT	2011-07-29 04:59:59		2		2	-23.95	35.544	12	100	0	0	0	0	0	0	100	0	0	0	0	0
71229	71229	SPOT	TAT	2011-07-29 06:00:00		2		2	-23.95	35.544	12	100	0	0	0	0	0	0	51	49	0	0	0	0
71229	71229	SPOT	TAT	2011-07-29 10:59:59		6		2	-23.95	35.544	12	100	0	0	0	0	0	0	23	77	0	0	0	0
71229	71229	SPOT	TAT	2011-07-29 16:59:59		5		2	-24.093	35.505	12	100	0	0	0	0	0	0	100	0	0	0	0	0
71229	71229	SPOT	TAT	2011-07-29 18:00:00		4		2	-24.093	35.505	12	100	0	0	0	0	0	0	71	29	0	0	0	0
71229	71229	SPOT	TAT	2011-07-29 22:59:59		1		2	-24.095	35.502	12	100	0	0	0	0	0	0	76	24	0	0	0	0
71229	71229	SPOT	TAT	2011-07-30 04:59:59		3		2	-24.09	35.529	12	100	0	0	0	0	0	0	34	66	0	0	0	0
71229	71229	SPOT	TAT	2011-07-30 06:00:00		2		3	-24.088	35.512	12	100	0	0	0	0	0	0	0	100	0	0	0	0
71229	71229	SPOT	TAT	2011-07-30 10:59:59		1		3	-24.054	35.498	12	100	0	0	0	0	0	0	7	93	0	0	0	0
71229	71229	SPOT	TAT	2011-07-30 16:59:59		1		3	-24.054	35.498	12	100	0	0	0	0	0	0	18	82	0	0	0	0
71229	71229	SPOT	TAT	2011-07-30 22:59:59		1		2	-23.943	35.544	12	100	0	0	0	0	0	0	0	100	0	0	0	0
71229	71229	SPOT	TAT	2011-07-31 04:59:59		2		1	-23.935	35.539	12	100	0	0	0	0	0	0	0	100	0	0	0	0
71229	71229	SPOT	TAT	2011-07-31 10:59:59		2		1	-23.935	35.539	12	100	0	0	0	0	0	0	0	100	0	0	0	0
71229	71229	SPOT	TAT	2011-07-31 16:59:59		1		2	-24.106	35.507	12	100	0	0	0	0	0	0	0	100	0	0	0	0
71229	71229	SPOT	TAT	2011-07-31 18:00:00		2		2	-24.106	35.507	12	100	0	0	0	0	0	0	0	100	0	0	0	0
71229	71229	SPOT	TAT	2011-08-02 04:59:59		1		2	-24.101	35.503	12	100	0	0	0	0	0	0	1	99	0	0	0	0
71229	71229	SPOT	TAT	2011-08-02 06:00:00		2					12	100	0	0	0	0	0	0	100	0	0	0	0	0
71229	71229	SPOT	TAT	2011-08-02 10:59:59		6		2	-24.168	35.481	12	100	0	0	0	0	0	0	0	100	0	0	0	0
71229	71229	SPOT	TAT	2011-08-02 16:59:59		6		2	-24.168	35.481	12	100	0	0	0	0	0	0	0	100	0	0	0	0
71229	71229	SPOT	TAT	2011-08-02 18:00:00		5		2	-24.168	35.481	12	100	0	0	0	0	0	0	0	100	0	0	0	0
71229	71229	SPOT	TAT	2011-08-02 22:59:59		6		2	-24.168	35.481	12	100	0	0	0	0	0	0	13	87	0	0	0	0
71229	71229	SPOT	TAT	2011-08-03 04:59:59		6		2	-24.168	35.481	12	100	0	0	0	0	0	0	0	100	0	0	0	0
71229	71229	SPOT	TAT	2011-08-03 06:00:00		4		2	-24.168	35.481	12	100	0	0	0	0	0	0	2	98	0	0	0	0
71229	71229	SPOT	TAT	2011-08-03 10:59:59		4		2	-24.178	35.488	12	100	0	0	0	0	0	0	0	100	0	0	0	0
71229	71229	SPOT	TAT	2011-08-03 16:59:59		2		2	-24.154	35.484	12	100	0	0	0	0	0	0	0	100	0	0	0	0
71229	71229	SPOT	TAT	2011-08-03 18:00:00		3		2	-24.154	35.484	12	100	0	0	0	0	0	0	0	100	0	0	0	0
71229	71229	SPOT	TAT	2011-08-03 22:59:59		3		2	-23.921	35.539	12	100	0	0	0	0	0	0	0	100	0	0	0	0
71229	71229	SPOT	TAT	2011-08-04 04:59:59		5		2	-23.921	35.539	12	100	0	0	0	0	0	0	0	100	0	0	0	0
71229	71229	SPOT	TAT	2011-08-04 06:00:00		4		2	-23.921	35.539	12	100	0	0	0	0	0	0	0	100	0	0	0	0
71229	71229	SPOT	TAT	2011-08-04 10:59:59		1		3	-23.947	35.547	12	100	0	0	0	0	0	0	0	100	0	0	0	0
71229	71229	SPOT	TAT	2011-08-04 16:59:59		1		1	-23.905	35.534	12	100	0	0	0	0	0	0	0	100	0	0	0	0
71229	71229	SPOT	TAT	2011-08-04 18:00:00		8		1	-23.905	35.534	12	100	0	0	0	0	0	0	0	100	0	0	0	0
71229	71229	SPOT	TAT	2011-08-04 22:59:59		5		1	-23.88	35.551	12	100	0	0	0	0	0	0	0	100	0	0	0	0
71229	71229	SPOT	TAT	2011-08-05 04:59:59		6		3	-23.919	35.538	12	100	0	0	0	0	0	0	0	100	0	0	0	0
71229	71229	SPOT	TAT	2011-08-05 06:00:00		5		3	-23.932	35.541	12	100	0	0	0	0	0	0	0	100	0	0	0	0
71229	71229	SPOT	TAT	2011-08-05 10:59:59		7		3	-23.953	35.54	12	100	0	0	0	0	0	0	0	100	0	0	0	0
71229	71229	SPOT	TAT	2011-08-05 16:59:59		3		3	-23.953	35.54	12	100	0	0	0	0	0	0	12	88	0	0	0	0
71229	71229	SPOT	TAT	2011-08-05 18:00:00		3		3	-23.953	35.54	12	100	0	0	0	0	0	0	0	100	0	0	0	0
71229	71229	SPOT	TAT	2011-08-05 22:59:59		3		1	-23.999	35.494	12	100	0	0	0	0	0	0	0	100	0	0	0	0
71229	71229	SPOT	TAT	2011-08-06 04:59:59		3		2	-23.997	35.512	12	100	0	0	0	0	0	0	0	100	0	0	0	0
71229	71229	SPOT	TAT	2011-08-06 06:00:00		3		3	-24.008	35.51	12	100	0	0	0	0	0	0	100	0	0	0	0	0
71229	71229	SPOT	TAT	2011-08-06 10:59:59		1		3	-23.953	35.514	12	100	0	0	0	0	0	0	0	100	0	0	0	0
71229	71229	SPOT	TAT	2011-08-06 16:59:59		2		3	-23.953	35.514	12	100	0	0	0	0	0	0	0	100	0	0	0	0
71229	71229	SPOT	TAT	2011-08-06 18:00:00		1		3	-23.953	35.514	12	100	0	0	0	0	0	0	3	97	0	0	0	0
71229	71229	SPOT	TAT	2011-08-06 22:59:59		1		3	-23.953	35.514	12	100	0	0	0	0	0	0	0	100	0	0	0	0
71229	71229	SPOT	TAT	2011-08-07 04:59:59		2		2	-24.167	35.479	12	100	0	0	0	0	0	0	0	100	0	0	0	0
71229	71229	SPOT	TAT	2011-08-07 06:00:00		2		2	-24.167	35.479	12	100	0	0	0	0	0	0	0	100	0	0	0	0
71229	71229	SPOT	TAT	2011-08-07 10:59:59		1		2	-24.167	35.479	12	100	0	0	0	0	0	0	0	100	0	0	0	0
71229	71229	SPOT	TAT	2011-08-07 18:00:00		1		2	-24.25	35.44	12	100	0	0	0	0	0	0	45	55	0	0	0	0
71229	71229	SPOT	TAT	2011-08-07 22:59:59		1		2	-24.25	35.44	12	100	0	0	0	0	0	0	61	39	0	0	0	0
71229	71229	SPOT	TAT	2011-08-08 10:59:59		2		1	-24.248	35.455	12	100	0	0	0	0	0	0	0	100	0	0	0	0
71229	71229	SPOT	TAT	2011-08-08 16:59:59		3		1	-24.248	35.455	12	100	0	0	0	0	0	0	0	100	0	0	0	0
71229	71229	SPOT	TAT	2011-08-08 18:00:00		3		1	-24.248	35.455	12	100	0	0	0	0	0	0	7	93	0	0	0	0
71229	71229	SPOT	TAT	2011-08-08 22:59:59		3		1	-24.248	35.455	12	100	0	0	0	0	0	0	0	100	0	0	0	0
71229	71229	SPOT	TAT	2011-08-09 04:59:59		1		1	-24.248	35.455	12	100	0	0	0	0	0	0	0	100	0	0	0	0
71229	71229	SPOT	TAT	2011-08-09 06:00:00		2		1	-24.248	35.455	12	100	0	0	0	0	0	0	2	98	0	0	0	0
71229	71229	SPOT	TAT	2011-08-09 10:59:59		6					12	100	0	0	0	0	0	0	0	100	0	0	0	0
71229	71229	SPOT	TAT	2011-08-09 16:59:59		3		2	-24.581	35.219	12	100	0	0	0	0	0	0	0	100	0	0	0	0
71229	71229	SPOT	TAT	2011-08-09 18:00:00		3		2	-24.581	35.219	12	100	0	0	0	0	0	0	0	100	0	0	0	0
71229	71229	SPOT	TAT	2011-08-09 22:59:59		6		2	-24.581	35.219	12	100	0	0	0	0	0	0	18	82	0	0	0	0
71229	71229	SPOT	TAT	2011-08-10 04:59:59		6		2	-24.581	35.219	12	100	0	0	0	0	0	0	100	0	0	0	0	0
71229	71229	SPOT	TAT	2011-08-10 06:00:00		8		2	-24.581	35.219	12	100	0	0	0	0	0	0	86	14	0	0	0	0
71229	71229	SPOT	TAT	2011-08-10 10:59:59		5		2	-24.581	35.219	12	100	0	0	0	0	0	0	5	95	0	0	0	0
71229	71229	SPOT	TAT	2011-08-10 16:59:59		6		2	-24.548	35.182	12	100	0	0	0	0	0	0	0	100	0	0	0	0
71229	71229	SPOT	TAT	2011-08-10 18:00:00		4		2	-24.528	35.202	12	100	0	0	0	0	0	0	0	100	0	0	0	0
71229	71229	SPOT	TAT	2011-08-10 22:59:59		2		3	-24.456	35.239	12	100	0	0	0	0	0	0	0	100	0	0	0	0
71229	71229	SPOT	TAT	2011-08-11 04:59:59		3		3	-24.342	35.343	12	100	0	0	0	0	0	0	0	100	0	0	0	0
71229	71229	SPOT	TAT	2011-08-11 06:00:00		1		3	-24.342	35.343	12	100	0	0	0	0	0	0	0	100	0	0	0	0
71229	71229	SPOT	TAT	2011-08-11 10:59:59		2		3	-24.274	35.4	12	100	0	0	0	0	0	0	0	100	0	0	0	0
71229	71229	SPOT	TAT	2011-08-11 16:59:59		2		3	-24.274	35.4	12	100	0	0	0	0	0	0	0	100	0	0	0	0
71229	71229	SPOT	TAT	2011-08-11 18:00:00		2		2	-24.06	35.505	12	100	0	0	0	0	0	0	5	95	0	0	0	0
71229	71229	SPOT	TAT	2011-08-11 22:59:59		2		2	-24.06	35.505	12	100	0	0	0	0	0	0	0	100	0	0	0	0
71229	71229	SPOT	TAT	2011-08-12 04:59:59		1		1	-23.989	35.505	12	100	0	0	0	0	0	0	0	100	0	0	0	0
71229	71229	SPOT	TAT	2011-08-13 16:59:59		1		2	-23.303	35.502	12	100	0	0	0	0	0	0	0	100	0	0	0	0
71229	71229	SPOT	TAT	2011-08-13 22:59:59		2		2	-23.303	35.502	12	100	0	0	0	0	0	0	0	100	0	0	0	0
71229	71229	SPOT	TAT	2011-08-14 04:59:59		3		2	-23.303	35.502	12	100	0	0	0	0	0	0	0	100	0	0	0	0
71229	71229	SPOT	TAT	2011-08-14 06:00:00		3		2	-23.303	35.502	12	100	0	0	0	0	0	0	0	100	0	0	0	0
71229	71229	SPOT	TAT	2011-08-14 10:59:59		5		2	-23.303	35.502	12	100	0	0	0	0	0	0	0	100	0	0	0	0
71229	71229	SPOT	TAT	2011-08-14 16:59:59		3		2	-23.303	35.502	12	100	0	0	0	0	0	0	0	100	0	0	0	0
71229	71229	SPOT	TAT	2011-08-14 18:00:00		5		2	-23.303	35.502	12	100	0	0	0	0	0	0	0	100	0	0	0	0
71229	71229	SPOT	TAT	2011-08-14 22:59:59		5		2	-22.971	35.598	12	100	0	0	0	0	0	0	0	100	0	0	0	0
71229	71229	SPOT	TAT	2011-08-15 04:59:59		6		2	-22.971	35.598	12	100	0	0	0	0	0	0	0	100	0	0	0	0
71229	71229	SPOT	TAT	2011-08-15 06:00:00		5		2	-22.971	35.598	12	100	0	0	0	0	0	0	0	100	0	0	0	0
71229	71229	SPOT	TAT	2011-08-15 10:59:59		8		2	-22.971	35.598	12	100	0	0	0	0	0	0	0	100	0	0	0	0
71229	71229	SPOT	TAT	2011-08-15 16:59:59		3		1	-22.802	35.54	12	100	0	0	0	0	0	0	0	100	0	0	0	0
71229	71229	SPOT	TAT	2011-08-15 18:00:00		4		1	-22.802	35.54	12	100	0	0	0	0	0	0	0	100	0	0	0	0
71229	71229	SPOT	TAT	2011-08-15 22:59:59		3		3	-22.779	35.541	12	100	0	0	0	0	0	0	0	100	0	0	0	0
71229	71229	SPOT	TAT	2011-08-16 04:59:59		7		3	-22.681	35.522	12	100	0	0	0	0	0	0	0	100	0	0	0	0
71229	71229	SPOT	TAT	2011-08-16 06:00:00		2		2	-22.663	35.516	12	100	0	0	0	0	0	0	0	100	0	0	0	0
71229	71229	SPOT	TAT	2011-08-16 10:59:59		3		2	-22.559	35.515	12	100	0	0	0	0	0	0	0	100	0	0	0	0
71229	71229	SPOT	TAT	2011-08-16 16:59:59		4		3	-22.385	35.551	12	100	0	0	0	0	0	0	0	100	0	0	0	0
71229	71229	SPOT	TAT	2011-08-16 18:00:00		1		1	-22.325	35.555	12	100	0	0	0	0	0	0	0	100	0	0	0	0
71229	71229	SPOT	TAT	2011-08-17 18:00:00		1		3	-22.075	35.539	12	100	0	0	0	0	0	0	0	100	0	0	0	0
71229	71229	SPOT	TAT	2011-08-17 22:59:59		1		3	-22.075	35.539	12	100	0	0	0	0	0	0	0	100	0	0	0	0
71229	71229	SPOT	TAT	2011-08-19 04:59:59		1		3	-22.458	35.576	12	100	0	0	0	0	0	0	0	100	0	0	0	0
71229	71229	SPOT	TAT	2011-08-19 06:00:00		1		3	-22.458	35.576	12	100	0	0	0	0	0	0	0	100	0	0	0	0
71229	71229	SPOT	TAT	2011-08-19 10:59:59		6		3	-22.458	35.576	12	100	0	0	0	0	0	0	0	100	0	0	0	0
71229	71229	SPOT	TAT	2011-08-19 16:59:59		9		3	-22.458	35.576	12	100	0	0	0	0	0	0	0	100	0	0	0	0
71229	71229	SPOT	TAT	2011-08-19 18:00:00		10		3	-22.458	35.576	12	100	0	0	0	0	0	0	0	100	0	0	0	0
71229	71229	SPOT	TAT	2011-08-19 22:59:59		7		3	-22.458	35.576	12	100	0	0	0	0	0	0	0	100	0	0	0	0
71229	71229	SPOT	TAT	2011-08-20 04:59:59		7		3	-22.972	35.6	12	100	0	0	0	0	0	0	0	100	0	0	0	0
71229	71229	SPOT	TAT	2011-08-20 06:00:00		10		3	-22.972	35.6	12	100	0	0	0	0	0	0	0	100	0	0	0	0
71229	71229	SPOT	TAT	2011-08-20 10:59:59		6		3	-22.972	35.6	12	100	0	0	0	0	0	0	0	100	0	0	0	0
71229	71229	SPOT	TAT	2011-08-20 16:59:59		8		3	-23.048	35.574	12	100	0	0	0	0	0	0	0	100	0	0	0	0
71229	71229	SPOT	TAT	2011-08-20 18:00:00		4		3	-23.048	35.574	12	100	0	0	0	0	0	0	0	100	0	0	0	0
71229	71229	SPOT	TAT	2011-08-20 22:59:59		6		1	-23.242	35.518	12	100	0	0	0	0	0	0	0	100	0	0	0	0
71229	71229	SPOT	TAT	2011-08-21 04:59:59		9		2	-23.369	35.484	12	100	0	0	0	0	0	0	0	100	0	0	0	0
71229	71229	SPOT	TAT	2011-08-21 06:00:00		8		2	-23.369	35.484	12	100	0	0	0	0	0	0	0	100	0	0	0	0
71229	71229	SPOT	TAT	2011-08-21 10:59:59		5		3	-23.5	35.482	12	100	0	0	0	0	0	0	0	100	0	0	0	0
71229	71229	SPOT	TAT	2011-08-21 16:59:59		4		2	-23.534	35.474	12	100	0	0	0	0	0	3	6	22	12	25	10	22
71229	71229	SPOT	TAT	2011-08-21 18:00:00		6		2	-23.534	35.474	12	100	0	0	0	0	0	0	0	100	0	0	0	0
71229	71229	SPOT	TAT	2011-08-21 22:59:59		5		2	-23.534	35.474	12	100	0	0	0	0	0	0	0	100	0	0	0	0
71229	71229	SPOT	TAT	2011-08-22 04:59:59		4		2	-23.999	35.51	12	100	0	0	0	0	0	0	0	100	0	0	0	0
71229	71229	SPOT	TAT	2011-08-22 06:00:00		7		2	-23.999	35.51	12	100	0	0	0	0	0	0	0	100	0	0	0	0
71229	71229	SPOT	TAT	2011-08-22 10:59:59		4		1	-24.007	35.508	12	100	0	0	0	0	0	0	0	100	0	0	0	0
71229	71229	SPOT	TAT	2011-08-22 16:59:59		6		3	-24.127	35.489	12	100	0	0	0	0	0	0	0	100	0	0	0	0
71229	71229	SPOT	TAT	2011-08-22 18:00:00		5		3	-24.127	35.489	12	100	0	0	0	0	0	0	44	56	0	0	0	0
71229	71229	SPOT	TAT	2011-08-22 22:59:59		1		1	-24.284	35.377	12	100	0	0	0	0	0	15	85	0	0	0	0	0
71229	71229	SPOT	TAT	2011-08-23 04:59:59		2		2	-24.393	35.294	12	100	0	0	0	0	0	3	97	0	0	0	0	0
71229	71229	SPOT	TAT	2011-08-23 06:00:00		1		2	-24.393	35.294	12	100	0	0	0	0	0	0	98	2	0	0	0	0
71229	71229	SPOT	TAT	2011-08-23 10:59:59		5		3	-24.508	35.23	12	100	0	0	0	0	0	0	100	0	0	0	0	0
71229	71229	SPOT	TAT	2011-08-23 16:59:59		7		3	-24.508	35.23	12	100	0	0	0	0	0	0	100	0	0	0	0	0
71229	71229	SPOT	TAT	2011-08-23 18:00:00		5		3	-24.601	35.177	12	100	0	0	0	0	0	0	100	0	0	0	0	0
71229	71229	SPOT	TAT	2011-08-23 22:59:59		5		3	-24.601	35.177	12	100	0	0	0	0	0	45	55	0	0	0	0	0
71229	71229	SPOT	TAT	2011-08-24 04:59:59		6		3	-24.601	35.177	12	100	0	0	0	0	0	75	25	0	0	0	0	0
71229	71229	SPOT	TAT	2011-08-24 06:00:00		5		2	-24.496	35.216	12	100	0	0	0	0	0	4	96	0	0	0	0	0
71229	71229	SPOT	TAT	2011-08-24 10:59:59		3		2	-24.496	35.216	12	100	0	0	0	0	0	20	80	0	0	0	0	0
71229	71229	SPOT	TAT	2011-08-24 16:59:59		5		3	-24.535	35.201	12	100	0	0	0	0	0	0	100	0	0	0	0	0
71229	71229	SPOT	TAT	2011-08-24 18:00:00		7		3	-24.524	35.207	12	100	0	0	0	0	0	0	100	0	0	0	0	0
71229	71229	SPOT	TAT	2011-08-25 04:59:59		1		3	-24.435	35.287	12	100	0	0	0	0	0	0	100	0	0	0	0	0
71229	71229	SPOT	TAT	2011-08-25 06:00:00		1		3	-24.435	35.287	12	100	0	0	0	0	0	0	100	0	0	0	0	0
71229	71229	SPOT	TAT	2011-08-25 10:59:59		1		3	-24.435	35.287	12	100	0	0	0	0	0	0	100	0	0	0	0	0
71229	71229	SPOT	TAT	2011-08-26 10:59:59		1		3	-24.482	35.229	12	100	0	0	0	0	0	0	46	54	0	0	0	0
71229	71229	SPOT	TAT	2011-08-26 16:59:59		2		3	-24.482	35.229	12	100	0	0	0	0	0	0	74	26	0	0	0	0
71229	71229	SPOT	TAT	2011-08-26 22:59:59		1					12	100	0	0	0	0	0	0	100	0	0	0	0	0
71229	71229	SPOT	TAT	2011-08-27 04:59:59		1					12	100	0	0	0	0	0	0	100	0	0	0	0	0
71229	71229	SPOT	TAT	2011-09-06 16:59:59		1					12	100	0	0	0	0	0	0	0	100	0	0	0	0
71229	71229	SPOT	TAT	2011-09-06 18:00:00		2					12	100	0	0	0	0	0	0	0	100	0	0	0	0
71229	71229	SPOT	TAT	2011-09-06 22:59:59		1					12	100	0	0	0	0	0	0	0	100	0	0	0	0
71229	71229	SPOT	TAT	2011-09-07 04:59:59		1					12	100	0	0	0	0	0	0	0	100	0	0	0	0
71229	71229	SPOT	TAT	2011-09-07 06:00:00		1					12	100	0	0	0	0	0	0	0	100	0	0	0	0
71229	71229	SPOT	TAT	2011-09-07 10:59:59		2					12	100	0	0	0	0	0	0	0	100	0	0	0	0
71229	71229	SPOT	TAT	2011-09-07 16:59:59		2					12	100	0	0	0	0	0	0	0	100	0	0	0	0
71229	71229	SPOT	TAT	2011-09-07 18:00:00		3		2	-26.976	32.889	12	100	0	0	0	0	0	0	0	100	0	0	0	0
71229	71229	SPOT	TAT	2011-09-07 22:59:59		1		2	-26.976	32.889	12	100	0	0	0	0	0	0	0	100	0	0	0	0
71229	71229	SPOT	TAT	2011-09-08 04:59:59		1		2	-26.976	32.889	12	100	0	0	0	0	0	0	0	100	0	0	0	0
71229	71229	SPOT	TAT	2011-09-08 06:00:00		2		2	-26.976	32.889	12	100	0	0	0	0	0	0	0	100	0	0	0	0
71229	71229	SPOT	TAT	2011-09-08 10:59:59		3		2	-26.976	32.889	12	100	0	0	0	0	0	0	7	93	0	0	0	0
71229	71229	SPOT	TAT	2011-09-08 16:59:59		1		2	-26.976	32.889	12	100	0	0	0	0	0	0	0	100	0	0	0	0
71229	71229	SPOT	TAT	2011-09-09 04:59:59		1		1	-27.003	32.904	12	100	0	0	0	0	0	0	2	98	0	0	0	0
71229	71229	SPOT	TAT	2011-09-11 10:59:59		1					12	100	0	0	0	0	0	0	0	100	0	0	0	0
71229	71229	SPOT	TAT	2011-10-11 16:59:59		1					12	100	41	0	0	0	59	0	0	0	0	0	0	0
71229	71229	SPOT	TAT	2011-10-12 10:59:59		8					12	100	0	0	0	0	0	0	80	20	0	0	0	0
71229	71229	SPOT	TAT	2011-10-12 16:59:59		8					12	100	0	0	0	0	0	0	100	0	0	0	0	0
71229	71229	SPOT	TAT	2011-10-12 18:00:00		14					12	100	0	0	0	0	0	3	97	0	0	0	0	0
71229	71229	SPOT	TAT	2011-10-12 22:59:59		19					12	100	0	0	0	0	0	7	93	0	0	0	0	0
71229	71229	SPOT	TAT	2011-10-13 04:59:59		20					12	100	0	0	0	0	0	100	0	0	0	0	0	0
71229	71229	SPOT	TAT	2011-10-13 06:00:00		29					12	100	0	0	0	0	0	84	16	0	0	0	0	0
71229	71229	SPOT	TAT	2011-10-13 10:59:59		35					12	100	0	0	0	0	0	0	100	0	0	0	0	0
71229	71229	SPOT	TAT	2011-10-13 16:59:59		36		1	-32.625	28.58	12	100	0	0	0	0	0	0	100	0	0	0	0	0
71229	71229	SPOT	TAT	2011-10-13 18:00:00		37		1	-32.625	28.58	12	100	0	0	0	0	74	6	20	0	0	0	0	0
71229	71229	SPOT	TAT	2011-10-13 22:59:59		41		1	-32.625	28.58	12	100	0	0	0	16	84	0	0	0	0	0	0	0
71229	71229	SPOT	TAT	2011-10-14 04:59:59		41		1	-32.625	28.58	12	100	0	0	0	71	29	0	0	0	0	0	0	0
71229	71229	SPOT	TAT	2011-10-14 06:00:00		46		1	-32.625	28.58	12	101	0	0	0	26	27	48	0	0	0	0	0	0
71229	71229	SPOT	TAT	2011-10-14 10:59:59		51		1	-32.625	28.58	12	100	0	0	0	0	98	2	0	0	0	0	0	0
71229	71229	SPOT	TAT	2011-10-14 16:59:59		54		3	-32.864	28.34	12	100	0	0	0	0	100	0	0	0	0	0	0	0
71229	71229	SPOT	TAT	2011-10-14 18:00:00		53		1	-32.889	28.29	12	100	0	0	0	0	100	0	0	0	0	0	0	0
71229	71229	SPOT	TAT	2011-10-14 22:59:59		57		2	-32.986	28.152	12	100	0	0	0	0	100	0	0	0	0	0	0	0
71229	71229	SPOT	TAT	2011-10-15 04:59:59		58		3	-33.106	28.023	12	100	0	0	0	0	100	0	0	0	0	0	0	0
71229	71229	SPOT	TAT	2011-10-15 06:00:00		56		3	-33.126	28.02	12	100	0	0	0	0	77	23	0	0	0	0	0	0
71229	71229	SPOT	TAT	2011-10-15 10:59:59		53		3	-33.213	27.979	12	100	0	0	0	0	90	10	0	0	0	0	0	0
71229	71229	SPOT	TAT	2011-10-15 16:59:59		47		3	-33.233	27.913	12	100	0	0	0	0	100	0	0	0	0	0	0	0
71229	71229	SPOT	TAT	2011-10-15 18:00:00		50		2	-33.241	27.895	12	100	0	0	0	0	100	0	0	0	0	0	0	0
71229	71229	SPOT	TAT	2011-10-15 22:59:59		44		3	-33.277	27.862	12	100	0	0	0	0	100	0	0	0	0	0	0	0
71229	71229	SPOT	TAT	2011-10-16 04:59:59		44		1	-33.305	27.787	12	100	0	0	0	0	100	0	0	0	0	0	0	0
71229	71229	SPOT	TAT	2011-10-16 06:00:00		53		3	-33.312	27.781	12	100	0	0	0	0	100	0	0	0	0	0	0	0
71229	71229	SPOT	TAT	2011-10-16 10:59:59		39		3	-33.306	27.767	12	100	0	0	0	0	100	0	0	0	0	0	0	0
71229	71229	SPOT	TAT	2011-10-16 16:59:59		36		2	-33.321	27.741	12	100	0	0	0	0	100	0	0	0	0	0	0	0
71229	71229	SPOT	TAT	2011-10-16 18:00:00		33		3	-33.327	27.73	12	100	0	0	0	0	100	0	0	0	0	0	0	0
71229	71229	SPOT	TAT	2011-10-16 22:59:59		29		3	-33.371	27.7	12	100	0	0	0	0	100	0	0	0	0	0	0	0
71229	71229	SPOT	TAT	2011-10-17 04:59:59		25		2	-33.42	27.601	12	100	0	0	0	0	100	0	0	0	0	0	0	0
71229	71229	SPOT	TAT	2011-10-17 06:00:00		18		2	-33.429	27.621	12	100	0	0	0	0	100	0	0	0	0	0	0	0
71229	71229	SPOT	TAT	2011-10-17 10:59:59		18		3	-33.521	27.505	12	100	0	0	0	0	100	0	0	0	0	0	0	0
71229	71229	SPOT	TAT	2011-10-17 16:59:59		19		3	-33.604	27.3	12	100	0	0	0	0	100	0	0	0	0	0	0	0
71229	71229	SPOT	TAT	2011-10-17 18:00:00		16		3	-33.634	27.254	12	100	0	0	0	0	100	0	0	0	0	0	0	0
71229	71229	SPOT	TAT	2011-10-17 22:59:59		10		3	-33.755	27.108	12	100	0	0	0	0	100	0	0	0	0	0	0	0
71229	71229	SPOT	TAT	2011-10-18 04:59:59		12		2	-33.918	26.913	12	100	0	0	0	0	100	0	0	0	0	0	0	0
71229	71229	SPOT	TAT	2011-10-18 06:00:00		13		2	-33.938	26.88	12	100	0	0	0	0	100	0	0	0	0	0	0	0
71229	71229	SPOT	TAT	2011-10-18 10:59:59		13		3	-34.057	26.725	12	100	0	0	0	0	100	0	0	0	0	0	0	0
71229	71229	SPOT	TAT	2011-10-18 16:59:59		13		3	-34.253	26.445	12	100	0	0	0	0	100	0	0	0	0	0	0	0
71229	71229	SPOT	TAT	2011-10-18 18:00:00		8		3	-34.256	26.441	12	100	0	0	0	0	100	0	0	0	0	0	0	0
71229	71229	SPOT	TAT	2011-10-18 22:59:59		3		3	-34.414	26.19	12	100	0	0	0	0	96	4	0	0	0	0	0	0
71229	71229	SPOT	TAT	2011-10-19 04:59:59		1		3	-34.504	25.925	12	100	0	0	0	0	59	41	0	0	0	0	0	0
71229	71229	SPOT	TAT	2011-10-19 06:00:00		1		2	-34.515	25.895	12	100	0	0	0	0	36	64	0	0	0	0	0	0
71229	71229	SPOT	TAT	2011-10-19 10:59:59		1		2	-34.535	25.801	12	100	0	0	0	0	69	31	0	0	0	0	0	0
71229	71229	SPOT	TAT	2011-10-19 16:59:59		1		2	-34.535	25.801	12	100	0	0	0	0	39	61	0	0	0	0	0	0
71229	71229	SPOT	TAT	2011-10-19 18:00:00		3		2	-34.535	25.801	12	100	0	0	0	0	77	23	0	0	0	0	0	0
71229	71229	SPOT	TAT	2011-10-19 22:59:59		3		2	-34.535	25.801	12	100	0	0	0	0	0	100	0	0	0	0	0	0
71229	71229	SPOT	TAT	2011-10-20 04:59:59		2		3	-34.576	25.581	12	100	0	0	0	0	0	100	0	0	0	0	0	0
71229	71229	SPOT	TAT	2011-10-20 06:00:00		4		3	-34.576	25.581	12	100	0	0	0	0	0	100	0	0	0	0	0	0
71229	71229	SPOT	TAT	2011-10-20 10:59:59		1		3	-34.576	25.581	12	100	0	0	0	0	0	100	0	0	0	0	0	0
71229	71229	SPOT	TAT	2011-10-20 16:59:59		2		3	-34.576	25.581	12	100	0	0	0	0	0	100	0	0	0	0	0	0
71229	71229	SPOT	TAT	2011-12-12 16:59:59		1					12	100	0	0	0	0	0	100	0	0	0	0	0	0
71229	71229	SPOT	TAT	2011-12-12 18:00:00		2					12	100	0	0	0	0	0	100	0	0	0	0	0	0
71229	71229	SPOT	TAT	2011-12-12 22:59:59		1					12	100	0	0	0	0	0	100	0	0	0	0	0	0
71229	71229	SPOT	TAT	2011-12-13 04:59:59		3					12	100	0	0	0	0	0	100	0	0	0	0	0	0
71229	71229	SPOT	TAT	2011-12-13 06:00:00		2					12	100	0	0	0	0	0	100	0	0	0	0	0	0
71229	71229	SPOT	TAT	2011-12-13 10:59:59		2					12	100	0	0	0	0	35	65	0	0	0	0	0	0
71229	71229	SPOT	TAT	2011-12-13 16:59:59		4					12	100	0	0	0	0	100	0	0	0	0	0	0	0
71229	71229	SPOT	TAT	2011-12-13 18:00:00		7					12	100	0	0	0	0	32	68	0	0	0	0	0	0
71229	71229	SPOT	TAT	2011-12-13 22:59:59		7					12	100	0	0	0	0	0	100	0	0	0	0	0	0
71229	71229	SPOT	TAT	2011-12-14 04:59:59		8					12	100	0	0	0	0	0	100	0	0	0	0	0	0
71229	71229	SPOT	TAT	2011-12-14 06:00:00		7					12	100	0	0	0	0	0	100	0	0	0	0	0	0
71229	71229	SPOT	TAT	2011-12-14 10:59:59		7					12	100	0	0	0	0	0	100	0	0	0	0	0	0
71229	71229	SPOT	TAT	2011-12-14 16:59:59		17		1	-34.849	20.173	12	100	0	0	0	0	0	100	0	0	0	0	0	0
71229	71229	SPOT	TAT	2011-12-14 18:00:00		15		1	-34.849	20.173	12	100	0	0	0	0	0	100	0	0	0	0	0	0
71229	71229	SPOT	TAT	2011-12-14 22:59:59		13		1	-34.849	20.173	12	100	0	0	0	0	0	100	0	0	0	0	0	0
71229	71229	SPOT	TAT	2011-12-15 04:59:59		12		1	-34.849	20.173	12	100	0	0	0	0	0	100	0	0	0	0	0	0
71229	71229	SPOT	TAT	2011-12-15 06:00:00		19		1	-34.849	20.173	12	100	0	0	0	0	0	100	0	0	0	0	0	0
71229	71229	SPOT	TAT	2011-12-15 10:59:59		23		1	-34.849	20.173	12	100	0	0	0	0	0	100	0	0	0	0	0	0
71229	71229	SPOT	TAT	2011-12-15 16:59:59		20		2	-34.828	20.201	12	100	0	0	0	0	0	100	0	0	0	0	0	0
71229	71229	SPOT	TAT	2011-12-15 18:00:00		19		2	-34.828	20.201	12	100	0	0	0	0	0	100	0	0	0	0	0	0
71229	71229	SPOT	TAT	2011-12-15 22:59:59		22		3	-34.797	20.218	12	100	0	0	0	0	0	100	0	0	0	0	0	0
71229	71229	SPOT	TAT	2011-12-16 04:59:59		18		3	-34.763	20.244	12	100	0	0	0	0	0	100	0	0	0	0	0	0
71229	71229	SPOT	TAT	2011-12-16 06:00:00		19		2	-34.77	20.248	12	100	0	0	0	0	0	41	59	0	0	0	0	0
71229	71229	SPOT	TAT	2011-12-16 10:59:59		15		3	-34.743	20.237	12	100	0	0	0	0	0	18	82	0	0	0	0	0
71229	71229	SPOT	TAT	2011-12-16 16:59:59		15		2	-34.713	20.246	12	100	0	0	0	0	0	100	0	0	0	0	0	0
71229	71229	SPOT	TAT	2011-12-16 18:00:00		21		3	-34.708	20.242	12	100	0	0	0	0	0	100	0	0	0	0	0	0
71229	71229	SPOT	TAT	2011-12-16 22:59:59		22		1	-34.711	20.233	12	100	0	0	0	0	0	100	0	0	0	0	0	0
71229	71229	SPOT	TAT	2011-12-17 04:59:59		18		3	-34.753	20.126	12	100	0	0	0	0	0	100	0	0	0	0	0	0
71229	71229	SPOT	TAT	2011-12-17 06:00:00		15		3	-34.753	20.126	12	100	0	0	0	0	0	37	63	0	0	0	0	0
71229	71229	SPOT	TAT	2011-12-17 10:59:59		15		3	-34.779	20.095	12	100	0	0	0	0	0	0	100	0	0	0	0	0
71229	71229	SPOT	TAT	2011-12-17 16:59:59		10		3	-34.794	20.1	12	100	0	0	0	0	0	0	100	0	0	0	0	0
71229	71229	SPOT	TAT	2011-12-17 18:00:00		10		3	-34.794	20.101	12	100	0	0	0	0	0	77	23	0	0	0	0	0
71229	71229	SPOT	TAT	2011-12-17 22:59:59		6		2	-34.832	20.101	12	100	0	0	0	0	0	100	0	0	0	0	0	0
71229	71229	SPOT	TAT	2011-12-18 04:59:59		3		3	-34.862	20.099	12	100	0	0	0	0	0	100	0	0	0	0	0	0
71229	71229	SPOT	TAT	2011-12-18 06:00:00		4		3	-34.862	20.099	12	100	0	0	0	0	0	13	87	0	0	0	0	0
71229	71229	SPOT	TAT	2011-12-18 10:59:59		2		3	-34.868	19.967	12	100	0	0	0	0	0	0	100	0	0	0	0	0
71229	71229	SPOT	TAT	2011-12-18 16:59:59		4		3	-34.872	19.962	12	100	0	0	0	0	0	0	100	0	0	0	0	0
71229	71229	SPOT	TAT	2011-12-18 18:00:00		2		3	-34.872	19.962	12	100	0	0	0	0	0	11	89	0	0	0	0	0
71229	71229	SPOT	TAT	2011-12-18 22:59:59		2		1	-34.869	19.932	12	100	0	0	0	0	0	100	0	0	0	0	0	0
71229	71229	SPOT	TAT	2011-12-19 04:59:59		7		1	-34.869	19.932	12	100	0	0	0	0	0	100	0	0	0	0	0	0
71229	71229	SPOT	TAT	2011-12-19 06:00:00		2		1	-34.869	19.932	12	100	0	0	0	0	0	87	13	0	0	0	0	0
71229	71229	SPOT	TAT	2011-12-19 10:59:59		4		1	-34.869	19.932	12	100	0	0	0	0	0	100	0	0	0	0	0	0
71229	71229	SPOT	TAT	2011-12-19 16:59:59		3		2	-34.809	20.057	12	100	0	0	0	0	0	100	0	0	0	0	0	0
71229	71229	SPOT	TAT	2011-12-19 18:00:00		4		2	-34.809	20.057	12	100	0	0	0	0	0	100	0	0	0	0	0	0
71229	71229	SPOT	TAT	2011-12-19 22:59:59		3		2	-34.809	20.057	12	100	0	0	0	0	0	100	0	0	0	0	0	0
71229	71229	SPOT	TAT	2011-12-20 04:59:59		3		2	-34.809	20.057	12	100	0	0	0	0	0	10	23	67	0	0	0	0
71229	71229	SPOT	TAT	2011-12-20 06:00:00		1		2	-34.81	20.065	12	100	0	0	0	0	0	0	0	34	43	23	0	0
71229	71229	SPOT	TAT	2011-12-20 10:59:59		2		2	-34.81	20.065	12	100	0	0	0	0	0	0	0	44	33	22	1	0
71229	71229	SPOT	TAT	2011-12-20 16:59:59		2		3	-34.807	20.05	12	100	0	0	0	0	0	0	0	41	59	0	0	0
71229	71229	SPOT	TAT	2011-12-20 18:00:00		2		3	-34.807	20.05	12	100	0	0	0	0	0	0	0	100	0	0	0	0
71229	71229	SPOT	TAT	2011-12-20 22:59:59		1		3	-34.807	20.05	12	100	0	0	0	0	0	0	57	43	0	0	0	0
71229	71229	SPOT	TAT	2011-12-21 04:59:59		6		3	-34.808	20.049	12	100	0	0	0	0	0	0	0	100	0	0	0	0
71229	71229	SPOT	TAT	2011-12-21 06:00:00		7		3	-34.808	20.05	12	100	0	0	0	0	0	0	0	100	0	0	0	0
71229	71229	SPOT	TAT	2011-12-21 10:59:59		5		3	-34.808	20.053	12	100	0	0	0	0	0	0	0	56	44	0	0	0
71229	71229	SPOT	TAT	2011-12-21 16:59:59		9		3	-34.808	20.049	12	100	0	0	0	0	0	0	0	100	0	0	0	0
71229	71229	SPOT	TAT	2011-12-21 18:00:00		7		2	-34.807	20.053	12	100	0	0	0	0	0	0	0	100	0	0	0	0
71229	71229	SPOT	TAT	2011-12-21 22:59:59		9		3	-34.808	20.051	12	100	0	0	0	0	0	0	34	66	0	0	0	0
71229	71229	SPOT	TAT	2011-12-22 04:59:59		10		3	-34.808	20.053	12	100	0	0	0	0	0	0	0	100	0	0	0	0
71229	71229	SPOT	TAT	2011-12-22 06:00:00		11		3	-34.808	20.053	12	100	0	0	0	0	0	0	0	100	0	0	0	0
71229	71229	SPOT	TAT	2011-12-22 10:59:59		7		3	-34.807	20.052	12	100	0	0	0	0	0	0	0	100	0	0	0	0
71229	71229	SPOT	TAT	2011-12-22 16:59:59		7		2	-34.806	20.051	12	100	0	0	0	0	0	0	0	100	0	0	0	0
71229	71229	SPOT	TAT	2011-12-22 18:00:00		8		2	-34.806	20.051	12	100	0	0	0	0	0	0	0	100	0	0	0	0
71229	71229	SPOT	TAT	2011-12-22 22:59:59		7		3	-34.807	20.052	12	100	0	0	0	0	0	0	90	10	0	0	0	0
71229	71229	SPOT	TAT	2011-12-23 04:59:59		7		3	-34.808	20.052	12	100	0	0	0	0	0	0	100	0	0	0	0	0
71229	71229	SPOT	TAT	2011-12-23 06:00:00		13		3	-34.808	20.052	12	100	0	0	0	0	0	0	13	87	0	0	0	0
71229	71229	SPOT	TAT	2011-12-23 10:59:59		9		1	-34.805	20.057	12	100	0	0	0	0	0	0	7	64	29	0	0	0
71229	71229	SPOT	TAT	2011-12-23 16:59:59		9		3	-34.808	20.051	12	100	0	0	0	0	0	0	0	100	0	0	0	0
71229	71229	SPOT	TAT	2011-12-23 18:00:00		4		3	-34.808	20.051	12	100	0	0	0	0	0	0	22	78	0	0	0	0
71229	71229	SPOT	TAT	2011-12-23 22:59:59		9		3	-34.807	20.049	12	100	0	0	0	0	0	0	100	0	0	0	0	0
71229	71229	SPOT	TAT	2011-12-24 04:59:59		6		3	-34.805	20.051	12	100	0	0	0	0	0	0	62	38	0	0	0	0
71229	71229	SPOT	TAT	2011-12-24 06:00:00		13		3	-34.807	20.05	12	100	0	0	0	0	0	0	0	100	0	0	0	0
71229	71229	SPOT	TAT	2011-12-24 10:59:59		8		3	-34.808	20.05	12	100	0	0	0	0	0	0	0	100	0	0	0	0
71229	71229	SPOT	TAT	2011-12-24 16:59:59		7		2	-34.809	20.05	12	100	0	0	0	0	0	0	0	100	0	0	0	0
71229	71229	SPOT	TAT	2011-12-24 18:00:00		7		2	-34.809	20.05	12	100	0	0	0	0	0	0	0	100	0	0	0	0
71229	71229	SPOT	TAT	2011-12-24 22:59:59		9		3	-34.808	20.05	12	100	0	0	0	0	0	0	35	65	0	0	0	0
71229	71229	SPOT	TAT	2011-12-25 04:59:59		9		3	-34.808	20.051	12	100	0	0	0	0	0	0	34	66	0	0	0	0
71229	71229	SPOT	TAT	2011-12-25 06:00:00		8		3	-34.808	20.051	12	100	0	0	0	0	0	0	100	0	0	0	0	0
71229	71229	SPOT	TAT	2011-12-25 10:59:59		8		3	-34.808	20.05	12	100	0	0	0	0	0	0	0	100	0	0	0	0
71229	71229	SPOT	TAT	2011-12-25 16:59:59		7		3	-34.808	20.05	12	100	0	0	0	0	0	0	0	100	0	0	0	0
71229	71229	SPOT	TAT	2011-12-25 18:00:00		10		3	-34.808	20.051	12	100	0	0	0	0	0	0	0	100	0	0	0	0
71229	71229	SPOT	TAT	2011-12-25 22:59:59		8		3	-34.807	20.052	12	100	0	0	0	0	0	0	0	100	0	0	0	0
71229	71229	SPOT	TAT	2011-12-26 04:59:59		6		3	-34.808	20.048	12	100	0	0	0	0	0	0	34	66	0	0	0	0
71229	71229	SPOT	TAT	2011-12-26 06:00:00		11		3	-34.806	20.049	12	100	0	0	0	0	0	0	6	94	0	0	0	0
71229	71229	SPOT	TAT	2011-12-26 10:59:59		14		3	-34.806	20.049	12	100	0	0	0	0	0	0	0	78	22	0	0	0
71229	71229	SPOT	TAT	2011-12-26 16:59:59		19		3	-34.809	20.052	12	100	0	0	0	0	0	0	0	100	0	0	0	0
71229	71229	SPOT	TAT	2011-12-26 18:00:00		13		3	-34.809	20.052	12	100	0	0	0	0	0	0	0	100	0	0	0	0
71229	71229	SPOT	TAT	2011-12-26 22:59:59		14		2	-34.809	20.051	12	100	0	0	0	0	0	0	0	100	0	0	0	0
71229	71229	SPOT	TAT	2011-12-27 04:59:59		13		3	-34.809	20.054	12	100	0	0	0	0	0	0	0	100	0	0	0	0
71229	71229	SPOT	TAT	2011-12-27 06:00:00		16		3	-34.809	20.054	12	100	0	0	0	0	0	0	0	88	12	0	0	0
71229	71229	SPOT	TAT	2011-12-27 10:59:59		15		3	-34.808	20.049	12	100	0	0	0	0	0	0	0	0	100	0	0	0
71229	71229	SPOT	TAT	2011-12-27 16:59:59		12		3	-34.807	20.052	12	100	0	0	0	0	0	0	0	0	100	0	0	0
71229	71229	SPOT	TAT	2011-12-27 18:00:00		11		3	-34.808	20.049	12	100	0	0	0	0	0	0	0	96	4	0	0	0
71229	71229	SPOT	TAT	2011-12-27 22:59:59		13		3	-34.807	20.049	12	100	0	0	0	0	0	0	0	100	0	0	0	0
71229	71229	SPOT	TAT	2011-12-28 04:59:59		9		3	-34.809	20.052	12	100	0	0	0	0	0	0	0	100	0	0	0	0
71229	71229	SPOT	TAT	2011-12-28 06:00:00		10		3	-34.809	20.052	12	100	0	0	0	0	0	0	0	57	43	0	0	0
71229	71229	SPOT	TAT	2011-12-28 10:59:59		11		3	-34.809	20.047	12	100	0	0	0	0	0	0	0	44	56	0	0	0
71229	71229	SPOT	TAT	2011-12-28 16:59:59		10		3	-34.807	20.049	12	100	0	0	0	0	0	0	0	100	0	0	0	0
71229	71229	SPOT	TAT	2011-12-28 18:00:00		13		3	-34.807	20.049	12	100	0	0	0	0	0	0	0	100	0	0	0	0
71229	71229	SPOT	TAT	2011-12-28 22:59:59		5		3	-34.806	20.052	12	100	0	0	0	0	0	0	0	100	0	0	0	0
71229	71229	SPOT	TAT	2011-12-29 04:59:59		3		3	-34.808	20.052	12	100	0	0	0	0	0	0	0	100	0	0	0	0
71229	71229	SPOT	TAT	2011-12-29 06:00:00		3		3	-34.808	20.05	12	100	0	0	0	0	0	0	0	50	50	0	0	0
71229	71229	SPOT	TAT	2011-12-29 10:59:59		2		3	-34.808	20.047	12	100	0	0	0	0	0	0	0	71	29	0	0	0
71229	71229	SPOT	TAT	2011-12-29 16:59:59		1		3	-34.807	20.049	12	100	0	0	0	0	0	0	0	100	0	0	0	0
71229	71229	SPOT	TAT	2011-12-29 18:00:00		1		3	-34.807	20.049	12	100	0	0	0	0	0	0	0	100	0	0	0	0
71229	71229	SPOT	TAT	2011-12-29 22:59:59		4		3	-34.808	20.05	12	100	0	0	0	0	0	0	17	83	0	0	0	0
71229	71229	SPOT	TAT	2011-12-30 04:59:59		7		1	-34.807	20.046	12	100	0	0	0	0	0	0	0	100	0	0	0	0
71229	71229	SPOT	TAT	2011-12-30 06:00:00		8		1	-34.807	20.046	12	100	0	0	0	0	0	0	0	26	48	26	0	0
71229	71229	SPOT	TAT	2011-12-30 10:59:59		7		3	-34.808	20.053	12	100	0	0	0	0	0	0	0	2	87	11	0	0
71229	71229	SPOT	TAT	2011-12-30 16:59:59		5		3	-34.808	20.053	12	100	0	0	0	0	0	0	0	100	0	0	0	0
71229	71229	SPOT	TAT	2011-12-30 18:00:00		6		3	-34.808	20.05	12	100	0	0	0	0	0	0	0	100	0	0	0	0
71229	71229	SPOT	TAT	2011-12-30 22:59:59		6		3	-34.808	20.05	12	100	0	0	0	0	0	0	64	36	0	0	0	0
71229	71229	SPOT	TAT	2011-12-31 04:59:59		9		3	-34.808	20.05	12	100	0	0	0	0	0	0	100	0	0	0	0	0
71229	71229	SPOT	TAT	2011-12-31 06:00:00		5		3	-34.808	20.05	12	100	0	0	0	0	0	0	26	50	24	0	0	0
71229	71229	SPOT	TAT	2011-12-31 10:59:59		6		2	-34.81	20.051	12	100	0	0	0	0	0	0	0	0	100	0	0	0
71229	71229	SPOT	TAT	2011-12-31 16:59:59		5		2	-34.81	20.051	12	100	0	0	0	0	0	0	0	22	78	0	0	0
71229	71229	SPOT	TAT	2011-12-31 18:00:00		8		2	-34.81	20.051	12	100	0	0	0	0	0	0	0	100	0	0	0	0
71229	71229	SPOT	TAT	2011-12-31 22:59:59		8		2	-34.807	20.051	12	100	0	0	0	0	0	0	99	1	0	0	0	0
71229	71229	SPOT	TAT	2012-01-01 04:59:59		8		1	-34.809	20.054	12	100	0	0	0	0	0	0	100	0	0	0	0	0
71229	71229	SPOT	TAT	2012-01-01 06:00:00		6		1	-34.809	20.054	12	100	0	0	0	0	0	0	6	94	0	0	0	0
71229	71229	SPOT	TAT	2012-01-01 10:59:59		7		2	-34.806	20.05	12	100	0	0	0	0	0	0	0	27	73	0	0	0
71229	71229	SPOT	TAT	2012-01-01 16:59:59		6		2	-34.806	20.05	12	100	0	0	0	0	0	0	0	100	0	0	0	0
71229	71229	SPOT	TAT	2012-01-01 18:00:00		6		3	-34.807	20.049	12	100	0	0	0	0	0	0	0	100	0	0	0	0
71229	71229	SPOT	TAT	2012-01-01 22:59:59		5		3	-34.806	20.052	12	100	0	0	0	0	0	0	0	100	0	0	0	0
71229	71229	SPOT	TAT	2012-01-02 04:59:59		3		3	-34.809	20.048	12	100	0	0	0	0	0	0	0	100	0	0	0	0
71229	71229	SPOT	TAT	2012-01-02 06:00:00		3		3	-34.808	20.051	12	100	0	0	0	0	0	0	0	74	26	0	0	0
71229	71229	SPOT	TAT	2012-01-02 10:59:59		2		2	-34.806	20.053	12	100	0	0	0	0	0	0	0	0	69	31	0	0
71223	71223	SPOT	TAT	2011-02-02 10:00:00		2		1	-24.068	36.141	12	99	0	0	0	0	0	0	0	0	0	11	75	13
71223	71223	SPOT	TAT	2011-02-02 10:59:59		1		1	-24.068	36.141	12	101	0	0	0	2	7	8	7	12	12	53	0	0
71223	71223	SPOT	TAT	2011-02-02 16:59:59		2		1	-24.068	36.141	12	100	0	0	0	0	0	0	0	0	18	82	0	0
71223	71223	SPOT	TAT	2011-02-02 18:00:00		1		1	-24.068	36.141	12	100	0	0	20	6	1	1	1	9	28	34	0	0
71223	71223	SPOT	TAT	2011-02-02 22:59:59		2		1	-24.068	36.141	12	99	0	0	0	0	0	2	1	3	11	80	2	0
71223	71223	SPOT	TAT	2011-02-03 04:59:59		1		1	-24.059	36.14	12	99	0	0	0	0	0	0	0	0	5	54	40	0
71223	71223	SPOT	TAT	2011-02-03 06:00:00		1		1	-24.095	36.202	12	99	0	0	0	2	2	4	2	4	4	14	67	0
71223	71223	SPOT	TAT	2011-02-03 10:59:59		1		1	-24.095	36.202	12	101	0	0	0	0	0	0	0	2	5	23	71	0
71223	71223	SPOT	TAT	2011-02-03 16:59:59		1		2	-24.602	36.829	12	100	0	0	0	0	0	0	0	0	0	71	29	0
71223	71223	SPOT	TAT	2011-02-03 18:00:00		1		2	-24.602	36.829	12	100	0	0	0	0	0	0	0	0	0	55	45	0
71223	71223	SPOT	TAT	40578		3		2	-24.602	36.83	12	101	0	0	0	0	0	0	0	4	2	83	12	0
71223	71223	SPOT	TAT	40578.2		3		2	-24.645	36.88	12	100	0	0	0	0	0	0	0	0	0	0	100	0
71223	71223	SPOT	TAT	40578.5		1		1	-24.698	36.925	12	100	0	0	0	0	0	0	1	2	2	53	42	0
71223	71223	SPOT	TAT	40578.8		1		3	-25.076	37.761	12	100	0	0	0	0	0	0	0	0	0	100	0	0
71223	71223	SPOT	TAT	40579		1		3	-25.076	37.761	12	100	0	0	0	0	0	0	0	0	0	100	0	0
71223	71223	SPOT	TAT	40579.2		1		2	-25.085	37.82	12	100	0	0	0	0	0	0	0	0	0	100	0	0
71223	71223	SPOT	TAT	40579.2		6		1	-25.085	37.855	12	98	0	0	0	0	3	2	1	2	2	88	0	0
71223	71223	SPOT	TAT	40579.5		6		1	-25.105	37.9	12	100	0	0	0	0	0	0	0	0	0	100	0	0
71223	71223	SPOT	TAT	40579.7		7		2	-25.173	38.449	12	100	0	0	0	0	0	0	0	0	0	100	0	0
71223	71223	SPOT	TAT	40579.8		9		2	-25.173	38.449	12	100	0	0	0	0	0	0	0	0	0	100	0	0
71223	71223	SPOT	TAT	40580		3		2	-25.173	38.449	12	100	0	0	0	0	0	0	0	0	0	100	0	0
71223	71223	SPOT	TAT	40580.2		5		2	-25.136	38.538	12	100	0	0	0	0	0	0	0	0	0	100	0	0
71223	71223	SPOT	TAT	40580.2		2		2	-25.136	38.538	12	100	0	0	0	0	0	0	0	0	0	100	0	0
71223	71223	SPOT	TAT	40580.5		2		2	-25.136	38.538	12	100	0	0	0	0	0	0	0	0	0	100	0	0
71223	71223	SPOT	TAT	40580.7		2		2	-24.786	39.196	12	100	0	0	0	0	0	0	0	0	0	100	0	0
71223	71223	SPOT	TAT	40580.8		3		2	-24.786	39.196	12	100	0	0	0	0	0	0	0	0	0	100	0	0
71223	71223	SPOT	TAT	40581.2		4		3	-24.723	39.285	12	100	0	0	0	0	0	0	0	0	0	100	0	0
71223	71223	SPOT	TAT	40581.2		3		3	-24.723	39.285	12	100	0	0	0	0	0	0	0	0	0	100	0	0
71223	71223	SPOT	TAT	40581.5		4		3	-24.723	39.285	12	100	0	0	0	0	0	0	0	0	0	100	0	0
71223	71223	SPOT	TAT	40581.7		3		1	-24.268	39.629	12	100	0	0	0	0	0	0	0	0	0	100	0	0
71223	71223	SPOT	TAT	40581.8		4		1	-24.268	39.629	12	100	0	0	0	0	0	0	0	0	0	100	0	0
71223	71223	SPOT	TAT	40582		5		1	-24.268	39.629	12	100	0	0	0	0	0	0	0	0	0	100	0	0
71223	71223	SPOT	TAT	40582.2		7		1	-24.137	39.656	12	100	0	0	0	0	0	0	0	0	0	100	0	0
71223	71223	SPOT	TAT	40582.2		7		1	-24.137	39.656	12	100	0	0	0	0	0	0	0	0	0	100	0	0
71223	71223	SPOT	TAT	40582.5		8		1	-24.137	39.656	12	100	0	0	0	0	0	0	0	0	0	100	0	0
71223	71223	SPOT	TAT	40582.7		6		1	-23.508	39.644	12	100	0	0	0	0	0	0	0	0	0	100	0	0
71223	71223	SPOT	TAT	40582.8		9		1	-23.508	39.644	12	100	0	0	0	0	0	0	0	0	0	100	0	0
71223	71223	SPOT	TAT	40583		6		1	-23.508	39.644	12	100	0	0	0	0	0	0	0	0	0	100	0	0
71223	71223	SPOT	TAT	40583.2		6		2	-23.416	39.649	12	100	0	0	0	0	0	0	0	0	0	100	0	0
71223	71223	SPOT	TAT	40583.2		6		2	-23.416	39.649	12	100	0	0	0	0	0	0	0	0	0	96	4	0
71223	71223	SPOT	TAT	40583.5		6		2	-23.416	39.649	12	100	0	0	0	0	0	0	0	0	0	100	0	0
71223	71223	SPOT	TAT	40583.7		6		1	-22.744	39.481	12	100	0	0	0	0	0	0	0	0	0	100	0	0
71223	71223	SPOT	TAT	40583.8		4		1	-22.744	39.481	12	100	0	0	0	0	0	0	0	0	0	100	0	0
71223	71223	SPOT	TAT	40584		10		1	-22.744	39.481	12	100	0	0	0	0	0	0	0	0	0	100	0	0
71223	71223	SPOT	TAT	40584.2		11		1	-22.641	39.398	12	100	0	0	0	0	0	0	0	0	0	100	0	0
71223	71223	SPOT	TAT	40584.2		9		1	-22.641	39.398	12	100	0	0	0	0	0	0	0	0	0	100	0	0
71223	71223	SPOT	TAT	40584.5		10		1	-22.641	39.398	12	100	0	0	0	0	0	0	0	0	0	100	0	0
71223	71223	SPOT	TAT	40584.7		9		1	-22.265	39.05	12	100	0	0	0	0	0	0	0	0	0	100	0	0
71223	71223	SPOT	TAT	40584.8		8		1	-22.265	39.05	12	100	0	0	0	0	0	0	0	0	0	100	0	0
71223	71223	SPOT	TAT	40585		9		1	-22.265	39.05	12	100	0	0	0	0	0	0	0	0	0	100	0	0
71223	71223	SPOT	TAT	40585.2		9		2	-22.21	38.965	12	100	0	0	0	0	0	0	0	0	0	100	0	0
71223	71223	SPOT	TAT	40585.2		11		2	-22.21	38.965	12	100	0	0	0	0	0	0	0	0	0	100	0	0
71223	71223	SPOT	TAT	40585.5		11		2	-22.21	38.965	12	100	0	0	0	0	0	0	0	0	0	100	0	0
71223	71223	SPOT	TAT	40585.7		9		2	-22.046	38.4	12	100	0	0	0	0	0	0	0	0	0	100	0	0
71223	71223	SPOT	TAT	40585.8		10		2	-22.046	38.4	12	100	0	0	0	0	0	0	0	0	0	100	0	0
71223	71223	SPOT	TAT	40586		11		2	-22.046	38.4	12	100	0	0	0	0	0	0	0	0	0	100	0	0
71223	71223	SPOT	TAT	40586.2		7		2	-22.042	38.278	12	100	0	0	0	0	0	0	0	0	0	100	0	0
71223	71223	SPOT	TAT	40586.2		9		2	-22.042	38.278	12	100	0	0	0	0	0	0	0	0	0	100	0	0
71223	71223	SPOT	TAT	40586.5		7		2	-22.042	38.278	12	100	0	0	0	0	0	0	0	0	0	100	0	0
71223	71223	SPOT	TAT	40586.7		9		3	-22.146	37.628	12	100	0	0	0	0	0	0	0	0	0	100	0	0
71223	71223	SPOT	TAT	40586.8		9		3	-22.146	37.628	12	100	0	0	0	0	0	0	0	0	0	100	0	0
71223	71223	SPOT	TAT	40587		9		3	-22.146	37.628	12	100	0	0	0	0	0	0	0	0	0	100	0	0
71223	71223	SPOT	TAT	40587.2		7		3	-22.185	37.504	12	100	0	0	0	0	0	0	0	0	0	100	0	0
71223	71223	SPOT	TAT	40587.2		9		3	-22.185	37.504	12	100	0	0	0	0	0	0	0	0	0	100	0	0
71223	71223	SPOT	TAT	40587.5		7		3	-22.185	37.504	12	100	0	0	0	0	0	0	0	0	0	100	0	0
71223	71223	SPOT	TAT	40587.7		9		2	-22.611	36.871	12	100	0	0	0	0	0	0	0	0	0	100	0	0
71223	71223	SPOT	TAT	40587.8		9		2	-22.611	36.871	12	100	0	0	0	0	0	0	0	0	0	100	0	0
71223	71223	SPOT	TAT	40588		6		2	-22.611	36.871	12	100	0	0	0	0	0	0	0	0	0	100	0	0
71223	71223	SPOT	TAT	40588.2		8		3	-22.707	36.768	12	100	0	0	0	0	0	0	0	0	0	100	0	0
71223	71223	SPOT	TAT	40588.2		10		3	-22.707	36.768	12	100	0	0	0	0	0	0	0	0	0	100	0	0
71223	71223	SPOT	TAT	40588.5		9		3	-22.707	36.768	12	100	0	0	0	0	0	0	0	0	0	100	0	0
71223	71223	SPOT	TAT	40588.7		7		1	-23.411	36.383	12	100	0	0	0	0	0	0	0	0	0	100	0	0
71223	71223	SPOT	TAT	40588.8		7		1	-23.411	36.383	12	100	0	0	0	0	0	0	0	0	0	100	0	0
71223	71223	SPOT	TAT	40589		8		1	-23.411	36.383	12	100	0	0	0	0	0	0	0	0	0	100	0	0
71223	71223	SPOT	TAT	40589.2		6		2	-23.525	36.347	12	100	0	0	0	0	0	0	0	0	0	100	0	0
71223	71223	SPOT	TAT	40589.2		4		2	-23.525	36.347	12	100	0	0	0	0	0	0	0	0	0	100	0	0
71223	71223	SPOT	TAT	40589.5		5		2	-23.525	36.347	12	100	0	0	0	0	0	0	0	0	0	100	0	0
71223	71223	SPOT	TAT	40589.7		4		1	-24.206	36.38	12	100	0	0	0	0	0	0	0	0	0	100	0	0
71223	71223	SPOT	TAT	40589.8		4		1	-24.206	36.38	12	100	0	0	0	0	0	0	0	0	0	100	0	0
71223	71223	SPOT	TAT	40590		8		1	-24.206	36.38	12	100	0	0	0	0	0	0	0	0	0	100	0	0
71223	71223	SPOT	TAT	40590.2		8		1	-24.255	36.419	12	100	0	0	0	0	0	0	0	0	0	100	0	0
71223	71223	SPOT	TAT	40590.2		9		1	-24.255	36.419	12	100	0	0	0	0	0	0	0	0	0	100	0	0
71223	71223	SPOT	TAT	40590.5		8		1	-24.255	36.419	12	100	0	0	0	0	0	0	0	0	0	100	0	0
71223	71223	SPOT	TAT	40590.7		9		3	-24.733	36.768	12	100	0	0	0	0	0	0	0	0	0	100	0	0
71223	71223	SPOT	TAT	40590.8		7		3	-24.733	36.768	12	100	0	0	0	0	0	0	0	0	0	100	0	0
71223	71223	SPOT	TAT	40591		2		3	-24.733	36.768	12	100	0	0	0	0	0	0	0	0	0	100	0	0
71223	71223	SPOT	TAT	40591.2		4		2	-24.764	36.806	12	100	0	0	0	0	0	0	0	0	0	100	0	0
71223	71223	SPOT	TAT	40591.2		4		2	-24.764	36.806	12	100	0	0	0	0	0	0	0	0	0	100	0	0
71223	71223	SPOT	TAT	40591.5		3		2	-24.764	36.806	12	100	0	0	0	0	0	0	0	0	0	100	0	0
71223	71223	SPOT	TAT	40591.7		5		1	-25.03	37.31	12	100	0	0	0	0	0	0	0	0	0	100	0	0
71223	71223	SPOT	TAT	40591.8		5		1	-25.03	37.31	12	100	0	0	0	0	0	0	0	0	0	100	0	0
71219	71219	SPOT	TAT	2011-07-23 06:00:00		1		2	-23.928	35.541	12	100	0	0	0	0	0	0	0	100	0	0	0	0
71219	71219	SPOT	TAT	2011-07-23 10:59:59		3		2	-23.928	35.541	12	100	0	0	0	0	0	0	0	100	0	0	0	0
71219	71219	SPOT	TAT	2011-07-23 16:59:59		3					12	100	0	0	0	0	0	0	15	85	0	0	0	0
71219	71219	SPOT	TAT	2011-07-23 18:00:00		2					12	100	0	0	0	0	0	0	16	84	0	0	0	0
71219	71219	SPOT	TAT	2011-07-23 22:59:59		4					12	100	0	0	0	0	0	0	39	61	0	0	0	0
71219	71219	SPOT	TAT	2011-07-24 04:59:59		1					12	100	0	0	0	0	0	0	0	100	0	0	0	0
71219	71219	SPOT	TAT	2011-07-24 06:00:00		1					12	100	0	0	0	0	0	0	0	100	0	0	0	0
71219	71219	SPOT	TAT	2011-07-24 10:59:59		3		1	-23.921	35.542	12	100	0	0	0	0	0	0	17	83	0	0	0	0
71219	71219	SPOT	TAT	2011-07-24 16:59:59		1		1	-23.921	35.542	12	100	0	0	0	0	0	0	55	45	0	0	0	0
71219	71219	SPOT	TAT	2011-07-24 18:00:00		1		1	-23.921	35.542	12	100	0	0	0	0	0	0	70	30	0	0	0	0
71219	71219	SPOT	TAT	2011-07-24 22:59:59		3		1	-23.921	35.542	12	100	0	0	0	0	0	0	3	97	0	0	0	0
71219	71219	SPOT	TAT	2011-07-25 04:59:59		1		1	-23.921	35.542	12	100	0	0	0	0	0	0	0	100	0	0	0	0
71219	71219	SPOT	TAT	2011-07-25 06:00:00		1		1	-23.921	35.542	12	100	0	0	0	0	0	0	0	100	0	0	0	0
71219	71219	SPOT	TAT	2011-07-25 10:59:59		5		3	-23.941	35.53	12	100	0	0	0	0	0	0	14	86	0	0	0	0
71219	71219	SPOT	TAT	2011-07-25 16:59:59		6		3	-23.991	35.505	12	100	0	0	0	0	0	0	85	15	0	0	0	0
71219	71219	SPOT	TAT	2011-07-25 18:00:00		8		3	-23.991	35.505	12	100	0	0	0	0	0	0	26	74	0	0	0	0
71219	71219	SPOT	TAT	2011-07-25 22:59:59		3		1	-24.028	35.485	12	100	0	0	0	0	0	0	0	100	0	0	0	0
71219	71219	SPOT	TAT	2011-07-26 04:59:59		2		3	-24.082	35.503	12	100	0	0	0	0	0	0	0	100	0	0	0	0
71219	71219	SPOT	TAT	2011-07-26 06:00:00		1		3	-24.088	35.5	12	100	0	0	0	0	0	0	0	73	12	12	3	0
71219	71219	SPOT	TAT	2011-07-26 10:59:59		1		3	-24.085	35.498	12	100	0	0	0	0	0	0	0	58	13	6	21	2
71219	71219	SPOT	TAT	2011-07-26 16:59:59		2		2	-24.098	35.496	12	100	0	0	0	0	0	0	0	100	0	0	0	0
71219	71219	SPOT	TAT	2011-07-26 18:00:00		2		3	-24.1	35.495	12	100	0	0	0	0	0	0	88	12	0	0	0	0
71219	71219	SPOT	TAT	2011-07-26 22:59:59		1		2	-24.099	35.498	12	100	0	0	0	0	0	68	32	0	0	0	0	0
71219	71219	SPOT	TAT	2011-07-27 16:59:59		1		3	-24.099	35.498	12	100	0	0	0	0	0	100	0	0	0	0	0	0
71226	71226	SPOT	TAT	2011-08-26 04:59:59		2		2	-23.952	35.52	12	100	0	0	4	29	24	43	0	0	0	0	0	0
71226	71226	SPOT	TAT	2011-08-26 10:59:59		1		3	-23.834	35.537	12	100	0	0	0	0	0	0	0	100	0	0	0	0
71226	71226	SPOT	TAT	2011-08-26 16:59:59		1		3	-23.834	35.537	12	100	0	0	0	0	0	0	28	72	0	0	0	0
71226	71226	SPOT	TAT	2011-08-26 18:00:00		1		3	-23.834	35.537	12	100	0	0	0	0	0	0	0	100	0	0	0	0
71226	71226	SPOT	TAT	2011-08-27 04:59:59		2		3	-23.834	35.537	12	100	0	0	0	0	0	0	0	100	0	0	0	0
71226	71226	SPOT	TAT	2011-08-27 06:00:00		4		3	-23.834	35.537	12	100	0	0	0	0	0	0	0	100	0	0	0	0
71226	71226	SPOT	TAT	2011-08-27 10:59:59		2		3	-23.834	35.537	12	100	0	0	0	0	0	0	0	100	0	0	0	0
71226	71226	SPOT	TAT	2011-08-27 16:59:59		3		1	-23.958	35.519	12	100	0	0	0	0	0	0	0	100	0	0	0	0
71226	71226	SPOT	TAT	2011-08-27 18:00:00		2		1	-23.958	35.519	12	100	0	0	0	0	0	0	0	100	0	0	0	0
71226	71226	SPOT	TAT	2011-08-27 22:59:59		4		1	-23.958	35.519	12	100	0	0	0	0	0	0	0	100	0	0	0	0
71226	71226	SPOT	TAT	2011-08-28 04:59:59		7		1	-23.958	35.519	12	100	0	0	0	0	0	0	0	100	0	0	0	0
71226	71226	SPOT	TAT	2011-08-28 06:00:00		5		1	-24.184	35.484	12	100	0	0	0	0	0	0	0	100	0	0	0	0
71226	71226	SPOT	TAT	2011-08-28 10:59:59		6		1	-24.184	35.484	12	100	0	0	0	0	0	0	0	100	0	0	0	0
71226	71226	SPOT	TAT	2011-08-28 16:59:59		7		1	-24.184	35.484	12	100	0	0	0	0	0	0	0	100	0	0	0	0
71226	71226	SPOT	TAT	2011-08-28 18:00:00		6		1	-24.184	35.484	12	100	0	0	0	0	0	0	81	19	0	0	0	0
71226	71226	SPOT	TAT	2011-08-28 22:59:59		8		1	-24.264	35.405	12	100	0	0	0	0	0	0	7	93	0	0	0	0
71226	71226	SPOT	TAT	2011-08-29 04:59:59		9		3	-24.351	35.326	12	100	0	0	0	0	0	0	34	66	0	0	0	0
71226	71226	SPOT	TAT	2011-08-29 06:00:00		10		3	-24.351	35.326	12	100	0	0	0	0	0	0	0	100	0	0	0	0
71226	71226	SPOT	TAT	2011-08-29 10:59:59		6		2	-24.323	35.353	12	100	0	0	0	0	0	0	0	100	0	0	0	0
71226	71226	SPOT	TAT	2011-08-29 16:59:59		6		2	-24.323	35.353	12	100	0	0	0	0	0	0	0	100	0	0	0	0
71226	71226	SPOT	TAT	2011-08-29 18:00:00		3		2	-24.323	35.353	12	100	0	0	0	0	0	0	0	100	0	0	0	0
71226	71226	SPOT	TAT	2011-08-29 22:59:59		6		2	-24.204	35.441	12	100	0	0	0	0	0	0	0	100	0	0	0	0
71226	71226	SPOT	TAT	2011-08-30 04:59:59		8		2	-24.204	35.441	12	100	0	0	0	0	0	0	0	100	0	0	0	0
71226	71226	SPOT	TAT	2011-08-30 06:00:00		8		2	-24.204	35.441	12	100	0	0	0	0	0	0	0	100	0	0	0	0
71226	71226	SPOT	TAT	2011-08-30 10:59:59		6		2	-24.203	35.457	12	100	0	0	0	0	0	0	0	100	0	0	0	0
71226	71226	SPOT	TAT	2011-08-30 16:59:59		5		2	-24.182	35.46	12	100	0	0	0	0	0	0	0	100	0	0	0	0
71226	71226	SPOT	TAT	2011-08-30 18:00:00		4		2	-24.182	35.46	12	100	0	0	0	0	0	0	31	69	0	0	0	0
71226	71226	SPOT	TAT	2011-08-30 22:59:59		3		2	-24.368	35.318	12	100	0	0	0	0	0	0	37	63	0	0	0	0
71226	71226	SPOT	TAT	2011-08-31 04:59:59		3		1	-24.445	35.256	12	100	0	0	0	0	0	0	49	51	0	0	0	0
71226	71226	SPOT	TAT	2011-08-31 06:00:00		1		1	-24.473	35.228	12	100	0	0	0	0	0	0	1	99	0	0	0	0
71226	71226	SPOT	TAT	2011-08-31 10:59:59		4		2	-24.474	35.229	12	101	0	0	0	0	0	0	3	98	0	0	0	0
71226	71226	SPOT	TAT	2011-08-31 16:59:59		2		2	-24.474	35.229	12	100	0	0	0	0	0	0	0	100	0	0	0	0
71226	71226	SPOT	TAT	2011-08-31 18:00:00		2		2	-24.474	35.229	12	100	0	0	0	0	0	0	6	94	0	0	0	0
71226	71226	SPOT	TAT	2011-08-31 22:59:59		1		2	-24.419	35.274	12	100	0	0	0	0	0	0	89	11	0	0	0	0
71226	71226	SPOT	TAT	2011-09-01 04:59:59		2		2	-24.419	35.274	12	100	0	0	0	0	0	0	99	1	0	0	0	0
71226	71226	SPOT	TAT	2011-09-01 06:00:00		3		2	-24.419	35.274	12	100	0	0	0	0	0	0	42	58	0	0	0	0
71226	71226	SPOT	TAT	2011-09-01 10:59:59		3		3	-24.408	35.278	12	100	0	0	0	0	0	0	23	77	0	0	0	0
71226	71226	SPOT	TAT	2011-09-01 16:59:59		2		3	-24.408	35.278	12	100	0	0	0	0	0	0	0	100	0	0	0	0
71226	71226	SPOT	TAT	2011-09-01 18:00:00		2		3	-24.408	35.278	12	100	0	0	0	0	0	0	41	59	0	0	0	0
71226	71226	SPOT	TAT	2011-09-01 22:59:59		1		3	-24.408	35.278	12	101	0	0	0	0	0	0	3	98	0	0	0	0
71226	71226	SPOT	TAT	2011-09-02 04:59:59		5		3	-24.408	35.278	12	100	0	0	0	0	0	0	0	100	0	0	0	0
71226	71226	SPOT	TAT	2011-09-02 06:00:00		5		3	-24.408	35.278	12	100	0	0	0	0	0	0	0	100	0	0	0	0
71226	71226	SPOT	TAT	2011-09-02 10:59:59		1		3	-23.883	35.566	12	100	0	0	0	0	0	0	0	100	0	0	0	0
71226	71226	SPOT	TAT	2011-09-02 16:59:59		4		3	-23.883	35.566	12	100	0	0	0	0	0	0	0	100	0	0	0	0
71226	71226	SPOT	TAT	2011-09-02 18:00:00		7		3	-23.883	35.566	12	100	0	0	0	0	0	0	22	78	0	0	0	0
71226	71226	SPOT	TAT	2011-09-02 22:59:59		5		3	-23.883	35.566	12	100	0	0	0	0	0	0	40	60	0	0	0	0
71226	71226	SPOT	TAT	2011-09-03 04:59:59		4		3	-23.883	35.566	12	100	0	0	0	0	0	0	0	100	0	0	0	0
71226	71226	SPOT	TAT	2011-09-03 18:00:00		1		2	-23.764	35.531	12	100	0	0	0	0	0	0	0	100	0	0	0	0
71226	71226	SPOT	TAT	2011-09-03 22:59:59		1		2	-23.764	35.531	12	100	0	0	0	0	0	0	0	100	0	0	0	0
71226	71226	SPOT	TAT	2011-09-04 06:00:00		3		2	-23.764	35.531	12	100	0	0	0	0	0	0	0	100	0	0	0	0
71226	71226	SPOT	TAT	2011-09-04 10:59:59		2		2	-23.764	35.531	12	100	0	0	0	0	0	0	0	100	0	0	0	0
71226	71226	SPOT	TAT	2011-09-04 16:59:59		4					12	100	0	0	0	0	0	0	0	100	0	0	0	0
71226	71226	SPOT	TAT	2011-09-04 18:00:00		4					12	100	0	0	0	0	0	0	0	100	0	0	0	0
71226	71226	SPOT	TAT	2011-09-04 22:59:59		3					12	100	0	0	0	0	0	0	0	100	0	0	0	0
71226	71226	SPOT	TAT	2011-09-05 04:59:59		1		1	-23.199	35.524	12	100	0	0	0	0	0	0	0	100	0	0	0	0
71226	71226	SPOT	TAT	2011-09-05 06:00:00		3		1	-23.199	35.524	12	100	0	0	0	0	0	0	0	100	0	0	0	0
71226	71226	SPOT	TAT	2011-09-05 10:59:59		3		1	-23.199	35.524	12	100	0	0	0	0	0	0	0	100	0	0	0	0
71226	71226	SPOT	TAT	2011-09-05 16:59:59		5		1	-23.199	35.524	12	100	0	0	0	0	0	0	0	100	0	0	0	0
71226	71226	SPOT	TAT	2011-09-05 18:00:00		7		1	-23.199	35.524	12	100	0	0	0	0	0	4	15	81	0	0	0	0
71226	71226	SPOT	TAT	2011-09-05 22:59:59		3		1	-23.199	35.524	12	100	0	0	0	0	0	0	0	100	0	0	0	0
71226	71226	SPOT	TAT	2011-09-06 04:59:59		6		3	-23.231	35.511	12	100	0	0	0	0	0	0	0	100	0	0	0	0
71226	71226	SPOT	TAT	2011-09-06 06:00:00		7		1	-23.271	35.513	12	100	0	0	0	0	0	0	0	100	0	0	0	0
71226	71226	SPOT	TAT	2011-09-06 10:59:59		3		2	-23.379	35.474	12	100	0	0	0	0	0	0	0	100	0	0	0	0
71226	71226	SPOT	TAT	2011-09-06 16:59:59		4		3	-23.54	35.451	12	100	0	0	0	0	0	0	0	100	0	0	0	0
71226	71226	SPOT	TAT	2011-09-06 18:00:00		6		3	-23.54	35.451	12	100	0	0	0	0	0	0	0	100	0	0	0	0
71226	71226	SPOT	TAT	2011-09-06 22:59:59		2		1	-23.671	35.49	12	100	0	0	0	0	0	0	0	100	0	0	0	0
71226	71226	SPOT	TAT	2011-09-07 04:59:59		3		2	-23.76	35.478	12	100	0	0	0	0	0	0	0	100	0	0	0	0
71226	71226	SPOT	TAT	2011-09-07 10:59:59		2		2	-23.811	35.555	12	100	0	0	0	0	0	0	0	100	0	0	0	0
71226	71226	SPOT	TAT	2011-09-07 16:59:59		3		2	-23.811	35.555	12	100	0	0	0	0	0	0	0	100	0	0	0	0
71226	71226	SPOT	TAT	2011-09-07 18:00:00		1		1	-24.117	35.503	12	100	0	0	0	0	0	0	0	100	0	0	0	0
71226	71226	SPOT	TAT	2011-09-07 22:59:59		1		1	-24.117	35.503	12	100	0	0	0	0	0	0	7	93	0	0	0	0
71226	71226	SPOT	TAT	2011-09-08 04:59:59		4		1	-24.117	35.503	12	100	0	0	0	0	0	0	0	100	0	0	0	0
71226	71226	SPOT	TAT	2011-09-08 06:00:00		7		1	-24.252	35.433	12	100	0	0	0	0	0	0	0	100	0	0	0	0
71226	71226	SPOT	TAT	2011-09-08 10:59:59		4		1	-24.252	35.433	12	100	0	0	0	0	0	0	0	100	0	0	0	0
71226	71226	SPOT	TAT	2011-09-08 16:59:59		5		1	-24.252	35.433	12	100	0	0	0	0	0	0	0	100	0	0	0	0
71226	71226	SPOT	TAT	2011-09-08 18:00:00		5		1	-24.252	35.433	12	100	0	0	0	0	0	0	0	100	0	0	0	0
71226	71226	SPOT	TAT	2011-09-08 22:59:59		5		3	-24.318	35.366	12	100	0	0	0	0	0	0	0	100	0	0	0	0
71226	71226	SPOT	TAT	2011-09-09 04:59:59		6		2	-24.3	35.372	12	100	0	0	0	0	0	0	0	100	0	0	0	0
71226	71226	SPOT	TAT	2011-09-09 06:00:00		6		2	-24.3	35.372	12	100	0	0	0	0	0	0	0	100	0	0	0	0
71226	71226	SPOT	TAT	2011-09-09 10:59:59		7		3	-24.301	35.377	12	100	0	0	0	0	0	0	0	100	0	0	0	0
71226	71226	SPOT	TAT	2011-09-09 16:59:59		7		1	-24.382	35.341	12	100	0	0	0	0	0	0	0	100	0	0	0	0
71226	71226	SPOT	TAT	2011-09-09 18:00:00		6		1	-24.382	35.341	12	100	0	0	0	0	0	0	6	94	0	0	0	0
71226	71226	SPOT	TAT	2011-09-09 22:59:59		4		1	-24.382	35.341	12	100	0	0	0	0	0	0	75	25	0	0	0	0
71226	71226	SPOT	TAT	2011-09-10 04:59:59		4		3	-24.344	35.341	12	100	0	0	0	0	0	0	100	0	0	0	0	0
71226	71226	SPOT	TAT	2011-09-10 06:00:00		5		3	-24.344	35.341	12	100	0	0	0	0	0	0	4	96	0	0	0	0
71226	71226	SPOT	TAT	2011-09-10 10:59:59		4		3	-24.344	35.341	12	100	0	0	0	0	0	0	55	45	0	0	0	0
71226	71226	SPOT	TAT	2011-09-10 16:59:59		3		1	-24.398	35.295	12	100	0	0	0	0	0	0	100	0	0	0	0	0
71226	71226	SPOT	TAT	2011-09-10 18:00:00		3		1	-24.398	35.295	12	100	0	0	0	0	0	0	100	0	0	0	0	0
71226	71226	SPOT	TAT	2011-09-10 22:59:59		1		1	-24.398	35.295	12	100	0	0	0	0	0	0	100	0	0	0	0	0
71226	71226	SPOT	TAT	2011-09-11 04:59:59		1		3	-24.395	35.299	12	100	0	0	0	0	0	0	100	0	0	0	0	0
71226	71226	SPOT	TAT	2011-09-11 06:00:00		2		3	-24.395	35.299	12	100	0	0	0	0	0	0	22	78	0	0	0	0
71226	71226	SPOT	TAT	2011-09-11 10:59:59		3		3	-24.395	35.299	12	100	0	0	0	0	0	0	36	64	0	0	0	0
71226	71226	SPOT	TAT	2011-09-11 16:59:59		3		3	-24.395	35.299	12	100	0	0	0	0	0	0	0	100	0	0	0	0
71226	71226	SPOT	TAT	2011-09-11 18:00:00		3		3	-24.532	35.209	12	100	0	0	0	0	0	0	29	71	0	0	0	0
71226	71226	SPOT	TAT	2011-09-11 22:59:59		4		3	-24.532	35.209	12	100	0	0	0	0	0	0	84	16	0	0	0	0
71226	71226	SPOT	TAT	2011-09-12 04:59:59		5		3	-24.532	35.209	12	100	0	0	0	0	0	0	82	18	0	0	0	0
71226	71226	SPOT	TAT	2011-09-12 10:59:59		2		1	-24.571	35.191	12	100	0	0	0	0	0	0	99	1	0	0	0	0
71226	71226	SPOT	TAT	2011-09-12 16:59:59		1		2	-24.439	35.249	12	100	0	0	0	0	0	0	100	0	0	0	0	0
71226	71226	SPOT	TAT	2011-09-12 18:00:00		4		2	-24.439	35.249	12	100	0	0	0	0	0	0	100	0	0	0	0	0
71226	71226	SPOT	TAT	2011-09-12 22:59:59		3		2	-24.439	35.249	12	100	0	0	0	0	0	0	100	0	0	0	0	0
71226	71226	SPOT	TAT	2011-09-13 04:59:59		4		2	-24.203	35.453	12	100	0	0	0	0	0	0	100	0	0	0	0	0
71226	71226	SPOT	TAT	2011-09-13 06:00:00		4		2	-24.203	35.453	12	100	0	0	0	0	0	0	100	0	0	0	0	0
71226	71226	SPOT	TAT	2011-09-13 10:59:59		1		2	-24.203	35.453	12	100	0	0	0	0	0	0	98	2	0	0	0	0
71226	71226	SPOT	TAT	2011-09-13 16:59:59		1		2	-24.203	35.453	12	100	0	0	0	0	0	0	87	13	0	0	0	0
71226	71226	SPOT	TAT	2011-09-13 18:00:00		2		2	-24.261	35.412	12	100	0	0	0	0	0	0	100	0	0	0	0	0
71226	71226	SPOT	TAT	2011-09-13 22:59:59		5		3	-24.337	35.344	12	100	0	0	0	0	0	0	100	0	0	0	0	0
71226	71226	SPOT	TAT	2011-09-14 04:59:59		4		2	-24.394	35.288	12	100	0	0	0	0	0	0	100	0	0	0	0	0
71226	71226	SPOT	TAT	2011-09-14 06:00:00		1		2	-24.394	35.288	12	100	0	0	0	0	0	0	100	0	0	0	0	0
71226	71226	SPOT	TAT	2011-09-14 10:59:59		1		3	-24.374	35.311	12	100	0	0	0	0	0	0	100	0	0	0	0	0
71226	71226	SPOT	TAT	2011-09-14 16:59:59		3		3	-24.374	35.311	12	100	0	0	0	0	0	0	100	0	0	0	0	0
71226	71226	SPOT	TAT	2011-09-14 18:00:00		1		3	-24.374	35.311	12	100	0	0	0	0	0	0	100	0	0	0	0	0
71226	71226	SPOT	TAT	2011-09-14 22:59:59		3		3	-24.374	35.311	12	100	0	0	0	0	0	0	50	50	0	0	0	0
71226	71226	SPOT	TAT	2011-09-15 04:59:59		3		1	-23.919	35.547	12	100	0	0	0	0	4	76	20	0	0	0	0	0
71226	71226	SPOT	TAT	2011-09-15 06:00:00		2		1	-23.919	35.547	12	101	0	0	0	0	11	2	22	66	0	0	0	0
71226	71226	SPOT	TAT	2011-09-15 10:59:59		3		1	-23.919	35.547	12	100	0	0	0	0	0	0	0	100	0	0	0	0
71226	71226	SPOT	TAT	2011-09-15 16:59:59		2		1	-23.919	35.547	12	100	0	0	0	0	0	0	0	100	0	0	0	0
71226	71226	SPOT	TAT	2011-09-16 04:59:59		1		2	-24.047	35.505	12	100	0	0	0	0	0	0	100	0	0	0	0	0
71226	71226	SPOT	TAT	2011-09-16 06:00:00		1		2	-24.047	35.505	12	100	0	0	0	0	0	4	96	0	0	0	0	0
71226	71226	SPOT	TAT	2011-09-17 06:00:00		1					12	100	0	0	0	0	0	0	100	0	0	0	0	0
71226	71226	SPOT	TAT	2011-09-17 10:59:59		2					12	100	0	0	0	0	0	0	100	0	0	0	0	0
71226	71226	SPOT	TAT	2011-09-17 16:59:59		3					12	100	0	0	0	0	0	0	100	0	0	0	0	0
71226	71226	SPOT	TAT	2011-09-17 18:00:00		5					12	100	0	0	0	0	0	0	100	0	0	0	0	0
71226	71226	SPOT	TAT	2011-09-17 22:59:59		9					12	100	0	0	0	0	0	0	96	4	0	0	0	0
71226	71226	SPOT	TAT	2011-09-18 04:59:59		7					12	100	0	0	0	0	0	0	67	33	0	0	0	0
71226	71226	SPOT	TAT	2011-09-18 06:00:00		9					12	100	0	0	0	0	0	0	40	60	0	0	0	0
71226	71226	SPOT	TAT	2011-09-18 10:59:59		8		2	-23.929	35.534	12	100	0	0	0	0	0	0	54	46	0	0	0	0
71226	71226	SPOT	TAT	2011-09-18 16:59:59		6		2	-23.929	35.534	12	100	0	0	0	0	0	0	0	100	0	0	0	0
71226	71226	SPOT	TAT	2011-09-18 18:00:00		9		2	-23.929	35.534	12	100	0	0	0	0	0	0	44	56	0	0	0	0
71226	71226	SPOT	TAT	2011-09-18 22:59:59		11		2	-23.929	35.534	12	100	0	0	0	0	0	0	86	14	0	0	0	0
71226	71226	SPOT	TAT	2011-09-19 04:59:59		9		2	-23.929	35.534	12	100	0	0	0	0	0	0	36	64	0	0	0	0
71226	71226	SPOT	TAT	2011-09-19 06:00:00		10		2	-23.929	35.534	12	100	0	0	0	0	0	0	77	23	0	0	0	0
71226	71226	SPOT	TAT	2011-09-19 10:59:59		4		1	-23.948	35.515	12	100	0	0	0	0	0	0	56	44	0	0	0	0
71226	71226	SPOT	TAT	2011-09-19 16:59:59		8		1	-23.96	35.513	12	100	0	0	0	0	0	0	60	40	0	0	0	0
71226	71226	SPOT	TAT	2011-09-19 18:00:00		5		1	-23.96	35.513	12	100	0	0	0	0	0	0	12	88	0	0	0	0
71226	71226	SPOT	TAT	2011-09-19 22:59:59		1		3	-23.959	35.511	12	100	0	0	0	0	0	0	90	10	0	0	0	0
71226	71226	SPOT	TAT	2011-09-20 04:59:59		4		3	-23.961	35.512	12	100	0	0	0	0	0	0	0	100	0	0	0	0
71226	71226	SPOT	TAT	2011-09-20 06:00:00		4		3	-23.961	35.512	12	100	0	0	0	0	0	0	0	22	47	26	5	0
71226	71226	SPOT	TAT	2011-09-20 10:59:59		4		3	-23.962	35.51	12	101	0	0	0	0	0	0	0	5	34	32	30	0
71226	71226	SPOT	TAT	2011-09-20 16:59:59		6		3	-23.961	35.51	12	100	0	0	0	0	0	0	0	100	0	0	0	0
71226	71226	SPOT	TAT	2011-09-20 18:00:00		1		2	-23.963	35.509	12	100	0	0	0	0	0	0	0	100	0	0	0	0
71226	71226	SPOT	TAT	2011-09-20 22:59:59		1		3	-23.961	35.511	12	100	0	0	0	0	0	0	0	100	0	0	0	0
71226	71226	SPOT	TAT	2011-09-21 04:59:59		3		2	-23.961	35.513	12	100	0	0	0	0	0	0	0	99	1	0	0	0
71226	71226	SPOT	TAT	2011-09-21 06:00:00		2		2	-23.961	35.513	12	100	0	0	0	0	0	0	0	0	16	13	13	58
71226	71226	SPOT	TAT	2011-09-21 10:59:59		2		3	-23.962	35.512	12	100	0	0	0	0	0	0	0	0	8	26	17	49
71226	71226	SPOT	TAT	2011-09-21 18:00:00		3		2	-23.961	35.511	12	100	0	0	0	0	0	0	0	62	38	0	0	0
71226	71226	SPOT	TAT	2011-09-21 22:59:59		2		2	-23.961	35.511	12	100	0	0	0	0	0	0	0	100	0	0	0	0
71226	71226	SPOT	TAT	2011-09-22 04:59:59		6		2	-23.966	35.512	12	100	0	0	0	0	0	0	0	100	0	0	0	0
71226	71226	SPOT	TAT	2011-09-22 06:00:00		4		3	-23.961	35.512	12	99	0	0	0	0	0	0	0	9	8	42	32	8
71226	71226	SPOT	TAT	2011-09-22 10:59:59		3		1	-23.962	35.512	12	100	0	0	0	0	0	0	0	18	40	42	0	0
71226	71226	SPOT	TAT	2011-09-22 16:59:59		4		3	-23.935	35.496	12	100	0	0	0	0	0	0	0	100	0	0	0	0
71226	71226	SPOT	TAT	2011-09-22 18:00:00		2		3	-23.935	35.496	12	100	0	0	0	0	0	0	0	100	0	0	0	0
71226	71226	SPOT	TAT	2011-09-22 22:59:59		3		3	-23.935	35.496	12	100	0	0	0	0	0	0	0	100	0	0	0	0
71226	71226	SPOT	TAT	2011-09-23 06:00:00		2		3	-23.935	35.499	12	101	0	0	0	0	0	0	0	9	65	24	3	0
71226	71226	SPOT	TAT	2011-09-23 10:59:59		2		3	-23.935	35.499	12	99	0	0	0	0	0	0	0	26	29	44	0	0
71226	71226	SPOT	TAT	2011-09-23 16:59:59		1		3	-23.936	35.499	12	100	0	0	0	0	0	0	0	100	0	0	0	0
71226	71226	SPOT	TAT	2011-09-23 18:00:00		3		3	-23.936	35.499	12	100	0	0	0	0	0	0	0	100	0	0	0	0
71226	71226	SPOT	TAT	2011-09-23 22:59:59		1		3	-23.936	35.499	12	100	0	0	0	0	0	0	0	100	0	0	0	0
71226	71226	SPOT	TAT	2011-09-24 04:59:59		1		3	-23.935	35.497	12	100	0	0	0	0	0	0	0	100	0	0	0	0
71219	71219	SPOT	TAT	2011-08-11 07:00:00		1		3	-23.96	35.515	12	100	0	0	0	0	0	0	0	59	13	15	7	6
71219	71219	SPOT	TAT	2011-08-11 10:59:59		1		3	-23.96	35.515	12	100	0	0	0	0	0	0	0	100	0	0	0	0
71219	71219	SPOT	TAT	2011-08-12 04:59:59		1		3	-23.96	35.515	12	100	0	0	0	0	0	0	0	100	0	0	0	0
71219	71219	SPOT	TAT	2011-08-12 06:00:00		2		3	-23.96	35.515	12	100	0	0	0	0	0	0	0	100	0	0	0	0
71219	71219	SPOT	TAT	2011-08-13 10:59:59		1		2	-23.951	35.531	12	100	0	0	0	0	0	0	0	100	0	0	0	0
71219	71219	SPOT	TAT	2011-08-13 18:00:00		1		2	-23.951	35.531	12	100	0	0	0	0	0	0	0	100	0	0	0	0
71219	71219	SPOT	TAT	2011-08-13 22:59:59		1		2	-23.951	35.531	12	100	0	0	0	0	0	0	0	100	0	0	0	0
71219	71219	SPOT	TAT	2011-08-14 06:00:00		1		2	-23.951	35.531	12	100	0	0	0	0	0	0	0	100	0	0	0	0
71219	71219	SPOT	TAT	2011-08-14 10:59:59		1		2	-23.951	35.531	12	100	0	0	0	0	0	0	0	100	0	0	0	0
71219	71219	SPOT	TAT	2011-08-14 16:59:59		2		2	-23.951	35.531	12	100	0	0	0	0	0	0	0	100	0	0	0	0
71219	71219	SPOT	TAT	2011-08-16 10:59:59		1					12	100	0	0	0	0	0	0	92	8	0	0	0	0
71219	71219	SPOT	TAT	2011-08-16 18:00:00		2					12	100	0	0	0	0	0	0	100	0	0	0	0	0
71219	71219	SPOT	TAT	2011-08-17 18:00:00		2		2	-24.213	35.452	12	100	0	0	0	0	0	0	52	48	0	0	0	0
71219	71219	SPOT	TAT	2011-08-17 22:59:59		1		2	-24.213	35.452	12	100	0	0	0	0	0	0	63	37	0	0	0	0
71219	71219	SPOT	TAT	2011-08-18 04:59:59		1		2	-24.213	35.452	12	100	0	0	0	0	0	0	0	100	0	0	0	0
71219	71219	SPOT	TAT	2011-08-18 16:59:59		1		1	-24.199	35.46	12	100	0	0	0	0	0	0	0	100	0	0	0	0
71219	71219	SPOT	TAT	2011-08-18 18:00:00		1		1	-24.199	35.46	12	100	0	0	0	0	0	0	0	100	0	0	0	0
71219	71219	SPOT	TAT	2011-08-18 22:59:59		1		1	-24.199	35.46	12	100	0	0	0	0	0	0	0	100	0	0	0	0
71219	71219	SPOT	TAT	2011-08-19 06:00:00		2		1	-24.199	35.46	12	100	0	0	0	0	0	0	0	100	0	0	0	0
71219	71219	SPOT	TAT	2011-08-19 10:59:59		2		1	-24.199	35.46	12	100	0	0	0	0	0	0	0	100	0	0	0	0
71219	71219	SPOT	TAT	2011-08-19 16:59:59		2					12	100	0	0	0	0	0	0	0	100	0	0	0	0
71219	71219	SPOT	TAT	2011-08-19 18:00:00		2					12	100	0	0	0	0	0	0	0	100	0	0	0	0
71219	71219	SPOT	TAT	2011-08-19 22:59:59		2		3	-24.209	35.444	12	100	0	0	0	0	0	0	0	100	0	0	0	0
71219	71219	SPOT	TAT	2011-08-20 04:59:59		1		3	-24.209	35.444	12	100	0	0	0	0	0	0	0	100	0	0	0	0
71219	71219	SPOT	TAT	2011-08-20 06:00:00		2		3	-24.209	35.444	12	100	0	0	0	0	0	0	0	100	0	0	0	0
71219	71219	SPOT	TAT	2011-08-20 10:59:59		1		3	-24.209	35.444	12	100	0	0	0	0	0	0	0	100	0	0	0	0
71219	71219	SPOT	TAT	2011-08-20 16:59:59		2		3	-24.209	35.444	12	100	0	0	0	0	0	0	0	100	0	0	0	0
71219	71219	SPOT	TAT	2011-08-20 18:00:00		1		3	-24.209	35.444	12	100	0	0	0	0	0	0	0	100	0	0	0	0
71219	71219	SPOT	TAT	2011-08-20 22:59:59		1		2	-24.233	35.43	12	100	0	0	0	0	0	0	0	100	0	0	0	0
71219	71219	SPOT	TAT	2011-08-21 04:59:59		2		2	-24.233	35.43	12	100	0	0	0	0	0	0	0	100	0	0	0	0
71219	71219	SPOT	TAT	2011-08-21 06:00:00		1		2	-24.233	35.43	12	100	0	0	0	0	0	0	0	100	0	0	0	0
71219	71219	SPOT	TAT	2011-08-21 10:59:59		2		2	-24.233	35.43	12	100	0	0	0	0	0	0	0	100	0	0	0	0
71219	71219	SPOT	TAT	2011-08-21 16:59:59		1		2	-24.233	35.43	12	100	0	0	0	0	0	0	0	100	0	0	0	0
71219	71219	SPOT	TAT	2011-08-21 18:00:00		2		2	-24.233	35.43	12	100	0	0	0	0	0	0	0	100	0	0	0	0
71219	71219	SPOT	TAT	2011-08-21 22:59:59		3		1	-24.345	35.339	12	100	0	0	0	0	0	0	15	85	0	0	0	0
71219	71219	SPOT	TAT	2011-08-22 04:59:59		1		1	-24.345	35.339	12	100	0	0	0	0	0	0	83	17	0	0	0	0
71219	71219	SPOT	TAT	2011-08-22 06:00:00		5		1	-24.345	35.339	12	100	0	0	0	0	0	0	87	13	0	0	0	0
71219	71219	SPOT	TAT	2011-08-22 10:59:59		2		1	-24.345	35.339	12	100	0	0	0	0	0	0	20	80	0	0	0	0
71219	71219	SPOT	TAT	2011-08-22 16:59:59		2		1	-24.345	35.339	12	100	0	0	0	0	0	0	0	100	0	0	0	0
71219	71219	SPOT	TAT	2011-08-22 22:59:59		1		3	-24.344	35.335	12	100	0	0	0	0	0	21	74	5	0	0	0	0
71219	71219	SPOT	TAT	2011-08-23 04:59:59		1		2	-24.35	35.345	12	100	0	0	0	0	0	0	100	0	0	0	0	0
71219	71219	SPOT	TAT	2011-08-23 06:00:00		2		2	-24.35	35.345	12	100	0	0	0	0	0	0	32	68	0	0	0	0
71219	71219	SPOT	TAT	2011-08-23 10:59:59		2		2	-24.35	35.345	12	100	0	0	0	0	0	0	0	100	0	0	0	0
71219	71219	SPOT	TAT	2011-08-23 16:59:59		1		2	-24.35	35.345	12	100	0	0	0	0	0	0	0	100	0	0	0	0
71219	71219	SPOT	TAT	2011-08-23 18:00:00		2		2	-24.35	35.345	12	100	0	0	0	0	0	0	4	96	0	0	0	0
71219	71219	SPOT	TAT	2011-08-23 22:59:59		2		1	-23.959	35.512	12	100	0	0	0	0	0	0	4	96	0	0	0	0
71219	71219	SPOT	TAT	2011-08-24 16:59:59		1		1	-23.959	35.512	12	100	0	0	0	0	0	0	0	100	0	0	0	0
71219	71219	SPOT	TAT	2011-08-24 22:59:59		2		1	-23.959	35.512	12	100	0	0	0	0	0	0	0	100	0	0	0	0
71219	71219	SPOT	TAT	2011-08-25 04:59:59		1		1	-23.959	35.512	12	100	0	0	0	0	0	0	0	100	0	0	0	0
71219	71219	SPOT	TAT	2011-08-25 16:59:59		1		1	-23.959	35.512	12	100	0	0	0	0	0	0	0	100	0	0	0	0
71219	71219	SPOT	TAT	2011-08-30 16:59:59		1					12	100	0	0	0	0	0	0	0	100	0	0	0	0
71219	71219	SPOT	TAT	2011-08-30 18:00:00		1					12	100	0	0	0	0	0	0	0	100	0	0	0	0
71219	71219	SPOT	TAT	2011-08-30 22:59:59		1					12	100	0	0	0	0	0	0	0	100	0	0	0	0
71219	71219	SPOT	TAT	2011-09-05 06:00:00		1					12	100	0	0	0	0	0	0	0	100	0	0	0	0
71219	71219	SPOT	TAT	2011-09-05 10:59:59		1					12	100	0	0	0	0	0	0	0	100	0	0	0	0
71219	71219	SPOT	TAT	2011-09-05 18:00:00		1					12	100	0	0	0	0	0	0	2	98	0	0	0	0
71219	71219	SPOT	TAT	2011-09-05 22:59:59		2					12	100	0	0	0	0	0	0	0	100	0	0	0	0
71219	71219	SPOT	TAT	2011-09-06 04:59:59		1		1	-24.343	35.346	12	101	0	0	0	0	0	0	33	68	0	0	0	0
71219	71219	SPOT	TAT	2011-09-06 06:00:00		1		1	-24.343	35.346	12	100	0	0	0	0	0	11	18	71	0	0	0	0
71219	71219	SPOT	TAT	2011-09-07 16:59:59		1		1	-24.343	35.346	12	100	0	0	0	0	0	0	0	100	0	0	0	0
71219	71219	SPOT	TAT	2011-09-10 06:00:00		1					12	100	0	0	0	0	0	0	48	52	0	0	0	0
71219	71219	SPOT	TAT	2011-09-10 10:59:59		1					12	100	0	0	0	0	0	0	3	97	0	0	0	0
71219	71219	SPOT	TAT	2011-09-10 22:59:59		1					12	100	0	0	0	0	0	0	2	98	0	0	0	0
71219	71219	SPOT	TAT	2011-09-11 10:59:59		1					12	100	0	0	0	0	0	0	22	78	0	0	0	0
71219	71219	SPOT	TAT	2011-10-02 22:59:59		1					12	100	0	0	0	0	0	0	0	100	0	0	0	0
71219	71219	SPOT	TAT	2011-10-03 04:59:59		1					12	100	0	0	0	0	0	0	0	100	0	0	0	0
71219	71219	SPOT	TAT	2011-10-03 06:00:00		1					12	100	0	0	0	0	0	0	0	100	0	0	0	0
71219	71219	SPOT	TAT	2011-10-03 10:59:59		2					12	100	0	0	0	0	0	0	0	100	0	0	0	0
71219	71219	SPOT	TAT	2011-10-03 16:59:59		3					12	100	0	0	0	0	0	0	0	100	0	0	0	0
71219	71219	SPOT	TAT	2011-10-03 18:00:00		2					12	100	0	0	0	0	0	0	0	100	0	0	0	0
71219	71219	SPOT	TAT	2011-10-03 22:59:59		1					12	100	0	0	0	0	0	0	0	100	0	0	0	0
71219	71219	SPOT	TAT	2011-10-04 06:00:00		1		3	-23.891	35.542	12	100	0	0	0	0	0	0	0	100	0	0	0	0
71219	71219	SPOT	TAT	2011-10-04 10:59:59		2		3	-23.891	35.542	12	100	0	0	0	0	0	0	0	100	0	0	0	0
71219	71219	SPOT	TAT	2011-10-04 16:59:59		2		3	-23.891	35.542	12	100	0	0	0	0	0	0	0	100	0	0	0	0
71219	71219	SPOT	TAT	2011-10-04 18:00:00		2		3	-23.891	35.542	12	100	0	0	0	0	0	0	0	100	0	0	0	0
71222	71222	SPOT	TAT	2011-11-28 07:59:59		7		2	-22.886	31.063	12	100	0	0	0	0	0	0	0	0	34	15	27	24
71222	71222	SPOT	TAT	2011-11-28 10:59:59		3		2	-23.816	35.545	12	100	0	0	0	0	0	0	0	0	100	0	0	0
71222	71222	SPOT	TAT	2011-11-28 16:59:59		3		2	-23.831	35.543	12	100	0	0	0	0	0	0	0	0	100	0	0	0
71222	71222	SPOT	TAT	2011-11-28 18:00:00		2		3	-23.871	35.551	12	100	0	0	0	0	0	0	0	0	100	0	0	0
71222	71222	SPOT	TAT	2011-11-28 22:59:59		1		1	-23.877	35.559	12	100	0	0	0	0	0	0	0	0	100	0	0	0
71222	71222	SPOT	TAT	2011-11-29 04:59:59		2		1	-23.866	35.534	12	100	0	0	0	0	0	0	0	0	100	0	0	0
71222	71222	SPOT	TAT	2011-11-29 06:00:00		3		1	-23.866	35.534	12	100	0	0	0	0	0	0	0	0	100	0	0	0
71222	71222	SPOT	TAT	2011-11-29 10:59:59		3		3	-23.961	35.532	12	100	0	0	0	0	0	0	0	0	100	0	0	0
71222	71222	SPOT	TAT	2011-11-29 16:59:59		1		3	-23.961	35.532	12	100	0	0	0	0	0	0	0	0	100	0	0	0
71222	71222	SPOT	TAT	2011-11-29 18:00:00		1		3	-23.961	35.532	12	100	0	0	0	0	0	0	0	0	100	0	0	0
71222	71222	SPOT	TAT	2011-11-29 22:59:59		1		3	-23.961	35.532	12	100	0	0	0	0	0	0	0	5	95	0	0	0
71222	71222	SPOT	TAT	2011-11-30 04:59:59		1		1	-24.117	35.518	12	100	0	0	0	0	0	0	0	100	0	0	0	0
71222	71222	SPOT	TAT	2011-11-30 06:00:00		1		1	-24.117	35.518	12	100	0	0	0	0	0	0	0	47	53	0	0	0
71222	71222	SPOT	TAT	2011-11-30 16:59:59		1		1	-24.192	35.482	12	100	0	0	0	0	0	0	0	0	100	0	0	0
71222	71222	SPOT	TAT	2011-11-30 18:00:00		1		3	-24.193	35.48	12	100	0	0	0	0	0	0	0	38	62	0	0	0
71222	71222	SPOT	TAT	2011-12-03 10:59:59		1					12	99	0	0	0	57	2	2	2	3	18	15	0	0
71222	71222	SPOT	TAT	2011-12-04 06:00:00		1					12	100	0	0	0	25	11	6	5	9	44	0	0	0
71222	71222	SPOT	TAT	2011-12-04 18:00:00		2					12	100	0	0	0	0	0	0	2	77	21	0	0	0
71222	71222	SPOT	TAT	2011-12-04 22:59:59		2					12	99	0	0	0	32	3	10	5	49	0	0	0	0
71222	71222	SPOT	TAT	2011-12-05 06:00:00		2					12	100	0	0	0	91	4	3	2	0	0	0	0	0
71222	71222	SPOT	TAT	2011-12-05 10:59:59		4		1	-27.315	36.048	12	100	0	0	0	42	7	5	4	6	36	0	0	0
71222	71222	SPOT	TAT	2011-12-05 16:59:59		3		1	-27.315	36.048	12	100	0	0	0	0	0	0	0	100	0	0	0	0
71222	71222	SPOT	TAT	2011-12-05 18:00:00		3		1	-27.315	36.048	12	101	0	0	0	0	0	0	42	47	12	0	0	0
71222	71222	SPOT	TAT	2011-12-05 22:59:59		4		1	-27.315	36.048	12	100	0	0	0	22	9	6	7	54	2	0	0	0
71222	71222	SPOT	TAT	2011-12-06 04:59:59		4		1	-27.315	36.048	12	100	0	0	0	100	0	0	0	0	0	0	0	0
71222	71222	SPOT	TAT	2011-12-06 06:00:00		2		1	-27.315	36.048	12	101	0	0	0	7	7	4	3	9	71	0	0	0
71222	71222	SPOT	TAT	2011-12-06 10:59:59		4		3	-27.276	36.109	12	100	0	0	0	0	10	18	14	28	30	0	0	0
71222	71222	SPOT	TAT	2011-12-06 16:59:59		3		3	-27.276	36.109	12	100	0	0	0	0	0	0	0	14	86	0	0	0
71222	71222	SPOT	TAT	2011-12-06 18:00:00		3		3	-27.276	36.109	12	100	0	0	0	0	0	0	0	36	64	0	0	0
71222	71222	SPOT	TAT	2011-12-06 22:59:59		2		3	-27.276	36.109	12	100	0	0	0	9	15	11	13	18	34	0	0	0
71222	71222	SPOT	TAT	2011-12-07 04:59:59		4		2	-26.822	36.144	12	100	0	0	0	45	25	10	6	14	0	0	0	0
71222	71222	SPOT	TAT	2011-12-07 06:00:00		3		2	-26.822	36.144	12	101	0	0	0	41	15	12	12	21	0	0	0	0
71222	71222	SPOT	TAT	2011-12-07 10:59:59		2		2	-26.822	36.144	12	100	0	0	0	0	0	0	3	47	50	0	0	0
71222	71222	SPOT	TAT	2011-12-07 16:59:59		1		1	-26.665	36.196	12	100	0	0	0	0	0	0	0	5	95	0	0	0
71222	71222	SPOT	TAT	2011-12-07 18:00:00		3		1	-26.665	36.196	12	100	0	0	0	0	0	0	0	38	62	0	0	0
71222	71222	SPOT	TAT	2011-12-07 22:59:59		1		1	-26.665	36.196	12	100	0	0	0	5	15	10	10	54	6	0	0	0
71222	71222	SPOT	TAT	2011-12-13 04:59:59		4		2	-25.978	35.849	12	100	0	0	0	0	49	34	17	0	0	0	0	0
71222	71222	SPOT	TAT	2011-12-13 06:00:00		4		2	-25.978	35.849	12	101	0	0	0	17	25	17	11	18	13	0	0	0
71222	71222	SPOT	TAT	2011-12-13 10:59:59		3		2	-25.978	35.849	12	99	0	0	0	0	15	15	13	23	33	0	0	0
71222	71222	SPOT	TAT	2011-12-13 16:59:59		2		3	-25.991	35.83	12	100	0	0	0	0	0	0	0	36	64	0	0	0
71222	71222	SPOT	TAT	2011-12-13 18:00:00		4		3	-25.991	35.83	12	101	0	0	0	0	0	3	22	54	22	0	0	0
71222	71222	SPOT	TAT	2011-12-13 22:59:59		3		3	-25.991	35.83	12	100	0	0	0	35	4	9	22	24	6	0	0	0
71222	71222	SPOT	TAT	2011-12-14 04:59:59		5		3	-25.991	35.83	12	99	0	0	0	16	31	26	20	6	0	0	0	0
71222	71222	SPOT	TAT	2011-12-14 06:00:00		4		3	-25.991	35.83	12	100	0	0	0	53	17	14	13	3	0	0	0	0
71222	71222	SPOT	TAT	2011-12-14 10:59:59		6		1	-25.836	35.669	12	99	0	0	0	0	14	12	14	32	27	0	0	0
71222	71222	SPOT	TAT	2011-12-14 16:59:59		5		1	-25.836	35.669	12	100	0	0	0	0	0	0	0	61	39	0	0	0
71222	71222	SPOT	TAT	2011-12-14 18:00:00		10		1	-25.836	35.669	12	100	0	0	0	0	0	0	2	97	1	0	0	0
71222	71222	SPOT	TAT	2011-12-14 22:59:59		8		1	-25.836	35.669	12	101	0	0	0	18	4	3	45	19	12	0	0	0
71222	71222	SPOT	TAT	2011-12-15 04:59:59		7		1	-25.852	35.663	12	100	0	0	0	0	0	0	0	0	100	0	0	0
71222	71222	SPOT	TAT	2011-12-15 06:00:00		5		3	-25.849	35.622	12	100	0	0	0	8	15	11	7	14	44	1	0	0
71222	71222	SPOT	TAT	2011-12-15 10:59:59		5		3	-25.849	35.622	12	101	0	0	0	6	22	17	15	35	6	0	0	0
71222	71222	SPOT	TAT	2011-12-15 16:59:59		7		2	-25.961	35.292	12	100	0	0	0	0	0	0	0	5	95	0	0	0
71222	71222	SPOT	TAT	2011-12-15 18:00:00		4		2	-25.961	35.292	12	101	0	0	0	0	0	0	0	4	68	29	0	0
71222	71222	SPOT	TAT	2011-12-15 22:59:59		9		1	-25.959	35.21	12	99	0	0	0	9	7	11	13	39	20	0	0	0
71222	71222	SPOT	TAT	2011-12-16 04:59:59		9		2	-26.074	34.977	12	100	0	0	0	0	0	0	0	0	100	0	0	0
71222	71222	SPOT	TAT	2011-12-16 06:00:00		3		1	-26.091	34.936	12	100	0	0	0	0	0	0	2	14	84	0	0	0
71222	71222	SPOT	TAT	2011-12-16 10:59:59		7		2	-26.206	34.836	12	100	0	0	0	0	0	0	0	20	80	0	0	0
71222	71222	SPOT	TAT	2011-12-16 16:59:59		7		1	-26.297	34.69	12	100	0	0	0	0	0	0	0	0	100	0	0	0
71222	71222	SPOT	TAT	2011-12-16 18:00:00		6		2	-26.301	34.675	12	100	0	0	0	0	0	0	0	7	93	0	0	0
71222	71222	SPOT	TAT	2011-12-16 22:59:59		6		1	-26.341	34.613	12	100	0	0	0	0	0	5	5	42	48	0	0	0
71222	71222	SPOT	TAT	2011-12-17 04:59:59		4		1	-26.593	34.444	12	100	0	0	0	0	0	0	0	0	100	0	0	0
71222	71222	SPOT	TAT	2011-12-17 06:00:00		5		1	-26.593	34.444	12	100	0	0	0	0	0	0	1	7	90	2	0	0
71222	71222	SPOT	TAT	2011-12-17 10:59:59		3		2	-26.736	34.171	12	100	0	0	0	0	2	4	3	15	53	23	0	0
71222	71222	SPOT	TAT	2011-12-17 16:59:59		6		1	-26.899	33.988	12	100	0	0	0	0	0	0	0	0	100	0	0	0
71222	71222	SPOT	TAT	2011-12-17 18:00:00		1		1	-26.899	33.988	12	100	0	0	0	0	0	0	0	0	100	0	0	0
71222	71222	SPOT	TAT	2011-12-17 22:59:59		1		2	-27.04	33.873	12	100	0	0	0	20	8	14	8	19	31	0	0	0
71222	71222	SPOT	TAT	2011-12-18 04:59:59		2		1	-27.309	33.733	12	100	0	0	0	39	17	30	14	0	0	0	0	0
71222	71222	SPOT	TAT	2011-12-19 16:59:59		2					12	100	0	0	0	0	0	0	21	45	34	0	0	0
71222	71222	SPOT	TAT	2011-12-19 18:00:00		3					12	101	0	0	0	0	0	0	4	26	71	0	0	0
71222	71222	SPOT	TAT	2011-12-19 22:59:59		3					12	100	0	0	0	16	13	10	13	45	3	0	0	0
71222	71222	SPOT	TAT	2011-12-20 04:59:59		1					12	100	0	0	0	64	8	14	14	0	0	0	0	0
71222	71222	SPOT	TAT	2011-12-20 06:00:00		5					12	100	0	0	0	61	12	7	7	13	0	0	0	0
71222	71222	SPOT	TAT	2011-12-20 10:59:59		2					12	100	0	0	0	22	30	13	7	21	7	0	0	0
71222	71222	SPOT	TAT	2011-12-20 16:59:59		1		1	-28.105	35.625	12	100	0	0	0	0	0	0	0	0	100	0	0	0
71222	71222	SPOT	TAT	2011-12-20 18:00:00		1		1	-28.105	35.625	12	100	0	0	0	0	0	0	0	13	87	0	0	0
71222	71222	SPOT	TAT	2011-12-20 22:59:59		3		1	-28.105	35.625	12	101	0	0	0	21	11	7	8	18	36	0	0	0
71222	71222	SPOT	TAT	2011-12-21 04:59:59		1		1	-28.105	35.625	12	100	0	0	0	78	7	6	9	0	0	0	0	0
71222	71222	SPOT	TAT	2011-12-21 06:00:00		2		1	-28.105	35.625	12	101	0	0	0	0	8	6	16	26	45	0	0	0
71222	71222	SPOT	TAT	2011-12-21 10:59:59		1		1	-28.105	35.625	12	100	0	0	0	0	1	2	1	7	88	1	0	0
71222	71222	SPOT	TAT	2011-12-21 16:59:59		1		1	-28.031	35.715	12	100	0	0	0	0	0	0	0	31	69	0	0	0
71222	71222	SPOT	TAT	2011-12-21 22:59:59		2		2	-27.72	36.19	12	101	0	0	0	7	14	8	7	59	6	0	0	0
71222	71222	SPOT	TAT	2011-12-22 04:59:59		2		2	-27.72	36.19	12	100	0	0	0	0	0	5	19	19	57	0	0	0
71222	71222	SPOT	TAT	2011-12-22 06:00:00		3		3	-27.672	36.206	12	100	0	0	0	0	0	18	17	44	0	21	0	0
71222	71222	SPOT	TAT	2011-12-22 10:59:59		2		1	-27.615	36.322	12	101	0	0	0	3	5	17	22	41	13	0	0	0
71222	71222	SPOT	TAT	2011-12-22 16:59:59		2		1	-27.615	36.322	12	100	0	0	0	0	0	0	0	28	72	0	0	0
71222	71222	SPOT	TAT	2011-12-22 18:00:00		3		1	-27.615	36.322	12	100	0	0	0	0	0	0	0	30	70	0	0	0
71222	71222	SPOT	TAT	2011-12-22 22:59:59		4		1	-27.615	36.322	12	99	0	0	0	2	15	9	14	43	16	0	0	0
71222	71222	SPOT	TAT	2011-12-23 04:59:59		2		1	-27.055	36.606	12	101	0	0	0	0	39	33	13	16	0	0	0	0
71222	71222	SPOT	TAT	2011-12-23 06:00:00		5		1	-27.055	36.606	12	100	0	0	0	4	19	25	29	22	1	0	0	0
71222	71222	SPOT	TAT	2011-12-23 10:59:59		3		1	-27.055	36.606	12	100	0	0	0	7	6	6	8	58	15	0	0	0
71222	71222	SPOT	TAT	2011-12-23 16:59:59		1		1	-27.055	36.606	12	100	0	0	0	0	0	0	0	0	100	0	0	0
71222	71222	SPOT	TAT	2011-12-23 18:00:00		2		1	-27.055	36.606	12	100	0	0	0	0	0	0	0	0	100	0	0	0
71222	71222	SPOT	TAT	2011-12-23 22:59:59		3		2	-26.985	36.562	12	100	0	0	0	0	10	16	16	33	25	0	0	0
71222	71222	SPOT	TAT	2011-12-24 04:59:59		4		2	-26.985	36.562	12	100	0	0	0	0	45	16	19	16	4	0	0	0
71222	71222	SPOT	TAT	2011-12-24 06:00:00		6		1	-26.69	36.431	12	101	0	0	0	3	28	24	18	18	10	0	0	0
71222	71222	SPOT	TAT	2011-12-24 16:59:59		3		1	-26.69	36.431	12	100	0	0	0	0	0	0	0	0	100	0	0	0
71222	71222	SPOT	TAT	2011-12-24 18:00:00		1		2	-26.655	36.441	12	100	0	0	0	0	0	0	0	0	100	0	0	0
71222	71222	SPOT	TAT	2011-12-25 04:59:59		2		3	-26.556	36.288	12	100	0	0	0	0	0	37	33	30	0	0	0	0
71222	71222	SPOT	TAT	2011-12-25 06:00:00		3		3	-26.556	36.288	12	101	0	0	0	5	4	6	6	17	63	0	0	0
71222	71222	SPOT	TAT	2011-12-25 10:59:59		1		3	-26.556	36.288	12	101	0	0	0	0	2	6	4	25	63	1	0	0
71222	71222	SPOT	TAT	2011-12-25 16:59:59		1		2	-26.416	36.056	12	101	0	0	0	0	0	0	0	48	53	0	0	0
71222	71222	SPOT	TAT	2011-12-25 18:00:00		1		2	-26.416	36.056	12	100	0	0	0	0	0	0	0	0	100	0	0	0
71222	71222	SPOT	TAT	2011-12-25 22:59:59		1		2	-26.416	36.056	12	100	0	0	0	0	0	5	3	12	80	0	0	0
71222	71222	SPOT	TAT	2011-12-26 04:59:59		1		2	-26.394	36.052	12	100	0	0	0	0	0	0	0	0	100	0	0	0
71222	71222	SPOT	TAT	2011-12-26 06:00:00		2		2	-26.394	36.052	12	100	0	0	0	0	0	0	0	12	88	0	0	0
71222	71222	SPOT	TAT	2011-12-26 10:59:59		3		2	-26.355	35.84	12	100	0	0	0	0	0	0	0	15	85	0	0	0
71222	71222	SPOT	TAT	2011-12-26 16:59:59		1		1	-26.293	35.869	12	100	0	0	0	0	0	0	0	0	100	0	0	0
71222	71222	SPOT	TAT	2011-12-28 22:59:59		1					12	101	0	0	0	21	13	8	14	43	2	0	0	0
71222	71222	SPOT	TAT	2011-12-29 04:59:59		2					12	101	0	0	0	57	14	15	15	0	0	0	0	0
71222	71222	SPOT	TAT	2011-12-29 06:00:00		6					12	101	0	0	0	56	12	6	6	11	10	0	0	0
71222	71222	SPOT	TAT	2011-12-29 10:59:59		13					12	100	0	0	0	49	7	5	3	7	29	0	0	0
71222	71222	SPOT	TAT	2011-12-29 16:59:59		11					12	100	0	0	0	0	0	0	0	13	87	0	0	0
71222	71222	SPOT	TAT	2011-12-29 18:00:00		17					12	100	0	0	0	0	0	0	0	44	56	0	0	0
71222	71222	SPOT	TAT	2011-12-29 22:59:59		22					12	100	0	0	0	32	3	9	12	43	1	0	0	0
71222	71222	SPOT	TAT	2011-12-30 04:59:59		21		2	-26.602	36.579	12	100	0	0	0	0	0	0	0	0	100	0	0	0
71222	71222	SPOT	TAT	2011-12-30 06:00:00		22		2	-26.602	36.579	12	100	0	0	0	16	5	3	3	5	68	0	0	0
71222	71222	SPOT	TAT	2011-12-30 10:59:59		29		2	-26.602	36.579	12	100	0	0	0	38	6	8	8	25	15	0	0	0
71222	71222	SPOT	TAT	2011-12-30 16:59:59		33		2	-26.602	36.579	12	100	0	0	0	0	0	0	4	96	0	0	0	0
71222	71222	SPOT	TAT	2011-12-30 18:00:00		30		2	-26.602	36.579	12	100	0	0	0	0	0	0	0	28	72	0	0	0
71222	71222	SPOT	TAT	2011-12-30 22:59:59		32		2	-26.602	36.579	12	100	0	0	0	0	0	0	0	53	47	0	0	0
71222	71222	SPOT	TAT	2011-12-31 04:59:59		34		3	-26.535	36.51	12	100	0	0	0	0	0	0	0	0	100	0	0	0
71222	71222	SPOT	TAT	2011-12-31 06:00:00		34		3	-26.519	36.492	12	100	0	0	0	0	0	0	0	0	100	0	0	0
71222	71222	SPOT	TAT	2011-12-31 10:59:59		35		1	-26.44	36.376	12	100	0	0	0	0	0	0	0	0	100	0	0	0
71222	71222	SPOT	TAT	2011-12-31 16:59:59		37		3	-26.363	36.194	12	100	0	0	0	0	0	0	0	0	100	0	0	0
71222	71222	SPOT	TAT	2011-12-31 18:00:00		38		2	-26.357	36.176	12	100	0	0	0	0	0	0	0	0	100	0	0	0
71222	71222	SPOT	TAT	2011-12-31 22:59:59		33		1	-26.32	36.057	12	100	0	0	0	0	0	0	0	6	94	0	0	0
71222	71222	SPOT	TAT	2012-01-01 04:59:59		32		3	-26.297	35.949	12	100	0	0	0	0	0	0	0	0	100	0	0	0
71222	71222	SPOT	TAT	2012-01-01 06:00:00		32		3	-26.297	35.94	12	100	0	0	0	0	0	0	0	0	75	25	0	0
71222	71222	SPOT	TAT	2012-01-01 10:59:59		32		2	-26.282	35.814	12	100	0	0	0	0	0	0	0	0	76	24	0	0
71222	71222	SPOT	TAT	2012-01-01 16:59:59		31		2	-26.269	35.703	12	100	0	0	0	0	10	15	7	9	59	0	0	0
71222	71222	SPOT	TAT	2012-01-01 18:00:00		34		2	-26.271	35.658	12	100	0	0	0	0	0	0	1	5	94	0	0	0
71222	71222	SPOT	TAT	2012-01-01 22:59:59		35		3	-26.311	35.529	12	100	0	0	0	0	0	0	0	0	100	0	0	0
71222	71222	SPOT	TAT	2012-01-02 04:59:59		31		2	-26.356	35.407	12	100	0	0	0	0	0	0	0	0	100	0	0	0
71222	71222	SPOT	TAT	2012-01-02 06:00:00		26		3	-26.366	35.389	12	100	0	0	0	0	0	0	0	0	34	16	16	34
71222	71222	SPOT	TAT	2012-01-02 10:59:59		20		3	-26.427	35.254	12	100	0	0	0	0	0	0	0	0	15	46	26	13
71222	71222	SPOT	TAT	2012-01-02 16:59:59		20		3	-26.492	35.101	12	100	0	0	0	0	0	0	0	0	100	0	0	0
71222	71222	SPOT	TAT	2012-01-02 18:00:00		13		3	-26.493	35.098	12	100	0	0	0	0	0	0	0	0	100	0	0	0
71222	71222	SPOT	TAT	2012-01-02 22:59:59		11		3	-26.572	34.918	12	100	0	0	0	0	0	0	0	0	100	0	0	0
71222	71222	SPOT	TAT	2012-01-03 04:59:59		9		3	-26.703	34.738	12	100	0	0	0	0	0	0	0	0	100	0	0	0
71222	71222	SPOT	TAT	2012-01-03 06:00:00		5		3	-26.737	34.696	12	100	0	0	0	0	0	0	0	0	88	12	0	0
71222	71222	SPOT	TAT	2012-01-03 10:59:59		5		3	-26.879	34.596	12	100	0	0	0	0	0	0	0	0	69	31	0	0
71222	71222	SPOT	TAT	2012-01-03 16:59:59		3		3	-27.056	34.476	12	100	0	0	0	0	0	0	0	0	100	0	0	0
71222	71222	SPOT	TAT	2012-01-03 18:00:00		20		2	-27.058	34.472	12	100	0	0	0	0	0	0	0	0	100	0	0	0
71222	71222	SPOT	TAT	2012-01-03 22:59:59		23		3	-27.187	34.323	12	100	0	0	0	0	0	0	0	0	100	0	0	0
71222	71222	SPOT	TAT	2012-01-04 04:59:59		18		3	-27.365	34.181	12	100	0	0	0	0	0	0	0	0	100	0	0	0
71222	71222	SPOT	TAT	2012-01-04 06:00:00		17		3	-27.402	34.164	12	100	0	0	0	0	0	0	0	0	41	59	0	0
71222	71222	SPOT	TAT	2012-01-04 10:59:59		16		3	-27.554	34.087	12	100	0	0	0	0	0	0	0	0	39	61	0	0
71222	71222	SPOT	TAT	2012-01-04 16:59:59		15		2	-27.747	34.051	12	100	0	0	0	0	0	0	0	0	100	0	0	0
71222	71222	SPOT	TAT	2012-01-04 18:00:00		14		2	-27.775	34.044	12	100	0	0	0	0	0	0	0	0	100	0	0	0
71222	71222	SPOT	TAT	2012-01-04 22:59:59		16		3	-27.879	34.018	12	100	0	0	0	0	0	0	0	0	100	0	0	0
71222	71222	SPOT	TAT	2012-01-05 04:59:59		14		3	-28.017	34.023	12	100	0	0	0	0	0	0	0	0	100	0	0	0
71222	71222	SPOT	TAT	2012-01-05 06:00:00		13		3	-28.046	34.034	12	100	0	0	0	0	0	0	0	0	76	24	0	0
71222	71222	SPOT	TAT	2012-01-05 10:59:59		12		2	-28.125	34.058	12	100	0	0	0	0	0	0	0	0	45	55	0	0
71222	71222	SPOT	TAT	2012-01-05 16:59:59		11		2	-28.125	34.058	12	100	0	0	0	0	0	0	0	0	100	0	0	0
71222	71222	SPOT	TAT	2012-01-05 18:00:00		12		3	-28.279	34.156	12	100	0	0	0	0	0	0	0	0	100	0	0	0
71222	71222	SPOT	TAT	2012-01-05 22:59:59		12		3	-28.279	34.156	12	100	0	0	0	0	0	0	0	0	100	0	0	0
71222	71222	SPOT	TAT	2012-01-06 04:59:59		9		1	-28.337	34.179	12	100	0	0	0	0	0	0	0	0	100	0	0	0
71222	71222	SPOT	TAT	2012-01-06 06:00:00		14		3	-28.342	34.187	12	100	0	0	0	0	0	0	0	0	54	46	0	0
71222	71222	SPOT	TAT	2012-01-06 10:59:59		15		3	-28.342	34.187	12	100	0	0	0	0	0	0	0	0	23	77	0	0
71222	71222	SPOT	TAT	2012-01-06 16:59:59		13		2	-28.421	34.482	12	100	0	0	0	0	0	0	0	0	100	0	0	0
71222	71222	SPOT	TAT	2012-01-06 18:00:00		14		2	-28.421	34.482	12	100	0	0	0	0	0	0	0	0	100	0	0	0
71222	71222	SPOT	TAT	2012-01-06 22:59:59		8		2	-28.421	34.482	12	100	0	0	0	0	0	0	0	0	100	0	0	0
71222	71222	SPOT	TAT	2012-01-07 04:59:59		7		1	-28.461	34.579	12	100	0	0	0	0	0	0	0	0	100	0	0	0
71222	71222	SPOT	TAT	2012-01-07 06:00:00		7		3	-28.465	34.594	12	100	0	0	0	0	0	0	0	0	52	48	0	0
71222	71222	SPOT	TAT	2012-01-07 10:59:59		6		3	-28.47	34.615	12	100	0	0	0	0	0	0	0	0	29	71	0	0
71222	71222	SPOT	TAT	2012-01-07 16:59:59		7		2	-28.349	35.135	12	100	0	0	0	0	0	0	0	0	100	0	0	0
71222	71222	SPOT	TAT	2012-01-07 18:00:00		6		2	-28.349	35.135	12	100	0	0	0	0	0	0	0	0	100	0	0	0
71222	71222	SPOT	TAT	2012-01-07 22:59:59		10		2	-28.349	35.135	12	100	0	0	0	0	0	0	0	0	100	0	0	0
71222	71222	SPOT	TAT	2012-01-08 04:59:59		10		3	-28.309	35.267	12	100	0	0	0	0	0	0	0	0	48	52	0	0
71222	71222	SPOT	TAT	2012-01-08 06:00:00		7		3	-28.295	35.312	12	100	0	0	0	0	0	0	0	0	0	100	0	0
71222	71222	SPOT	TAT	2012-01-08 10:59:59		8		2	-28.285	35.322	12	100	0	0	0	0	0	0	0	0	10	90	0	0
71222	71222	SPOT	TAT	2012-01-08 16:59:59		8		2	-27.98	35.817	12	100	0	0	0	0	0	0	0	0	100	0	0	0
71222	71222	SPOT	TAT	2012-01-08 18:00:00		10		2	-27.98	35.817	12	100	0	0	0	0	0	0	0	0	100	0	0	0
71222	71222	SPOT	TAT	2012-01-08 22:59:59		12		2	-27.98	35.817	12	100	0	0	0	0	0	0	0	0	0	100	0	0
71222	71222	SPOT	TAT	2012-01-09 04:59:59		12		3	-27.897	35.909	12	100	0	0	0	0	0	0	0	0	17	83	0	0
71222	71222	SPOT	TAT	2012-01-09 06:00:00		11		3	-27.874	35.931	12	100	0	0	0	0	0	0	0	0	0	100	0	0
71222	71222	SPOT	TAT	2012-01-09 10:59:59		12		3	-27.874	35.931	12	100	0	0	0	0	0	0	0	0	21	79	0	0
71222	71222	SPOT	TAT	2012-01-09 16:59:59		12		2	-27.44	35.884	12	100	0	0	0	0	0	0	0	0	100	0	0	0
71222	71222	SPOT	TAT	2012-01-09 18:00:00		12		2	-27.44	35.884	12	100	0	0	0	0	0	0	0	0	100	0	0	0
71222	71222	SPOT	TAT	2012-01-09 22:59:59		12		2	-27.44	35.884	12	101	0	0	0	0	0	0	0	0	98	3	0	0
71222	71222	SPOT	TAT	2012-01-10 04:59:59		9		2	-27.362	35.804	12	100	0	0	0	0	0	0	0	0	1	99	0	0
71222	71222	SPOT	TAT	2012-01-10 06:00:00		10		3	-27.356	35.797	12	100	0	0	0	0	0	0	0	0	0	100	0	0
71222	71222	SPOT	TAT	2012-01-10 10:59:59		11		3	-27.356	35.797	12	100	0	0	0	0	0	0	0	0	0	100	0	0
71222	71222	SPOT	TAT	2012-01-10 16:59:59		10		2	-27.148	35.253	12	100	0	0	0	0	0	0	0	0	0	100	0	0
71222	71222	SPOT	TAT	2012-01-10 18:00:00		11		2	-27.148	35.253	12	100	0	0	0	0	0	0	0	0	49	51	0	0
71222	71222	SPOT	TAT	2012-01-10 22:59:59		12		2	-27.148	35.253	12	100	0	0	0	0	0	0	0	0	83	17	0	0
71222	71222	SPOT	TAT	2012-01-11 04:59:59		11		3	-27.175	35.064	12	100	0	0	0	0	0	0	0	0	0	100	0	0
71222	71222	SPOT	TAT	2012-01-11 06:00:00		11		3	-27.182	35.063	12	100	0	0	0	0	0	0	0	0	0	100	0	0
71222	71222	SPOT	TAT	2012-01-11 10:59:59		11		3	-27.182	35.063	12	100	0	0	0	0	0	0	0	0	0	100	0	0
71222	71222	SPOT	TAT	2012-01-11 16:59:59		11		2	-27.555	34.465	12	100	0	0	0	0	0	0	0	0	28	72	0	0
71222	71222	SPOT	TAT	2012-01-11 18:00:00		9		2	-27.555	34.465	12	100	0	0	0	0	0	0	0	0	99	1	0	0
71222	71222	SPOT	TAT	2012-01-11 22:59:59		10		2	-27.555	34.465	12	100	0	0	0	0	0	0	0	0	93	7	0	0
71222	71222	SPOT	TAT	2012-01-12 04:59:59		11		2	-27.674	34.311	12	100	0	0	0	0	0	0	0	0	1	99	0	0
71222	71222	SPOT	TAT	2012-01-12 06:00:00		10		2	-27.674	34.311	12	100	0	0	0	0	0	0	0	0	0	100	0	0
71222	71222	SPOT	TAT	2012-01-12 10:59:59		10		2	-27.674	34.311	12	100	0	0	0	0	0	0	0	0	21	79	0	0
71222	71222	SPOT	TAT	2012-01-12 16:59:59		9		2	-28.204	34.135	12	100	0	0	0	0	0	0	0	0	100	0	0	0
71222	71222	SPOT	TAT	2012-01-12 18:00:00		10		2	-28.204	34.135	12	100	0	0	0	0	0	0	0	0	100	0	0	0
71222	71222	SPOT	TAT	2012-01-12 22:59:59		8		2	-28.204	34.135	12	100	0	0	0	0	0	0	0	0	92	8	0	0
71222	71222	SPOT	TAT	2012-01-13 04:59:59		8		2	-28.312	34.14	12	100	0	0	0	0	0	0	0	0	0	100	0	0
71222	71222	SPOT	TAT	2012-01-13 06:00:00		8		2	-28.312	34.14	12	100	0	0	0	0	0	0	0	0	0	100	0	0
71222	71222	SPOT	TAT	2012-01-13 10:59:59		8		2	-28.312	34.14	12	100	0	0	0	0	0	0	0	0	31	69	0	0
71222	71222	SPOT	TAT	2012-01-13 16:59:59		9		2	-28.466	34.565	12	100	0	0	0	0	0	0	0	0	100	0	0	0
71222	71222	SPOT	TAT	2012-01-13 18:00:00		9		2	-28.466	34.565	12	100	0	0	0	0	0	0	0	0	100	0	0	0
71222	71222	SPOT	TAT	2012-01-13 22:59:59		4		2	-28.466	34.565	12	100	0	0	0	0	0	0	0	0	97	3	0	0
71222	71222	SPOT	TAT	2012-01-14 04:59:59		3		3	-28.44	34.682	12	100	0	0	0	0	0	0	0	0	14	86	0	0
71222	71222	SPOT	TAT	2012-01-14 06:00:00		3		3	-28.44	34.682	12	100	0	0	0	0	0	0	0	0	18	82	0	0
71222	71222	SPOT	TAT	2012-01-14 10:59:59		4		3	-28.44	34.682	12	100	0	0	0	0	0	0	0	0	11	89	0	0
71222	71222	SPOT	TAT	2012-01-14 16:59:59		5		1	-28.138	35.249	12	100	0	0	0	0	0	0	0	0	100	0	0	0
71222	71222	SPOT	TAT	2012-01-14 18:00:00		5		1	-28.138	35.249	12	100	0	0	0	0	0	0	0	0	100	0	0	0
71222	71222	SPOT	TAT	2012-01-14 22:59:59		6		1	-28.138	35.249	12	100	0	0	0	0	0	0	0	0	93	7	0	0
71222	71222	SPOT	TAT	2012-01-15 04:59:59		4		3	-28.06	35.314	12	100	0	0	0	0	0	0	0	0	1	99	0	0
71222	71222	SPOT	TAT	2012-01-15 06:00:00		8		3	-28.06	35.314	12	100	0	0	0	0	0	0	0	0	6	94	0	0
71222	71222	SPOT	TAT	2012-01-15 10:59:59		8		3	-28.06	35.314	12	100	0	0	0	0	0	0	0	0	43	57	0	0
71222	71222	SPOT	TAT	2012-01-15 16:59:59		10		2	-27.609	35.219	12	100	0	0	0	0	0	0	0	0	100	0	0	0
71222	71222	SPOT	TAT	2012-01-15 18:00:00		10		2	-27.609	35.219	12	100	0	0	0	0	0	0	0	0	100	0	0	0
71222	71222	SPOT	TAT	2012-01-15 22:59:59		11		2	-27.609	35.219	12	100	0	0	0	0	0	0	0	0	100	0	0	0
71222	71222	SPOT	TAT	2012-01-16 04:59:59		12		2	-27.563	35.072	12	100	0	0	0	0	0	0	0	0	100	0	0	0
71222	71222	SPOT	TAT	2012-01-16 06:00:00		11		2	-27.563	35.072	12	100	0	0	0	0	0	0	0	0	85	15	0	0
71222	71222	SPOT	TAT	2012-01-16 10:59:59		9		2	-27.563	35.072	12	100	0	0	0	0	0	0	0	0	100	0	0	0
71222	71222	SPOT	TAT	2012-01-16 16:59:59		6		2	-27.837	34.564	12	100	0	0	0	0	0	0	0	0	100	0	0	0
71222	71222	SPOT	TAT	2012-01-16 18:00:00		8		2	-27.837	34.564	12	100	0	0	0	0	0	0	0	0	100	0	0	0
71222	71222	SPOT	TAT	2012-01-16 22:59:59		9		2	-27.837	34.564	12	100	0	0	0	0	0	0	0	0	100	0	0	0
71222	71222	SPOT	TAT	2012-01-17 04:59:59		9		2	-27.849	34.508	12	100	0	0	0	0	0	0	0	0	100	0	0	0
71222	71222	SPOT	TAT	2012-01-17 06:00:00		10		2	-27.849	34.508	12	100	0	0	0	0	0	0	0	0	74	26	0	0
71222	71222	SPOT	TAT	2012-01-17 10:59:59		9		2	-27.849	34.508	12	100	0	0	0	0	0	0	0	0	95	5	0	0
71222	71222	SPOT	TAT	2012-01-17 16:59:59		8		1	-28.28	34.374	12	100	0	0	0	0	0	0	0	0	100	0	0	0
71222	71222	SPOT	TAT	2012-01-17 18:00:00		7		1	-28.28	34.374	12	100	0	0	0	0	0	0	0	0	100	0	0	0
71222	71222	SPOT	TAT	2012-01-17 22:59:59		4		1	-28.28	34.374	12	100	0	0	0	0	0	0	0	0	100	0	0	0
71222	71222	SPOT	TAT	2012-01-18 04:59:59		6		3	-28.305	34.429	12	100	0	0	0	0	0	0	0	0	100	0	0	0
71222	71222	SPOT	TAT	2012-01-18 06:00:00		8		3	-28.305	34.429	12	100	0	0	0	0	0	0	0	0	80	20	0	0
71222	71222	SPOT	TAT	2012-01-18 10:59:59		7		3	-28.305	34.429	12	100	0	0	0	0	0	0	0	0	75	25	0	0
71222	71222	SPOT	TAT	2012-01-18 16:59:59		8		1	-28.411	34.793	12	100	0	0	0	0	0	0	0	0	100	0	0	0
71222	71222	SPOT	TAT	2012-01-18 18:00:00		8		1	-28.411	34.793	12	100	0	0	0	0	0	0	0	0	100	0	0	0
71222	71222	SPOT	TAT	2012-01-18 22:59:59		8		1	-28.411	34.793	12	100	0	0	0	0	0	0	0	0	100	0	0	0
71222	71222	SPOT	TAT	2012-01-19 04:59:59		9		3	-28.437	34.913	12	100	0	0	0	0	0	0	0	0	100	0	0	0
71222	71222	SPOT	TAT	2012-01-19 06:00:00		9		3	-28.437	34.913	12	100	0	0	0	0	0	0	0	0	100	0	0	0
71222	71222	SPOT	TAT	2012-01-19 10:59:59		8		3	-28.437	34.913	12	100	0	0	0	0	0	0	0	0	100	0	0	0
71222	71222	SPOT	TAT	2012-01-19 16:59:59		7		1	-28.352	35.525	12	100	0	0	0	0	0	0	0	0	100	0	0	0
71222	71222	SPOT	TAT	2012-01-19 18:00:00		10		1	-28.352	35.525	12	100	0	0	0	0	0	0	0	0	100	0	0	0
71222	71222	SPOT	TAT	2012-01-19 22:59:59		6		1	-28.352	35.525	12	100	0	0	0	0	0	0	0	0	100	0	0	0
71222	71222	SPOT	TAT	2012-01-20 04:59:59		9		1	-28.366	35.6	12	100	0	0	0	0	0	0	0	0	100	0	0	0
71222	71222	SPOT	TAT	2012-01-20 06:00:00		8		1	-28.366	35.6	12	100	0	0	0	0	0	0	0	0	100	0	0	0
71222	71222	SPOT	TAT	2012-01-20 10:59:59		8		1	-28.366	35.6	12	100	0	0	0	0	0	0	0	0	100	0	0	0
71222	71222	SPOT	TAT	2012-01-20 16:59:59		8		2	-28.288	35.95	12	100	0	0	0	0	0	0	0	0	100	0	0	0
71222	71222	SPOT	TAT	2012-01-20 18:00:00		8		2	-28.288	35.95	12	100	0	0	0	0	0	0	0	0	100	0	0	0
71222	71222	SPOT	TAT	2012-01-20 22:59:59		4		2	-28.288	35.95	12	100	0	0	0	0	0	0	0	0	100	0	0	0
71222	71222	SPOT	TAT	2012-01-21 04:59:59		6		1	-28.284	35.959	12	100	0	0	0	0	0	0	0	0	100	0	0	0
71222	71222	SPOT	TAT	2012-01-21 06:00:00		6		1	-28.284	35.959	12	100	0	0	0	0	0	0	0	0	86	14	0	0
71222	71222	SPOT	TAT	2012-01-21 10:59:59		6		1	-28.284	35.959	12	100	0	0	0	0	0	0	0	0	76	24	0	0
71222	71222	SPOT	TAT	2012-01-21 16:59:59		5		2	-28.133	36.047	12	100	0	0	0	0	0	0	0	0	100	0	0	0
71222	71222	SPOT	TAT	2012-01-21 18:00:00		5		2	-28.133	36.047	12	100	0	0	0	0	0	0	0	0	100	0	0	0
70810	70810	SPOT	TAT	2011-07-19 10:00:00	1	4		1	-23.906	35.549	12	100	0	0	0	0	0	0	0	100	0	0	0	0
70810	70810	SPOT	TAT	2011-07-19 10:59:59	2	1		1	-23.906	35.549	12	100	0	0	0	0	0	0	0	100	0	0	0	0
70810	70810	SPOT	TAT	2011-07-20 04:59:59	3	1		1	-23.847	35.574	12	100	0	0	0	0	0	0	22	78	0	0	0	0
70810	70810	SPOT	TAT	2011-07-20 06:00:00	4	1		1	-23.847	35.574	12	100	0	0	0	0	0	0	37	63	0	0	0	0
70810	70810	SPOT	TAT	2011-07-20 10:59:59	5	1		1	-23.847	35.574	12	100	0	0	0	0	0	0	0	100	0	0	0	0
70810	70810	SPOT	TAT	2011-07-20 16:59:59	6	1		2	-23.844	35.553	12	100	0	0	0	0	0	0	0	100	0	0	0	0
70810	70810	SPOT	TAT	2011-07-20 18:00:00	7	1		2	-23.844	35.553	12	100	0	0	0	0	0	0	0	100	0	0	0	0
70810	70810	SPOT	TAT	2011-07-21 04:59:59	8	3		2	-23.844	35.553	12	100	0	0	0	0	0	0	12	88	0	0	0	0
70810	70810	SPOT	TAT	2011-07-21 06:00:00	9	5		2	-23.844	35.553	12	100	0	0	0	0	0	0	0	100	0	0	0	0
70810	70810	SPOT	TAT	2011-07-21 10:59:59	10	7		2	-23.844	35.553	12	101	0	0	0	0	0	0	3	98	0	0	0	0
70810	70810	SPOT	TAT	2011-07-21 16:59:59	11	7		2	-23.844	35.553	12	100	0	0	0	0	0	0	0	100	0	0	0	0
70810	70810	SPOT	TAT	2011-07-21 18:00:00	12	4		2	-23.844	35.553	12	100	0	0	0	0	0	0	0	100	0	0	0	0
70810	70810	SPOT	TAT	2011-07-21 22:59:59	13	6		2	-23.844	35.553	12	100	0	0	0	0	0	0	0	100	0	0	0	0
70810	70810	SPOT	TAT	2011-07-22 04:59:59	14	5		2	-23.607	35.564	12	100	0	0	0	0	0	0	9	91	0	0	0	0
70810	70810	SPOT	TAT	2011-07-22 06:00:00	15	6		2	-23.607	35.564	12	100	0	0	0	0	0	0	0	100	0	0	0	0
70810	70810	SPOT	TAT	2011-07-22 10:59:59	16	4		2	-23.607	35.564	12	100	0	0	0	0	0	0	15	85	0	0	0	0
70810	70810	SPOT	TAT	2011-07-22 16:59:59	17	3		2	-23.607	35.564	12	100	0	0	0	0	0	0	0	100	0	0	0	0
70810	70810	SPOT	TAT	2011-07-22 18:00:00	18	6		2	-23.607	35.564	12	100	0	0	0	0	0	0	0	100	0	0	0	0
70810	70810	SPOT	TAT	2011-07-22 22:59:59	19	7		3	-23.423	35.543	12	100	0	0	0	0	0	0	0	100	0	0	0	0
70810	70810	SPOT	TAT	2011-07-23 04:59:59	20	3		3	-23.423	35.543	12	100	0	0	0	0	0	0	1	99	0	0	0	0
70810	70810	SPOT	TAT	2011-07-23 06:00:00	21	4		3	-23.423	35.543	12	100	0	0	0	0	0	0	15	85	0	0	0	0
70810	70810	SPOT	TAT	2011-07-23 10:59:59	22	3		1	-23.323	35.502	12	100	0	0	0	0	0	0	0	100	0	0	0	0
70810	70810	SPOT	TAT	2011-07-23 16:59:59	23	3		1	-23.242	35.51	12	100	0	0	0	0	0	0	0	100	0	0	0	0
70810	70810	SPOT	TAT	2011-07-23 18:00:00	24	5		1	-23.242	35.51	12	100	0	0	0	0	0	0	0	100	0	0	0	0
70810	70810	SPOT	TAT	2011-07-23 22:59:59	25	4		2	-23.122	35.532	12	100	0	0	0	0	0	0	0	100	0	0	0	0
70810	70810	SPOT	TAT	2011-07-24 04:59:59	26	1		2	-23.048	35.566	12	100	0	0	0	0	0	0	0	100	0	0	0	0
70810	70810	SPOT	TAT	2011-07-24 06:00:00	27	1		2	-23.051	35.566	12	100	0	0	0	0	0	0	0	100	0	0	0	0
70810	70810	SPOT	TAT	2011-07-24 16:59:59	28	1		2	-22.956	35.619	12	100	0	0	0	0	0	0	5	95	0	0	0	0
70810	70810	SPOT	TAT	2011-07-24 18:00:00	29	1		2	-22.956	35.619	12	100	0	0	0	0	0	2	28	70	0	0	0	0
70810	70810	SPOT	TAT	2011-07-24 22:59:59	30	1		2	-22.956	35.619	12	100	0	0	0	0	0	0	0	100	0	0	0	0
70810	70810	SPOT	TAT	2011-07-25 04:59:59	31	2		2	-22.854	35.577	12	100	0	0	0	0	0	0	0	100	0	0	0	0
70810	70810	SPOT	TAT	2011-07-25 06:00:00	32	3		2	-22.854	35.577	12	100	0	0	0	0	0	0	0	100	0	0	0	0
70810	70810	SPOT	TAT	2011-07-25 10:59:59	33	3		2	-22.854	35.577	12	100	0	0	0	0	0	0	0	100	0	0	0	0
70810	70810	SPOT	TAT	2011-07-25 16:59:59	34	1		2	-22.854	35.577	12	100	0	0	0	0	0	0	0	100	0	0	0	0
70810	70810	SPOT	TAT	2011-07-25 18:00:00	35	5		2	-22.854	35.577	12	100	0	0	0	0	0	0	0	100	0	0	0	0
70810	70810	SPOT	TAT	2011-07-25 22:59:59	36	2		2	-22.51	35.524	12	100	0	0	0	0	0	0	0	100	0	0	0	0
70810	70810	SPOT	TAT	2011-07-26 04:59:59	37	2		2	-22.51	35.524	12	100	0	0	0	0	0	0	0	100	0	0	0	0
70810	70810	SPOT	TAT	2011-07-26 06:00:00	38	3		2	-22.51	35.524	12	100	0	0	0	0	0	0	0	100	0	0	0	0
70810	70810	SPOT	TAT	2011-07-26 10:59:59	39	4		2	-22.51	35.524	12	100	0	0	0	0	0	0	0	100	0	0	0	0
70810	70810	SPOT	TAT	2011-07-26 16:59:59	40	3		2	-22.51	35.524	12	100	0	0	0	0	0	0	0	100	0	0	0	0
70810	70810	SPOT	TAT	2011-07-26 18:00:00	41	4		2	-22.51	35.524	12	100	0	0	0	0	0	0	0	100	0	0	0	0
70810	70810	SPOT	TAT	2011-07-26 22:59:59	42	2		3	-22.259	35.549	12	100	0	0	0	0	0	0	0	100	0	0	0	0
70810	70810	SPOT	TAT	2011-07-27 04:59:59	43	3		1	-22.254	35.546	12	100	0	0	0	0	0	0	0	100	0	0	0	0
70810	70810	SPOT	TAT	2011-07-27 06:00:00	44	1		2	-22.232	35.543	12	100	0	0	0	0	0	0	0	100	0	0	0	0
70810	70810	SPOT	TAT	2011-07-27 16:59:59	45	1		2	-22.058	35.542	12	100	0	0	0	0	0	0	0	100	0	0	0	0
70810	70810	SPOT	TAT	2011-07-27 18:00:00	46	4		2	-22.058	35.542	12	100	0	0	0	0	0	0	0	100	0	0	0	0
70810	70810	SPOT	TAT	2011-07-27 22:59:59	47	4		1	-21.948	35.534	12	100	0	0	0	0	0	0	0	100	0	0	0	0
70810	70810	SPOT	TAT	2011-07-28 04:59:59	48	5		1	-21.948	35.534	12	100	0	0	0	0	0	0	0	100	0	0	0	0
70810	70810	SPOT	TAT	2011-07-28 06:00:00	49	3		1	-21.948	35.534	12	100	0	0	0	0	0	0	0	100	0	0	0	0
70810	70810	SPOT	TAT	2011-07-28 10:59:59	50	5		3	-21.673	35.499	12	100	0	0	0	0	0	0	0	100	0	0	0	0
70810	70810	SPOT	TAT	2011-07-28 16:59:59	51	4		3	-21.673	35.499	12	100	0	0	0	0	0	0	0	100	0	0	0	0
70810	70810	SPOT	TAT	2011-07-28 18:00:00		14		3	-21.673	35.499	12	100	0	0	0	0	0	0	0	100	0	0	0	0
70810	70810	SPOT	TAT	2011-07-28 22:59:59		8		3	-21.693	35.496	12	100	0	0	0	0	0	0	0	100	0	0	0	0
70810	70810	SPOT	TAT	2011-07-29 04:59:59		6		3	-21.721	35.501	12	100	0	0	0	0	0	0	0	100	0	0	0	0
70810	70810	SPOT	TAT	2011-07-29 06:00:00		7		3	-21.728	35.508	12	100	0	0	0	0	0	0	0	100	0	0	0	0
70810	70810	SPOT	TAT	2011-07-29 10:59:59		3		3	-21.778	35.496	12	100	0	0	0	0	0	0	0	100	0	0	0	0
70810	70810	SPOT	TAT	2011-07-29 16:59:59		3		3	-21.8	35.523	12	100	0	0	0	0	0	0	0	100	0	0	0	0
70810	70810	SPOT	TAT	2011-07-29 18:00:00		1		3	-21.801	35.511	12	100	0	0	0	0	0	0	0	100	0	0	0	0
70810	70810	SPOT	TAT	2011-07-30 04:59:59		1		3	-21.753	35.468	12	100	0	0	0	0	0	0	0	100	0	0	0	0
70810	70810	SPOT	TAT	2011-07-30 06:00:00		1		3	-21.753	35.468	12	100	0	0	0	0	0	0	0	100	0	0	0	0
70810	70810	SPOT	TAT	2011-07-30 10:59:59		2		3	-21.753	35.468	12	100	0	0	0	0	0	10	39	51	0	0	0	0
70810	70810	SPOT	TAT	2011-07-30 16:59:59		3		3	-21.682	35.487	12	100	0	0	0	0	0	100	0	0	0	0	0	0
70810	70810	SPOT	TAT	2011-07-30 18:00:00		2		3	-21.682	35.487	12	100	0	0	0	0	0	100	0	0	0	0	0	0
70810	70810	SPOT	TAT	2011-07-30 22:59:59		1		3	-21.682	35.487	12	100	0	0	0	0	75	25	0	0	0	0	0	0
70810	70810	SPOT	TAT	2011-07-31 04:59:59		4		2	-21.681	35.488	12	99	0	0	0	0	0	49	41	9	0	0	0	0
70810	70810	SPOT	TAT	2011-07-31 06:00:00		2		2	-21.681	35.488	12	100	0	0	0	0	0	0	0	12	13	19	26	30
70810	70810	SPOT	TAT	2011-07-31 10:59:59		3		2	-21.681	35.488	12	100	0	0	0	0	0	0	47	19	11	13	4	6
70810	70810	SPOT	TAT	2011-07-31 16:59:59		4		3	-21.683	35.485	12	100	0	0	0	0	0	0	100	0	0	0	0	0
70810	70810	SPOT	TAT	2011-07-31 18:00:00		5		3	-21.683	35.485	12	100	0	0	0	0	0	67	33	0	0	0	0	0
70810	70810	SPOT	TAT	2011-07-31 22:59:59		5		3	-21.683	35.485	12	100	0	0	0	0	17	78	3	2	0	0	0	0
70810	70810	SPOT	TAT	2011-08-01 04:59:59		3		3	-21.679	35.484	12	100	0	0	0	0	0	0	0	24	24	36	16	0
70810	70810	SPOT	TAT	2011-08-01 06:00:00		2		2	-21.679	35.483	12	99	0	0	0	0	0	0	0	33	20	16	30	0
70810	70810	SPOT	TAT	2011-08-01 10:59:59		1		3	-21.681	35.488	12	99	0	0	0	0	0	0	37	61	1	0	0	0
70810	70810	SPOT	TAT	2011-08-01 16:59:59		2		3	-21.689	35.484	12	100	0	0	0	0	0	0	100	0	0	0	0	0
70810	70810	SPOT	TAT	2011-08-01 18:00:00		1		3	-21.689	35.484	12	100	0	0	0	0	0	7	93	0	0	0	0	0
70810	70810	SPOT	TAT	2011-08-01 22:59:59		2		3	-21.689	35.484	12	100	0	0	0	0	0	100	0	0	0	0	0	0
71230	71230	SPOT	TAT	2011-08-10 07:59:59		1		2	-23.874	35.546	12	99	0	0	13	0	0	2	11	30	37	6	0	0
71230	71230	SPOT	TAT	2011-08-11 07:00:00		2		3	-23.898	35.543	12	99	0	0	0	0	2	26	6	20	17	28	0	0
71230	71230	SPOT	TAT	2011-08-12 16:59:59		1					12	100	0	0	0	0	0	0	0	100	0	0	0	0
71230	71230	SPOT	TAT	2011-08-12 18:00:00		1					12	100	0	0	0	0	0	0	0	100	0	0	0	0
71230	71230	SPOT	TAT	2011-08-12 22:59:59		2					12	100	0	0	0	0	0	0	0	100	0	0	0	0
71230	71230	SPOT	TAT	2011-08-13 04:59:59		1					12	100	0	0	0	0	0	0	0	100	0	0	0	0
71230	71230	SPOT	TAT	2011-08-13 06:00:00		4					12	100	0	0	0	0	0	0	9	91	0	0	0	0
71230	71230	SPOT	TAT	2011-08-13 10:59:59		8					12	100	0	0	0	0	47	33	13	7	0	0	0	0
71230	71230	SPOT	TAT	2011-08-13 16:59:59		5		2	-23.948	35.533	12	100	0	0	0	0	0	44	24	32	0	0	0	0
71230	71230	SPOT	TAT	2011-08-13 18:00:00		9		2	-23.948	35.533	12	99	0	0	0	0	20	24	12	43	0	0	0	0
71230	71230	SPOT	TAT	2011-08-13 22:59:59		8		2	-23.948	35.533	12	100	0	0	0	0	13	30	9	48	0	0	0	0
71230	71230	SPOT	TAT	2011-08-14 04:59:59		9		2	-23.948	35.533	12	100	0	0	0	0	0	0	0	100	0	0	0	0
71230	71230	SPOT	TAT	2011-08-14 06:00:00		8		2	-23.948	35.533	12	100	0	0	0	0	0	0	0	100	0	0	0	0
71230	71230	SPOT	TAT	2011-08-14 10:59:59		8		2	-23.948	35.533	12	100	0	0	0	0	0	0	0	100	0	0	0	0
71230	71230	SPOT	TAT	2011-08-14 16:59:59		3		3	-23.966	35.529	12	100	0	0	0	0	0	0	0	100	0	0	0	0
71230	71230	SPOT	TAT	2011-08-14 18:00:00		6		1	-23.974	35.53	12	100	0	0	0	0	0	0	0	100	0	0	0	0
71230	71230	SPOT	TAT	2011-08-14 22:59:59		3		1	-24.007	35.526	12	100	0	0	0	0	0	0	37	63	0	0	0	0
71230	71230	SPOT	TAT	2011-08-15 04:59:59		3		3	-24.179	35.466	12	100	0	0	0	0	0	0	19	81	0	0	0	0
71230	71230	SPOT	TAT	2011-08-15 06:00:00		2		3	-24.179	35.466	12	100	0	0	0	0	0	0	8	92	0	0	0	0
71230	71230	SPOT	TAT	2011-08-17 06:00:00		1					12	100	0	0	0	0	0	7	93	0	0	0	0	0
71230	71230	SPOT	TAT	2011-08-17 10:59:59		1					12	100	0	0	0	0	0	81	5	14	0	0	0	0
71230	71230	SPOT	TAT	2011-08-17 16:59:59		1					12	100	0	0	0	0	0	0	0	100	0	0	0	0
71230	71230	SPOT	TAT	2011-08-17 18:00:00		11					12	100	0	0	0	0	0	5	18	77	0	0	0	0
71230	71230	SPOT	TAT	2011-08-17 22:59:59		9					12	100	0	0	0	16	3	9	17	55	0	0	0	0
71230	71230	SPOT	TAT	2011-08-18 04:59:59		12					12	100	0	0	0	100	0	0	0	0	0	0	0	0
71230	71230	SPOT	TAT	2011-08-18 06:00:00		7					12	100	0	0	0	100	0	0	0	0	0	0	0	0
71230	71230	SPOT	TAT	2011-08-18 10:59:59		7		1	-26.503	34.116	12	100	0	0	0	33	3	3	4	57	0	0	0	0
71230	71230	SPOT	TAT	2011-08-18 13:00:00		1		1	-26.503	34.116	12	98	15	3	2	10	18	19	10	2	13	3	1	2
71230	71230	SPOT	TAT	2011-08-18 16:59:59		8		1	-26.503	34.116	12	100	0	0	0	0	0	0	0	100	0	0	0	0
71230	71230	SPOT	TAT	2011-08-18 18:00:00		6		1	-26.503	34.116	12	100	0	0	0	0	0	0	0	100	0	0	0	0
71230	71230	SPOT	TAT	2011-08-18 22:59:59		6		1	-26.503	34.116	12	99	0	0	0	1	11	8	10	69	0	0	0	0
71230	71230	SPOT	TAT	2011-08-19 04:59:59		9		1	-26.503	34.116	12	100	0	0	0	100	0	0	0	0	0	0	0	0
71230	71230	SPOT	TAT	2011-08-19 06:00:00		9		1	-26.503	34.116	12	100	0	0	0	46	1	2	8	43	0	0	0	0
71230	71230	SPOT	TAT	2011-08-19 10:59:59		1		2	-26.592	34.085	12	100	0	0	0	7	3	3	5	82	0	0	0	0
71230	71230	SPOT	TAT	2011-08-19 16:59:59		1		1	-26.707	33.974	12	100	0	0	0	0	0	0	0	100	0	0	0	0
71230	71230	SPOT	TAT	2011-08-19 18:00:00		18		2	-26.748	33.912	12	100	0	0	0	0	0	0	23	77	0	0	0	0
71230	71230	SPOT	TAT	2011-08-19 22:59:59		21		2	-26.869	33.755	12	99	0	0	0	11	2	1	72	13	0	0	0	0
71230	71230	SPOT	TAT	2011-08-20 04:59:59		20		2	-26.975	33.625	12	100	0	0	0	22	6	11	61	0	0	0	0	0
71230	71230	SPOT	TAT	2011-08-20 06:00:00		18		2	-26.975	33.625	12	100	0	0	0	36	3	3	36	22	0	0	0	0
71230	71230	SPOT	TAT	2011-08-20 10:59:59		11		2	-27.006	33.462	12	101	0	0	15	5	2	3	9	67	0	0	0	0
71230	71230	SPOT	TAT	2011-08-20 16:59:59		14		1	-27.019	33.319	12	100	0	0	0	0	0	0	100	0	0	0	0	0
71230	71230	SPOT	TAT	2011-08-20 18:00:00		9		2	-27.025	33.34	12	100	0	0	0	0	0	0	99	1	0	0	0	0
71230	71230	SPOT	TAT	2011-08-20 22:59:59		5		3	-27.071	33.307	12	100	0	0	0	0	0	0	12	88	0	0	0	0
71230	71230	SPOT	TAT	2011-08-21 04:59:59		7		2	-27.111	33.275	12	100	0	0	0	0	0	0	0	100	0	0	0	0
71230	71230	SPOT	TAT	2011-08-21 06:00:00		8		2	-27.111	33.275	12	100	0	0	0	0	0	0	0	100	0	0	0	0
71230	71230	SPOT	TAT	2011-08-21 10:59:59		9		2	-27.111	33.275	12	100	0	0	0	0	0	0	0	100	0	0	0	0
71230	71230	SPOT	TAT	2011-08-21 16:59:59		9		2	-27.269	33.312	12	101	0	0	16	13	5	5	6	56	0	0	0	0
71230	71230	SPOT	TAT	2011-08-21 18:00:00		10		2	-27.269	33.312	12	100	0	0	8	3	1	2	23	63	0	0	0	0
71230	71230	SPOT	TAT	2011-08-21 22:59:59		3		2	-27.269	33.312	12	100	0	0	0	0	0	0	12	88	0	0	0	0
71230	71230	SPOT	TAT	2011-08-22 04:59:59		3		2	-27.33	33.349	12	100	0	0	0	0	0	0	7	93	0	0	0	0
71230	71230	SPOT	TAT	2011-08-22 06:00:00		3		2	-27.33	33.349	12	100	0	0	0	0	0	0	0	100	0	0	0	0
71230	71230	SPOT	TAT	2011-08-22 10:59:59		2		2	-27.33	33.349	12	100	0	0	0	0	0	0	19	81	0	0	0	0
71230	71230	SPOT	TAT	2011-08-22 16:59:59		3		3	-27.657	33.476	12	100	0	0	0	0	0	0	99	1	0	0	0	0
71230	71230	SPOT	TAT	2011-08-22 18:00:00		2		3	-27.657	33.476	12	100	0	0	0	0	0	0	100	0	0	0	0	0
71230	71230	SPOT	TAT	2011-08-21 22:59:59		6		2	-27.269	33.312	12	100	0	0	0	0	0	0	12	88	0	0	0	0
71230	71230	SPOT	TAT	2011-08-22 04:59:59		6		2	-27.33	33.349	12	100	0	0	0	0	0	0	7	93	0	0	0	0
71230	71230	SPOT	TAT	2011-08-22 06:00:00		7		2	-27.33	33.349	12	100	0	0	0	0	0	0	0	100	0	0	0	0
71230	71230	SPOT	TAT	2011-08-22 10:59:59		4		2	-27.33	33.349	12	100	0	0	0	0	0	0	19	81	0	0	0	0
71230	71230	SPOT	TAT	2011-08-22 16:59:59		8		3	-27.657	33.476	12	100	0	0	0	0	0	0	99	1	0	0	0	0
71230	71230	SPOT	TAT	2011-08-22 18:00:00		5		3	-27.657	33.476	12	100	0	0	0	0	0	0	100	0	0	0	0	0
71230	71230	SPOT	TAT	2011-08-22 22:59:59		5		3	-27.657	33.476	12	100	0	0	0	0	0	0	98	2	0	0	0	0
71230	71230	SPOT	TAT	2011-08-23 04:59:59		4		3	-27.723	33.522	12	100	0	0	0	0	0	0	94	6	0	0	0	0
71230	71230	SPOT	TAT	2011-08-23 06:00:00		4		3	-27.723	33.522	12	100	0	0	0	0	0	0	15	85	0	0	0	0
71230	71230	SPOT	TAT	2011-08-23 10:59:59		4		3	-27.723	33.522	12	100	0	0	0	0	0	0	44	56	0	0	0	0
71230	71230	SPOT	TAT	2011-08-23 16:59:59		2		2	-28.267	33.542	12	100	0	0	0	0	0	0	100	0	0	0	0	0
71230	71230	SPOT	TAT	2011-08-23 18:00:00		5		2	-28.267	33.542	12	100	0	0	0	0	0	0	100	0	0	0	0	0
71230	71230	SPOT	TAT	2011-08-23 22:59:59		9		2	-28.267	33.542	12	100	0	0	0	3	2	3	40	52	0	0	0	0
71230	71230	SPOT	TAT	2011-08-24 04:59:59		7		1	-28.334	33.477	12	100	0	0	0	0	0	0	40	60	0	0	0	0
71230	71230	SPOT	TAT	2011-08-24 06:00:00		7		1	-28.334	33.477	12	100	0	0	0	0	0	0	0	100	0	0	0	0
71230	71230	SPOT	TAT	2011-08-24 10:59:59		5		1	-28.334	33.477	12	100	0	0	0	0	0	0	37	63	0	0	0	0
71230	71230	SPOT	TAT	2011-08-24 16:59:59		8		2	-28.402	32.956	12	100	0	0	0	0	0	0	100	0	0	0	0	0
71230	71230	SPOT	TAT	2011-08-24 18:00:00		9		2	-28.402	32.956	12	100	0	0	0	0	0	0	100	0	0	0	0	0
71230	71230	SPOT	TAT	2011-08-24 22:59:59		6		2	-28.402	32.956	12	100	0	0	0	0	0	0	100	0	0	0	0	0
71230	71230	SPOT	TAT	2011-08-25 04:59:59		7		3	-28.371	32.906	12	100	0	0	0	0	0	0	100	0	0	0	0	0
71230	71230	SPOT	TAT	2011-08-25 06:00:00		9		3	-28.371	32.906	12	100	0	0	0	0	0	0	9	91	0	0	0	0
71230	71230	SPOT	TAT	2011-08-25 10:59:59		11		3	-28.371	32.906	12	100	0	0	0	0	0	0	34	66	0	0	0	0
71230	71230	SPOT	TAT	2011-08-25 16:59:59		11		3	-28.256	32.86	12	100	0	0	0	0	0	0	100	0	0	0	0	0
71230	71230	SPOT	TAT	2011-08-25 18:00:00		10		3	-28.256	32.86	12	100	0	0	0	0	0	0	100	0	0	0	0	0
71230	71230	SPOT	TAT	2011-08-25 22:59:59		8		3	-28.256	32.86	12	100	0	0	0	0	0	0	97	3	0	0	0	0
71230	71230	SPOT	TAT	2011-08-26 04:59:59		8		3	-28.265	32.899	12	100	0	0	0	0	0	0	7	93	0	0	0	0
71230	71230	SPOT	TAT	2011-08-26 06:00:00		10		3	-28.265	32.899	12	100	0	0	0	0	0	0	0	100	0	0	0	0
71230	71230	SPOT	TAT	2011-08-26 10:59:59		12		3	-28.265	32.899	12	100	0	0	0	0	0	0	34	66	0	0	0	0
71230	71230	SPOT	TAT	2011-08-26 16:59:59		8		3	-28.39	33.073	12	100	0	0	0	0	0	0	100	0	0	0	0	0
71230	71230	SPOT	TAT	2011-08-26 18:00:00		8		3	-28.39	33.073	12	100	0	0	0	0	0	0	100	0	0	0	0	0
71230	71230	SPOT	TAT	2011-08-26 22:59:59		5		3	-28.39	33.073	12	100	0	0	0	0	0	0	95	5	0	0	0	0
71230	71230	SPOT	TAT	2011-08-27 04:59:59		5		2	-28.461	33.071	12	100	0	0	0	0	0	0	85	15	0	0	0	0
71230	71230	SPOT	TAT	2011-08-27 06:00:00		3		2	-28.461	33.071	12	100	0	0	0	0	0	0	100	0	0	0	0	0
71230	71230	SPOT	TAT	2011-08-27 10:59:59		4		2	-28.461	33.071	12	100	0	0	0	0	0	0	100	0	0	0	0	0
71230	71230	SPOT	TAT	2011-08-27 16:59:59		4		2	-28.558	32.862	12	100	0	0	0	0	0	0	100	0	0	0	0	0
71230	71230	SPOT	TAT	2011-08-27 18:00:00		5		2	-28.558	32.862	12	100	0	0	0	0	0	0	100	0	0	0	0	0
71230	71230	SPOT	TAT	2011-08-27 22:59:59		1		2	-28.558	32.862	12	100	0	0	0	0	0	0	100	0	0	0	0	0
71230	71230	SPOT	TAT	2011-08-28 04:59:59		8		1	-28.543	32.8	12	100	0	0	0	0	0	0	100	0	0	0	0	0
71230	71230	SPOT	TAT	2011-08-28 06:00:00		7		2	-28.544	32.809	12	100	0	0	0	0	0	0	100	0	0	0	0	0
71230	71230	SPOT	TAT	2011-08-28 10:59:59		8		2	-28.544	32.809	12	100	0	0	0	0	0	0	100	0	0	0	0	0
71230	71230	SPOT	TAT	2011-08-28 16:59:59		7		3	-28.47	32.783	12	100	0	0	0	0	0	0	100	0	0	0	0	0
71230	71230	SPOT	TAT	2011-08-28 18:00:00		8		3	-28.47	32.783	12	100	0	0	0	0	0	0	100	0	0	0	0	0
71230	71230	SPOT	TAT	2011-08-28 22:59:59		9		3	-28.47	32.783	12	100	0	0	0	0	0	0	100	0	0	0	0	0
71230	71230	SPOT	TAT	2011-08-29 04:59:59		10		3	-28.499	32.796	12	100	0	0	0	0	0	0	100	0	0	0	0	0
71230	71230	SPOT	TAT	2011-08-29 06:00:00		10		2	-28.499	32.799	12	100	0	0	0	0	0	0	100	0	0	0	0	0
71230	71230	SPOT	TAT	2011-08-29 10:59:59		8		2	-28.499	32.799	12	100	0	0	0	0	0	0	100	0	0	0	0	0
71230	71230	SPOT	TAT	2011-08-29 16:59:59		9		2	-28.839	32.761	12	100	0	0	0	0	0	0	100	0	0	0	0	0
71230	71230	SPOT	TAT	2011-08-29 18:00:00		6		2	-28.839	32.761	12	100	0	0	0	0	0	0	100	0	0	0	0	0
71230	71230	SPOT	TAT	2011-08-29 22:59:59		9		2	-28.839	32.761	12	100	0	0	0	0	0	0	100	0	0	0	0	0
71230	71230	SPOT	TAT	2011-08-30 04:59:59		7		3	-28.903	32.701	12	100	0	0	0	0	0	0	100	0	0	0	0	0
71230	71230	SPOT	TAT	2011-08-30 06:00:00		9		3	-28.903	32.701	12	100	0	0	0	0	0	0	100	0	0	0	0	0
71230	71230	SPOT	TAT	2011-08-30 10:59:59		7		3	-28.903	32.701	12	100	0	0	0	0	0	0	100	0	0	0	0	0
71230	71230	SPOT	TAT	2011-08-30 16:59:59		6		2	-29.434	32.261	12	100	0	0	0	0	0	0	100	0	0	0	0	0
71230	71230	SPOT	TAT	2011-08-30 18:00:00		8		2	-29.434	32.261	12	100	0	0	0	0	0	0	100	0	0	0	0	0
71230	71230	SPOT	TAT	2011-08-30 22:59:59		6		2	-29.434	32.261	12	100	0	0	0	0	0	0	100	0	0	0	0	0
71230	71230	SPOT	TAT	2011-08-31 04:59:59		6		2	-29.55	32.181	12	100	0	0	0	0	0	0	100	0	0	0	0	0
71230	71230	SPOT	TAT	2011-08-31 06:00:00		8		2	-29.55	32.181	12	100	0	0	0	0	0	0	81	19	0	0	0	0
71230	71230	SPOT	TAT	2011-08-31 10:59:59		7		2	-29.55	32.181	12	100	0	0	0	0	0	0	38	62	0	0	0	0
71230	71230	SPOT	TAT	2011-08-31 16:59:59		7		3	-30.063	31.509	12	100	0	0	0	0	0	0	100	0	0	0	0	0
71230	71230	SPOT	TAT	2011-08-31 18:00:00		7		3	-30.063	31.509	12	100	0	0	0	0	0	0	100	0	0	0	0	0
71230	71230	SPOT	TAT	2011-08-31 22:59:59		1		3	-30.063	31.509	12	100	0	0	0	0	0	0	100	0	0	0	0	0
71230	71230	SPOT	TAT	2011-09-01 04:59:59		9		1	-30.223	31.391	12	101	0	0	0	0	0	0	68	33	0	0	0	0
71230	71230	SPOT	TAT	2011-09-01 06:00:00		7		3	-30.23	31.386	12	100	0	0	0	0	0	0	2	98	0	0	0	0
71230	71230	SPOT	TAT	2011-09-01 10:59:59		6		3	-30.23	31.386	12	100	0	0	0	0	0	0	46	54	0	0	0	0
71230	71230	SPOT	TAT	2011-09-01 16:59:59		8		2	-30.956	30.92	12	100	0	0	0	0	0	0	100	0	0	0	0	0
71230	71230	SPOT	TAT	2011-09-01 18:00:00		9		2	-30.956	30.92	12	100	0	0	0	0	0	0	100	0	0	0	0	0
71230	71230	SPOT	TAT	2011-09-01 22:59:59		8		2	-30.956	30.92	12	100	0	0	0	0	0	0	100	0	0	0	0	0
71230	71230	SPOT	TAT	2011-09-02 04:59:59		10		3	-31.15	30.808	12	100	0	0	0	0	0	0	100	0	0	0	0	0
71230	71230	SPOT	TAT	2011-09-02 06:00:00		7		2	-31.164	30.801	12	100	0	0	0	0	0	0	29	71	0	0	0	0
71230	71230	SPOT	TAT	2011-09-02 10:59:59		6		2	-31.164	30.801	12	100	0	0	0	0	0	0	61	39	0	0	0	0
71230	71230	SPOT	TAT	2011-09-02 16:59:59		8		2	-31.684	29.887	12	100	0	0	0	0	0	0	100	0	0	0	0	0
71230	71230	SPOT	TAT	2011-09-02 18:00:00		7		2	-31.684	29.887	12	100	0	0	0	0	0	0	100	0	0	0	0	0
71230	71230	SPOT	TAT	2011-09-02 22:59:59		5		2	-31.684	29.887	12	100	0	0	0	0	0	0	100	0	0	0	0	0
71230	71230	SPOT	TAT	2011-09-03 04:59:59		3		2	-31.745	29.755	12	100	0	0	0	0	0	0	100	0	0	0	0	0
71230	71230	SPOT	TAT	2011-09-03 06:00:00		4		2	-31.745	29.755	12	100	0	0	0	0	0	0	100	0	0	0	0	0
71230	71230	SPOT	TAT	2011-09-03 10:59:59		4		2	-31.745	29.755	12	100	0	0	0	0	0	0	100	0	0	0	0	0
71230	71230	SPOT	TAT	2011-09-03 16:59:59		5		2	-32.346	29.071	12	100	0	0	0	0	0	0	100	0	0	0	0	0
71230	71230	SPOT	TAT	2011-09-03 18:00:00		4		2	-32.346	29.071	12	100	0	0	0	0	0	0	100	0	0	0	0	0
71230	71230	SPOT	TAT	2011-09-03 22:59:59		8		2	-32.346	29.071	12	100	0	0	0	0	0	0	100	0	0	0	0	0
71230	71230	SPOT	TAT	2011-09-04 04:59:59		12		2	-32.478	28.961	12	100	0	0	0	0	0	0	100	0	0	0	0	0
71230	71230	SPOT	TAT	2011-09-04 06:00:00		14		2	-32.478	28.961	12	100	0	0	0	0	0	0	100	0	0	0	0	0
71230	71230	SPOT	TAT	2011-09-04 10:59:59		13		2	-32.478	28.961	12	100	0	0	0	0	0	0	100	0	0	0	0	0
71230	71230	SPOT	TAT	2011-09-04 16:59:59		11		3	-32.547	28.685	12	100	0	0	0	0	0	0	100	0	0	0	0	0
71230	71230	SPOT	TAT	2011-09-04 18:00:00		11		3	-32.547	28.685	12	100	0	0	0	0	0	0	100	0	0	0	0	0
71230	71230	SPOT	TAT	2011-09-04 22:59:59		7		3	-32.547	28.685	12	100	0	0	0	0	0	53	47	0	0	0	0	0
71230	71230	SPOT	TAT	2011-09-05 04:59:59		7		2	-32.523	28.756	12	100	0	0	0	0	0	100	0	0	0	0	0	0
71230	71230	SPOT	TAT	2011-09-05 06:00:00		4		2	-32.521	28.75	12	100	0	0	0	0	0	34	66	0	0	0	0	0
71230	71230	SPOT	TAT	2011-09-05 10:59:59		6		2	-32.521	28.75	12	100	0	0	0	0	0	25	75	0	0	0	0	0
71230	71230	SPOT	TAT	2011-09-05 16:59:59		3		3	-32.696	28.606	12	100	0	0	0	0	0	100	0	0	0	0	0	0
71230	71230	SPOT	TAT	2011-09-05 18:00:00		3		3	-32.696	28.606	12	100	0	0	0	0	0	100	0	0	0	0	0	0
71230	71230	SPOT	TAT	2011-09-05 22:59:59		1		3	-32.696	28.606	12	100	0	0	0	0	0	100	0	0	0	0	0	0
71230	71230	SPOT	TAT	2011-09-06 04:59:59		12		3	-32.78	28.548	12	100	0	0	0	0	0	100	0	0	0	0	0	0
71230	71230	SPOT	TAT	2011-09-06 06:00:00		9		3	-32.796	28.535	12	100	0	0	0	0	0	74	26	0	0	0	0	0
71230	71230	SPOT	TAT	2011-09-06 10:59:59		8		3	-32.796	28.535	12	100	0	0	0	0	0	0	100	0	0	0	0	0
71230	71230	SPOT	TAT	2011-09-06 16:59:59		8		2	-33.193	28.079	12	100	0	0	0	0	0	0	100	0	0	0	0	0
71230	71230	SPOT	TAT	2011-09-06 18:00:00		11		2	-33.193	28.079	12	100	0	0	0	0	0	17	83	0	0	0	0	0
71230	71230	SPOT	TAT	2011-09-06 22:59:59		15		2	-33.193	28.079	12	100	0	0	0	0	0	10	90	0	0	0	0	0
71230	71230	SPOT	TAT	2011-09-07 04:59:59		12		2	-33.29	27.975	12	100	0	0	0	0	0	1	99	0	0	0	0	0
71230	71230	SPOT	TAT	2011-09-07 06:00:00		12		2	-33.291	27.976	12	100	0	0	0	0	0	0	100	0	0	0	0	0
71230	71230	SPOT	TAT	2011-09-07 10:59:59		9		2	-33.291	27.976	12	100	0	0	0	0	0	0	100	0	0	0	0	0
71230	71230	SPOT	TAT	2011-09-07 16:59:59		10		1	-33.855	27.4	12	100	0	0	0	0	0	0	100	0	0	0	0	0
71230	71230	SPOT	TAT	2011-09-07 18:00:00		10		1	-33.855	27.4	12	100	0	0	0	0	0	0	100	0	0	0	0	0
71230	71230	SPOT	TAT	2011-09-07 22:59:59		9		1	-33.855	27.4	12	100	0	0	0	0	0	0	100	0	0	0	0	0
71230	71230	SPOT	TAT	2011-09-08 04:59:59		10		3	-34.014	27.126	12	100	0	0	0	0	0	0	100	0	0	0	0	0
71230	71230	SPOT	TAT	2011-09-08 06:00:00		7		3	-34.014	27.126	12	100	0	0	0	0	0	0	100	0	0	0	0	0
71230	71230	SPOT	TAT	2011-09-08 10:59:59		8		3	-34.014	27.126	12	100	0	0	0	0	0	0	100	0	0	0	0	0
71230	71230	SPOT	TAT	2011-09-08 16:59:59		9		2	-34.456	26.223	12	100	0	0	0	0	0	0	100	0	0	0	0	0
71230	71230	SPOT	TAT	2011-09-08 18:00:00		10		2	-34.456	26.223	12	100	0	0	0	0	0	0	100	0	0	0	0	0
71230	71230	SPOT	TAT	2011-09-08 22:59:59		10		2	-34.456	26.223	12	100	0	0	0	0	0	0	100	0	0	0	0	0
71230	71230	SPOT	TAT	2011-09-09 04:59:59		12		3	-34.498	26.033	12	100	0	0	0	0	0	0	100	0	0	0	0	0
71230	71230	SPOT	TAT	2011-09-09 06:00:00		10		3	-34.498	26.033	12	100	0	0	0	0	0	0	100	0	0	0	0	0
71230	71230	SPOT	TAT	2011-09-09 10:59:59		11		3	-34.498	26.033	12	100	0	0	0	0	0	21	79	0	0	0	0	0
71230	71230	SPOT	TAT	2011-09-09 16:59:59		9		2	-34.634	25.559	12	100	0	0	0	0	0	100	0	0	0	0	0	0
71230	71230	SPOT	TAT	2011-09-09 18:00:00		7		2	-34.634	25.559	12	100	0	0	0	0	0	100	0	0	0	0	0	0
71230	71230	SPOT	TAT	2011-09-09 22:59:59		7		2	-34.634	25.559	12	100	0	0	0	0	0	100	0	0	0	0	0	0
71230	71230	SPOT	TAT	2011-09-10 04:59:59		7		2	-34.634	25.495	12	100	0	0	0	0	0	100	0	0	0	0	0	0
71230	71230	SPOT	TAT	2011-09-10 06:00:00		6		2	-34.634	25.495	12	100	0	0	0	0	0	69	31	0	0	0	0	0
71230	71230	SPOT	TAT	2011-09-10 10:59:59		7		2	-34.634	25.495	12	100	0	0	0	0	0	83	17	0	0	0	0	0
71230	71230	SPOT	TAT	2011-09-10 16:59:59		8		2	-34.56	25.27	12	100	0	0	0	0	0	100	0	0	0	0	0	0
71230	71230	SPOT	TAT	2011-09-10 18:00:00		8		2	-34.56	25.27	12	100	0	0	0	0	0	100	0	0	0	0	0	0
71230	71230	SPOT	TAT	2011-09-10 22:59:59		7		2	-34.56	25.27	12	100	0	0	0	0	0	100	0	0	0	0	0	0
71230	71230	SPOT	TAT	2011-09-11 04:59:59		6		3	-34.571	25.244	12	100	0	0	0	0	0	100	0	0	0	0	0	0
71230	71230	SPOT	TAT	2011-09-11 06:00:00		5		3	-34.571	25.244	12	100	0	0	0	0	0	59	41	0	0	0	0	0
71230	71230	SPOT	TAT	2011-09-11 10:59:59		3		3	-34.571	25.244	12	100	0	0	0	0	0	53	47	0	0	0	0	0
71230	71230	SPOT	TAT	2011-09-11 16:59:59		3		3	-34.524	25.106	12	100	0	0	0	0	0	100	0	0	0	0	0	0
71230	71230	SPOT	TAT	2011-09-11 18:00:00		2		3	-34.524	25.106	12	100	0	0	0	0	0	100	0	0	0	0	0	0
71230	71230	SPOT	TAT	2011-09-11 22:59:59		6		3	-34.524	25.106	12	100	0	0	0	0	0	100	0	0	0	0	0	0
71230	71230	SPOT	TAT	2011-09-12 04:59:59		7		3	-34.546	25.106	12	100	0	0	0	0	0	100	0	0	0	0	0	0
71230	71230	SPOT	TAT	2011-09-12 06:00:00		10		1	-34.548	25.096	12	100	0	0	0	0	0	37	63	0	0	0	0	0
71230	71230	SPOT	TAT	2011-09-12 10:59:59		10		1	-34.549	25.109	12	100	0	0	0	0	0	60	40	0	0	0	0	0
71230	71230	SPOT	TAT	2011-09-12 16:59:59		10		2	-34.457	24.967	12	100	0	0	0	0	0	100	0	0	0	0	0	0
71230	71230	SPOT	TAT	2011-09-12 18:00:00		9		2	-34.457	24.967	12	100	0	0	0	0	0	100	0	0	0	0	0	0
71230	71230	SPOT	TAT	2011-09-12 22:59:59		12		2	-34.457	24.967	12	100	0	0	0	0	0	100	0	0	0	0	0	0
71230	71230	SPOT	TAT	2011-09-13 04:59:59		13		1	-34.458	24.952	12	100	0	0	0	0	0	100	0	0	0	0	0	0
71230	71230	SPOT	TAT	2011-09-13 06:00:00		12		3	-34.458	24.954	12	100	0	0	0	0	0	100	0	0	0	0	0	0
71230	71230	SPOT	TAT	2011-09-13 10:59:59		12		3	-34.458	24.954	12	100	0	0	0	0	0	100	0	0	0	0	0	0
71230	71230	SPOT	TAT	2011-09-13 16:59:59		10		2	-34.376	24.833	12	100	0	0	0	0	0	100	0	0	0	0	0	0
71230	71230	SPOT	TAT	2011-09-13 18:00:00		7		2	-34.376	24.833	12	100	0	0	0	0	0	100	0	0	0	0	0	0
71230	71230	SPOT	TAT	2011-09-13 22:59:59		10		2	-34.376	24.833	12	100	0	0	0	0	0	100	0	0	0	0	0	0
71230	71230	SPOT	TAT	2011-09-14 04:59:59		10		2	-34.382	24.835	12	100	0	0	0	0	0	100	0	0	0	0	0	0
71230	71230	SPOT	TAT	2011-09-14 06:00:00		9		2	-34.38	24.833	12	100	0	0	0	0	0	100	0	0	0	0	0	0
71230	71230	SPOT	TAT	2011-09-14 10:59:59		7		2	-34.38	24.833	12	100	0	0	0	0	0	100	0	0	0	0	0	0
71230	71230	SPOT	TAT	2011-09-14 16:59:59		8		2	-34.39	24.543	12	100	0	0	0	0	0	100	0	0	0	0	0	0
71230	71230	SPOT	TAT	2011-09-14 18:00:00		10		2	-34.39	24.543	12	100	0	0	0	0	0	100	0	0	0	0	0	0
71230	71230	SPOT	TAT	2011-09-14 22:59:59		5		2	-34.39	24.543	12	100	0	0	0	0	0	100	0	0	0	0	0	0
71230	71230	SPOT	TAT	2011-09-15 04:59:59		6		3	-34.396	24.516	12	100	0	0	0	0	0	100	0	0	0	0	0	0
71230	71230	SPOT	TAT	2011-09-15 06:00:00		4		3	-34.394	24.517	12	100	0	0	0	0	0	100	0	0	0	0	0	0
71230	71230	SPOT	TAT	2011-09-15 10:59:59		5		3	-34.394	24.517	12	100	0	0	0	0	16	84	0	0	0	0	0	0
71230	71230	SPOT	TAT	2011-09-15 16:59:59		6		1	-34.263	24.52	12	100	0	0	0	0	62	38	0	0	0	0	0	0
71230	71230	SPOT	TAT	2011-09-15 18:00:00		4		1	-34.263	24.52	12	100	0	0	0	0	32	68	0	0	0	0	0	0
71230	71230	SPOT	TAT	2011-09-15 22:59:59		1		1	-34.263	24.52	12	100	0	0	0	0	14	86	0	0	0	0	0	0
71230	71230	SPOT	TAT	2011-09-16 04:59:59		2		3	-34.251	24.529	12	100	0	0	0	0	100	0	0	0	0	0	0	0
71230	71230	SPOT	TAT	2011-09-16 06:00:00		1		3	-34.251	24.529	12	100	0	0	0	0	85	15	0	0	0	0	0	0
71230	71230	SPOT	TAT	2011-09-16 10:59:59		2		3	-34.251	24.529	12	100	0	0	0	0	46	54	0	0	0	0	0	0
71230	71230	SPOT	TAT	2011-09-16 16:59:59		2		1	-34.202	24.259	12	100	0	0	0	0	100	0	0	0	0	0	0	0
71230	71230	SPOT	TAT	2011-09-16 18:00:00		14		1	-34.203	24.266	12	100	0	0	0	0	100	0	0	0	0	0	0	0
71230	71230	SPOT	TAT	2011-09-16 22:59:59		12		1	-34.203	24.266	12	100	0	0	0	0	100	0	0	0	0	0	0	0
71230	71230	SPOT	TAT	2011-09-17 04:59:59		13		3	-34.191	24.261	12	100	0	0	0	0	87	13	0	0	0	0	0	0
71230	71230	SPOT	TAT	2011-09-17 06:00:00		5		2	-34.182	24.253	12	100	0	0	0	0	0	84	16	0	0	0	0	0
71230	71230	SPOT	TAT	2011-09-17 10:59:59		8		3	-34.179	24.253	12	100	0	0	0	0	0	59	41	0	0	0	0	0
71230	71230	SPOT	TAT	2011-09-17 16:59:59		8		3	-34.147	24.154	12	100	0	0	0	0	0	100	0	0	0	0	0	0
71230	71230	SPOT	TAT	2011-09-17 18:00:00		7		3	-34.147	24.154	12	100	0	0	0	0	0	100	0	0	0	0	0	0
71230	71230	SPOT	TAT	2011-09-17 22:59:59		3		3	-34.147	24.154	12	100	0	0	0	0	97	3	0	0	0	0	0	0
71230	71230	SPOT	TAT	2011-09-18 04:59:59		6		3	-34.132	24.154	12	100	0	0	0	0	100	0	0	0	0	0	0	0
71230	71230	SPOT	TAT	2011-09-18 06:00:00		6		3	-34.132	24.154	12	100	0	0	0	0	100	0	0	0	0	0	0	0
71230	71230	SPOT	TAT	2011-09-18 10:59:59		8		3	-34.132	24.154	12	100	0	0	0	0	53	47	0	0	0	0	0	0
71230	71230	SPOT	TAT	2011-09-18 16:59:59		6		2	-34.107	24.338	12	100	0	0	0	0	100	0	0	0	0	0	0	0
71230	71230	SPOT	TAT	2011-09-18 18:00:00		9		2	-34.107	24.338	12	100	0	0	0	0	100	0	0	0	0	0	0	0
71230	71230	SPOT	TAT	2011-09-18 22:59:59		4		2	-34.107	24.338	12	100	0	0	0	0	100	0	0	0	0	0	0	0
71230	71230	SPOT	TAT	2011-09-19 04:59:59		5		2	-34.117	24.385	12	100	0	0	0	0	100	0	0	0	0	0	0	0
71230	71230	SPOT	TAT	2011-09-19 06:00:00		5		2	-34.117	24.385	12	100	0	0	0	0	63	22	7	8	0	0	0	0
71230	71230	SPOT	TAT	2011-09-19 10:59:59		5		2	-34.117	24.385	12	100	0	0	0	21	11	17	13	37	1	0	0	0
71230	71230	SPOT	TAT	2011-09-19 16:59:59		5		3	-34.125	24.426	12	100	0	0	0	100	0	0	0	0	0	0	0	0
71230	71230	SPOT	TAT	2011-09-19 18:00:00		4		3	-34.125	24.426	12	100	0	0	0	100	0	0	0	0	0	0	0	0
71230	71230	SPOT	TAT	2011-09-19 22:59:59		5		3	-34.125	24.426	12	100	0	0	0	100	0	0	0	0	0	0	0	0
71230	71230	SPOT	TAT	2011-09-20 04:59:59		5		2	-34.124	24.421	12	100	0	0	0	100	0	0	0	0	0	0	0	0
71230	71230	SPOT	TAT	2011-09-20 06:00:00		3		2	-34.124	24.421	12	100	0	0	0	24	5	13	13	21	14	10	0	0
71230	71230	SPOT	TAT	2011-09-20 10:59:59		1		2	-34.126	24.424	12	99	0	0	0	0	13	4	3	6	7	37	29	0
71230	71230	SPOT	TAT	2011-09-20 16:59:59		1		3	-34.125	24.425	12	100	0	0	0	63	37	0	0	0	0	0	0	0
71230	71230	SPOT	TAT	2011-09-20 22:59:59		1		3	-34.125	24.425	12	100	0	0	0	100	0	0	0	0	0	0	0	0
71230	71230	SPOT	TAT	2011-09-21 04:59:59		1		3	-34.125	24.424	12	100	0	0	0	100	0	0	0	0	0	0	0	0
71230	71230	SPOT	TAT	2011-09-21 06:00:00		4		2	-34.125	24.426	12	100	0	0	0	16	19	22	6	16	3	18	0	0
71230	71230	SPOT	TAT	2011-09-21 10:59:59		5		3	-34.125	24.424	12	100	0	0	0	2	10	8	4	4	2	9	13	48
71230	71230	SPOT	TAT	2011-09-21 16:59:59		8		3	-34.126	24.427	12	100	0	0	0	100	0	0	0	0	0	0	0	0
71230	71230	SPOT	TAT	2011-09-21 18:00:00		8		3	-34.126	24.427	12	100	0	0	0	100	0	0	0	0	0	0	0	0
71230	71230	SPOT	TAT	2011-09-21 22:59:59		7		3	-34.126	24.427	12	100	0	0	2	98	0	0	0	0	0	0	0	0
71230	71230	SPOT	TAT	2011-09-22 04:59:59		4		3	-34.126	24.427	12	100	0	0	0	100	0	0	0	0	0	0	0	0
71230	71230	SPOT	TAT	2011-09-22 06:00:00		1		3	-34.126	24.426	12	101	0	0	0	22	3	3	7	9	6	38	13	0
71230	71230	SPOT	TAT	2011-09-22 10:59:59		1		2	-34.129	24.419	12	100	0	0	0	0	11	18	3	9	8	22	18	11
71230	71230	SPOT	TAT	2011-09-22 16:59:59		3		3	-34.126	24.426	12	100	0	0	0	0	100	0	0	0	0	0	0	0
71230	71230	SPOT	TAT	2011-09-22 18:00:00		3		3	-34.126	24.426	12	100	0	0	0	48	52	0	0	0	0	0	0	0
71230	71230	SPOT	TAT	2011-09-22 22:59:59		5		3	-34.126	24.426	12	100	0	0	0	100	0	0	0	0	0	0	0	0
71230	71230	SPOT	TAT	2011-09-23 04:59:59		3		3	-34.126	24.422	12	100	0	0	0	100	0	0	0	0	0	0	0	0
71230	71230	SPOT	TAT	2011-09-23 06:00:00		5		2	-34.125	24.424	12	100	0	0	0	19	5	8	13	28	27	0	0	0
71230	71230	SPOT	TAT	2011-09-23 10:59:59		4		3	-34.125	24.425	12	100	0	0	0	0	24	21	16	37	2	0	0	0
71230	71230	SPOT	TAT	2011-09-23 16:59:59		4		3	-34.126	24.425	12	100	0	0	0	27	73	0	0	0	0	0	0	0
71230	71230	SPOT	TAT	2011-09-23 18:00:00		4		3	-34.126	24.425	12	100	0	0	0	76	24	0	0	0	0	0	0	0
71230	71230	SPOT	TAT	2011-09-23 22:59:59		3		3	-34.126	24.425	12	100	0	0	0	100	0	0	0	0	0	0	0	0
71230	71230	SPOT	TAT	2011-09-24 04:59:59		2		3	-34.126	24.424	12	100	0	0	0	100	0	0	0	0	0	0	0	0
71230	71230	SPOT	TAT	2011-09-24 06:00:00		1		3	-34.126	24.424	12	101	0	0	0	14	6	2	7	32	32	7	1	0
71230	71230	SPOT	TAT	2011-09-24 10:59:59		1		3	-34.125	24.424	12	99	0	0	0	0	13	14	14	42	16	0	0	0
71230	71230	SPOT	TAT	2011-09-24 16:59:59		1		2	-34.125	24.424	12	100	0	0	0	0	100	0	0	0	0	0	0	0
[truncated: 35 more columns]
