# Supplementary material for: Satellite tagging highlights the importance of productive Mozambican coastal waters to the ecology and conservation of whale sharks
Source: PubMed Central journal article supplement (PMC5755488; doi:10.7717/peerj.4161), 2018-01-02

**A**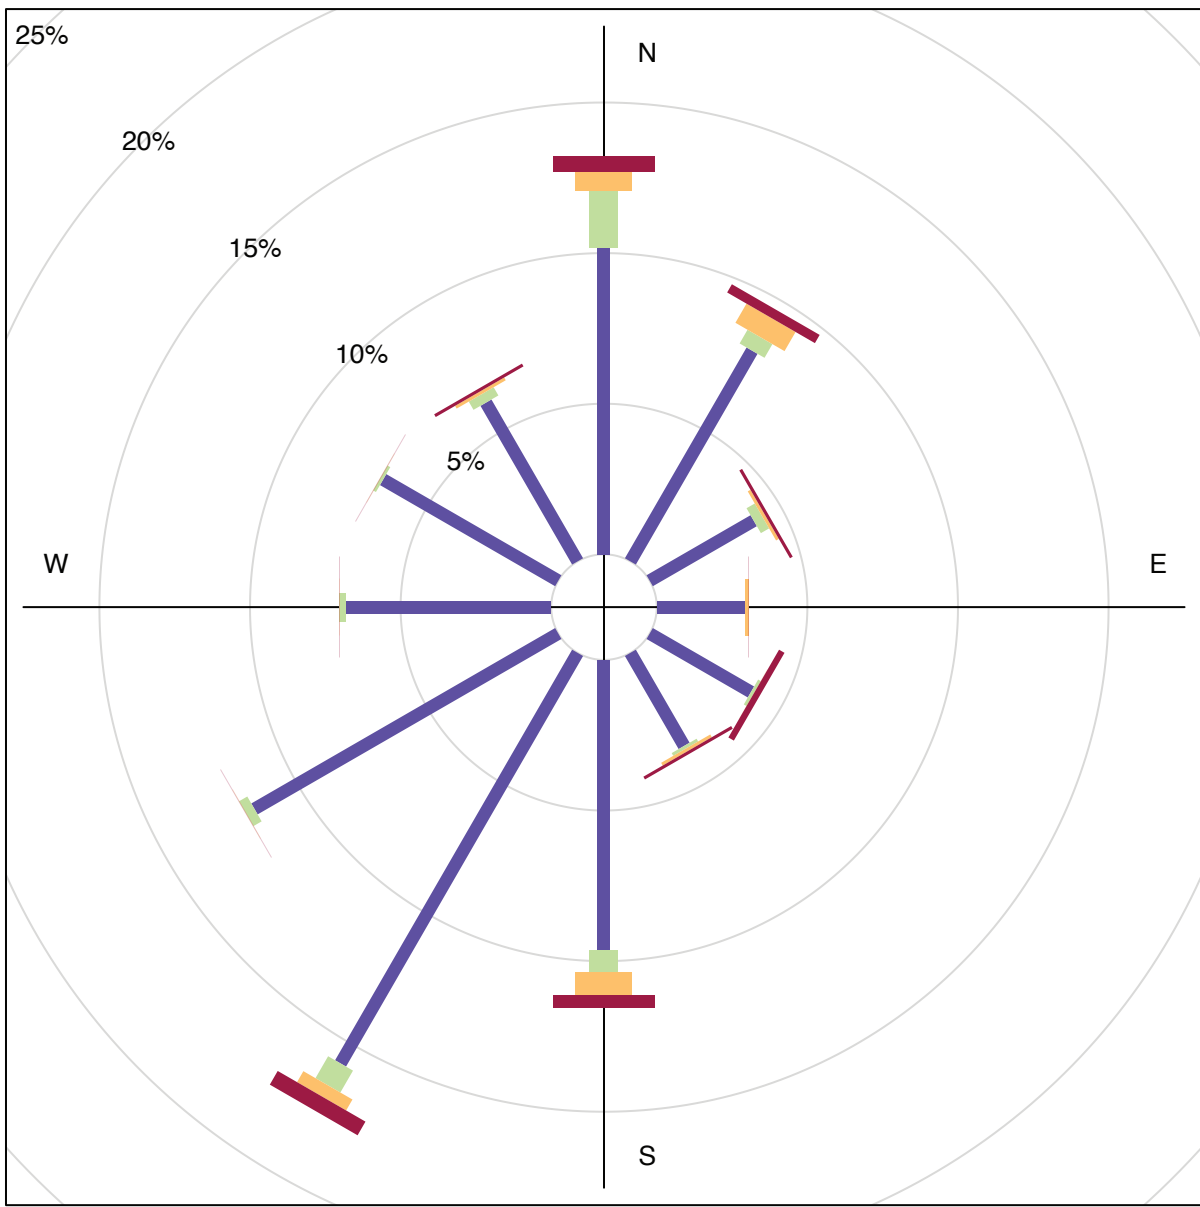

Step length (kms) 0 to 20 20 to 40 40 to 60 60 to 750.13  
**Frequency of counts by swimming direction (%)**

**B**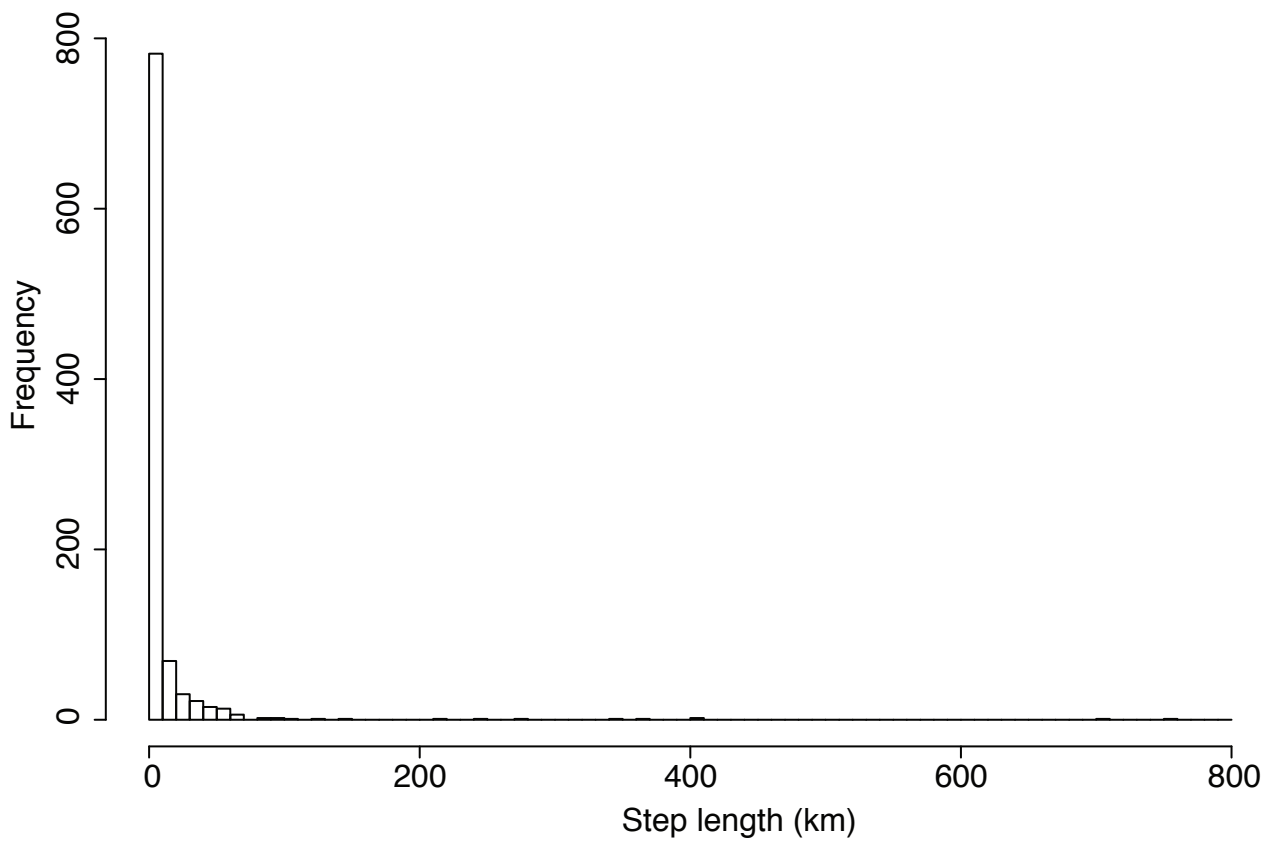

Supplement: peerj-06-4161-s001.pdf [file peerj-06-4161-s001.pdf]
